# Supplementary material
Source: publisher figshare collection journal article supplement (https://gsajournals.figshare.com/ndownloader/files/31024297)
Supplement: Supplementary file 1 [file 31024297]

## Sheet: Figure 3G int
genotype	animal_num	threshold	ch1_spots	ch2_spots	coloc_spots	ch1_percent	ch2_percent
BOX770	BOX770_A	1	191	327	86	45.026	26.3
BOX770	BOX770_A	2	241	284	88	36.515	30.986
BOX770	BOX770_A	3	265	193	61	23.019	31.606
BOX770	BOX770_A	4	253	132	50	19.763	37.879
BOX770	BOX770_A	5	219	100	37	16.895	37
BOX770	BOX770_A	6	191	80	35	18.325	43.75
BOX770	BOX770_A	7	150	63	25	16.667	39.683
BOX770	BOX770_A	8	123	59	24	19.512	40.678
BOX770	BOX770_A	9	108	58	25	23.148	43.103
BOX770	BOX770_A	10	99	49	21	21.212	42.857
BOX770	BOX770_A	11	94	45	25	26.596	55.556
BOX770	BOX770_A	12	92	43	26	28.261	60.465
BOX770	BOX770_A	13	86	39	25	29.07	64.103
BOX770	BOX770_A	14	85	34	22	25.882	64.706
BOX770	BOX770_A	15	78	31	22	28.205	70.968
BOX770	BOX770_A	16	69	27	18	26.087	66.667
BOX770	BOX770_A	17	66	22	16	24.242	72.727
BOX770	BOX770_A	18	62	22	15	24.194	68.182
BOX770	BOX770_A	19	63	21	15	23.81	71.429
BOX770	BOX770_A	20	57	19	13	22.807	68.421
BOX770	BOX770_A	21	56	16	13	23.214	81.25
BOX770	BOX770_A	22	54	16	13	24.074	81.25
BOX770	BOX770_A	23	52	14	13	25	92.857
BOX770	BOX770_A	24	45	14	12	26.667	85.714
BOX770	BOX770_A	25	44	11	10	22.727	90.909
BOX770	BOX770_A	30	39	8	8	20.513	100
BOX770	BOX770_A	35	34	7	7	20.588	100
BOX770	BOX770_A	40	29	6	6	20.69	100
BOX770	BOX770_A	45	26	6	6	23.077	100
BOX770	BOX770_A	50	26	5	5	19.231	100
BOX770	BOX770_B	1	257	374	91	35.409	24.332
BOX770	BOX770_B	2	353	535	146	41.36	27.29
BOX770	BOX770_B	3	384	561	157	40.885	27.986
BOX770	BOX770_B	4	413	484	147	35.593	30.372
BOX770	BOX770_B	5	416	371	122	29.327	32.884
BOX770	BOX770_B	6	380	250	94	24.737	37.6
BOX770	BOX770_B	7	360	174	67	18.611	38.506
BOX770	BOX770_B	8	307	124	52	16.938	41.935
BOX770	BOX770_B	9	283	94	48	16.961	51.064
BOX770	BOX770_B	10	250	73	36	14.4	49.315
BOX770	BOX770_B	11	232	55	33	14.224	60
BOX770	BOX770_B	12	215	49	33	15.349	67.347
BOX770	BOX770_B	13	193	43	29	15.026	67.442
BOX770	BOX770_B	14	172	32	23	13.372	71.875
BOX770	BOX770_B	15	153	28	21	13.725	75
BOX770	BOX770_B	16	137	27	21	15.328	77.778
BOX770	BOX770_B	17	124	24	20	16.129	83.333
BOX770	BOX770_B	18	113	24	21	18.584	87.5
BOX770	BOX770_B	19	111	22	19	17.117	86.364
BOX770	BOX770_B	20	103	19	17	16.505	89.474
BOX770	BOX770_B	21	97	16	14	14.433	87.5
BOX770	BOX770_B	22	89	16	14	15.73	87.5
BOX770	BOX770_B	23	82	17	14	17.073	82.353
BOX770	BOX770_B	24	74	15	14	18.919	93.333
BOX770	BOX770_B	25	67	13	12	17.91	92.308
BOX770	BOX770_B	30	50	12	10	20	83.333
BOX770	BOX770_B	35	39	10	8	20.513	80
BOX770	BOX770_B	40	37	10	8	21.622	80
BOX770	BOX770_B	45	28	10	8	28.571	80
BOX770	BOX770_B	50	24	7	6	25	85.714
BOX770	BOX770_C	1	358	566	158	44.134	27.915
BOX770	BOX770_C	2	377	545	158	41.91	28.991
BOX770	BOX770_C	3	399	405	130	32.581	32.099
BOX770	BOX770_C	4	382	293	106	27.749	36.177
BOX770	BOX770_C	5	389	241	88	22.622	36.515
BOX770	BOX770_C	6	379	217	81	21.372	37.327
BOX770	BOX770_C	7	355	186	70	19.718	37.634
BOX770	BOX770_C	8	335	169	63	18.806	37.278
BOX770	BOX770_C	9	314	156	59	18.79	37.821
BOX770	BOX770_C	10	303	156	59	19.472	37.821
BOX770	BOX770_C	11	302	147	57	18.874	38.776
BOX770	BOX770_C	12	281	140	55	19.573	39.286
BOX770	BOX770_C	13	269	135	50	18.587	37.037
BOX770	BOX770_C	14	271	131	52	19.188	39.695
BOX770	BOX770_C	15	271	129	53	19.557	41.085
BOX770	BOX770_C	16	266	126	52	19.549	41.27
BOX770	BOX770_C	17	261	127	51	19.54	40.157
BOX770	BOX770_C	18	267	124	49	18.352	39.516
BOX770	BOX770_C	19	260	120	48	18.462	40
BOX770	BOX770_C	20	261	122	47	18.008	38.525
BOX770	BOX770_C	21	266	119	48	18.045	40.336
BOX770	BOX770_C	22	263	117	48	18.251	41.026
BOX770	BOX770_C	23	262	114	48	18.321	42.105
BOX770	BOX770_C	24	258	109	47	18.217	43.119
BOX770	BOX770_C	25	259	107	48	18.533	44.86
BOX770	BOX770_C	30	261	99	46	17.625	46.465
BOX770	BOX770_C	35	251	95	45	17.928	47.368
BOX770	BOX770_C	40	237	85	40	16.878	47.059
BOX770	BOX770_C	45	233	79	38	16.309	48.101
BOX770	BOX770_C	50	221	75	36	16.29	48
BOX771	BOX771_A	1	99	180	33	33.333	18.333
BOX771	BOX771_A	2	114	173	46	40.351	26.59
BOX771	BOX771_A	3	121	129	36	29.752	27.907
BOX771	BOX771_A	4	116	92	25	21.552	27.174
BOX771	BOX771_A	5	118	71	22	18.644	30.986
BOX771	BOX771_A	6	108	49	15	13.889	30.612
BOX771	BOX771_A	7	100	38	12	12	31.579
BOX771	BOX771_A	8	100	30	8	8	26.667
BOX771	BOX771_A	9	105	25	6	5.714	24
BOX771	BOX771_A	10	99	21	5	5.051	23.81
BOX771	BOX771_A	11	96	15	5	5.208	33.333
BOX771	BOX771_A	12	93	13	3	3.226	23.077
BOX771	BOX771_A	13	86	11	2	2.326	18.182
BOX771	BOX771_A	14	86	9	2	2.326	22.222
BOX771	BOX771_A	15	84	7	2	2.381	28.571
BOX771	BOX771_A	16	80	6	2	2.5	33.333
BOX771	BOX771_A	17	82	5	1	1.22	20
BOX771	BOX771_A	18	79	5	0	0	0
BOX771	BOX771_A	19	78	4	0	0	0
BOX771	BOX771_A	20	76	4	0	0	0
BOX771	BOX771_A	21	77	4	0	0	0
BOX771	BOX771_A	22	71	3	0	0	0
BOX771	BOX771_A	23	68	3	0	0	0
BOX771	BOX771_A	24	69	3	0	0	0
BOX771	BOX771_A	25	67	2	0	0	0
BOX771	BOX771_A	30	63	0	0	0	NaN
BOX771	BOX771_A	35	53	0	0	0	NaN
BOX771	BOX771_A	40	48	0	0	0	NaN
BOX771	BOX771_A	45	46	0	0	0	NaN
BOX771	BOX771_A	50	46	0	0	0	NaN
BOX771	BOX771_B	1	1039	1173	249	23.965	21.228
BOX771	BOX771_B	2	1157	1690	378	32.671	22.367
BOX771	BOX771_B	3	1210	1780	427	35.289	23.989
BOX771	BOX771_B	4	1228	1565	393	32.003	25.112
BOX771	BOX771_B	5	1238	1211	321	25.929	26.507
BOX771	BOX771_B	6	1244	917	236	18.971	25.736
BOX771	BOX771_B	7	1225	684	181	14.776	26.462
BOX771	BOX771_B	8	1209	509	123	10.174	24.165
BOX771	BOX771_B	9	1197	378	83	6.934	21.958
BOX771	BOX771_B	10	1166	312	65	5.575	20.833
BOX771	BOX771_B	11	1140	248	57	5	22.984
BOX771	BOX771_B	12	1096	198	47	4.288	23.737
BOX771	BOX771_B	13	1071	182	36	3.361	19.78
BOX771	BOX771_B	14	1046	157	24	2.294	15.287
BOX771	BOX771_B	15	1014	140	20	1.972	14.286
BOX771	BOX771_B	16	975	127	15	1.538	11.811
BOX771	BOX771_B	17	944	121	13	1.377	10.744
BOX771	BOX771_B	18	913	114	9	0.986	7.895
BOX771	BOX771_B	19	890	108	7	0.787	6.481
BOX771	BOX771_B	20	873	108	8	0.916	7.407
BOX771	BOX771_B	21	834	108	7	0.839	6.481
BOX771	BOX771_B	22	809	104	6	0.742	5.769
BOX771	BOX771_B	23	781	99	4	0.512	4.04
BOX771	BOX771_B	24	757	100	5	0.661	5
BOX771	BOX771_B	25	732	101	5	0.683	4.95
BOX771	BOX771_B	30	632	92	8	1.266	8.696
BOX771	BOX771_B	35	579	83	9	1.554	10.843
BOX771	BOX771_B	40	527	74	9	1.708	12.162
BOX771	BOX771_B	45	492	59	6	1.22	10.169
BOX771	BOX771_B	50	456	47	9	1.974	19.149
BOX771	BOX771_C	1	599	354	81	13.523	22.881
BOX771	BOX771_C	2	741	397	135	18.219	34.005
BOX771	BOX771_C	3	768	327	126	16.406	38.532
BOX771	BOX771_C	4	716	271	95	13.268	35.055
BOX771	BOX771_C	5	616	247	70	11.364	28.34
BOX771	BOX771_C	6	542	231	58	10.701	25.108
BOX771	BOX771_C	7	477	230	54	11.321	23.478
BOX771	BOX771_C	8	414	237	47	11.353	19.831
BOX771	BOX771_C	9	385	237	47	12.208	19.831
BOX771	BOX771_C	10	368	253	54	14.674	21.344
BOX771	BOX771_C	11	352	271	59	16.761	21.771
BOX771	BOX771_C	12	339	291	71	20.944	24.399
BOX771	BOX771_C	13	338	299	70	20.71	23.411
BOX771	BOX771_C	14	340	319	74	21.765	23.197
BOX771	BOX771_C	15	337	333	78	23.145	23.423
BOX771	BOX771_C	16	332	339	86	25.904	25.369
BOX771	BOX771_C	17	335	335	85	25.373	25.373
BOX771	BOX771_C	18	337	346	94	27.893	27.168
BOX771	BOX771_C	19	332	349	98	29.518	28.08
BOX771	BOX771_C	20	331	352	102	30.816	28.977
BOX771	BOX771_C	21	326	360	105	32.209	29.167
BOX771	BOX771_C	22	334	364	110	32.934	30.22
BOX771	BOX771_C	23	333	359	103	30.931	28.691
BOX771	BOX771_C	24	334	364	106	31.737	29.121
BOX771	BOX771_C	25	336	358	104	30.952	29.05
BOX771	BOX771_C	30	345	298	92	26.667	30.872
BOX771	BOX771_C	35	342	249	82	23.977	32.932
BOX771	BOX771_C	40	326	192	69	21.166	35.938
BOX771	BOX771_C	45	313	146	52	16.613	35.616
BOX771	BOX771_C	50	305	110	33	10.82	30
BOX771	BOX771_D	1	872	1381	324	37.156	23.461
BOX771	BOX771_D	2	1144	1463	484	42.308	33.083
BOX771	BOX771_D	3	1223	928	369	30.172	39.763
BOX771	BOX771_D	4	1119	434	162	14.477	37.327
BOX771	BOX771_D	5	977	191	73	7.472	38.22
BOX771	BOX771_D	6	780	90	30	3.846	33.333
BOX771	BOX771_D	7	612	46	12	1.961	26.087
BOX771	BOX771_D	8	498	37	9	1.807	24.324
BOX771	BOX771_D	9	429	28	7	1.632	25
BOX771	BOX771_D	10	376	33	8	2.128	24.242
BOX771	BOX771_D	11	343	36	9	2.624	25
BOX771	BOX771_D	12	305	37	12	3.934	32.432
BOX771	BOX771_D	13	278	35	11	3.957	31.429
BOX771	BOX771_D	14	258	36	12	4.651	33.333
BOX771	BOX771_D	15	238	40	13	5.462	32.5
BOX771	BOX771_D	16	223	41	15	6.726	36.585
BOX771	BOX771_D	17	210	45	17	8.095	37.778
BOX771	BOX771_D	18	200	48	17	8.5	35.417
BOX771	BOX771_D	19	192	46	16	8.333	34.783
BOX771	BOX771_D	20	183	45	15	8.197	33.333
BOX771	BOX771_D	21	175	49	15	8.571	30.612
BOX771	BOX771_D	22	166	53	16	9.639	30.189
BOX771	BOX771_D	23	162	56	15	9.259	26.786
BOX771	BOX771_D	24	149	54	14	9.396	25.926
BOX771	BOX771_D	25	146	60	15	10.274	25
BOX771	BOX771_D	30	123	65	20	16.26	30.769
BOX771	BOX771_D	35	103	57	21	20.388	36.842
BOX771	BOX771_D	40	110	43	22	20	51.163
BOX771	BOX771_D	45	90	35	19	21.111	54.286
BOX771	BOX771_D	50	86	27	15	17.442	55.556
BOX771	BOX771_E	1	246	398	89	36.179	22.362
BOX771	BOX771_E	2	343	288	100	29.155	34.722
BOX771	BOX771_E	3	355	193	53	14.93	27.461
BOX771	BOX771_E	4	300	154	28	9.333	18.182
BOX771	BOX771_E	5	235	142	27	11.489	19.014
BOX771	BOX771_E	6	184	130	21	11.413	16.154
BOX771	BOX771_E	7	153	117	21	13.725	17.949
BOX771	BOX771_E	8	128	91	21	16.406	23.077
BOX771	BOX771_E	9	114	69	14	12.281	20.29
BOX771	BOX771_E	10	99	55	10	10.101	18.182
BOX771	BOX771_E	11	88	40	6	6.818	15
BOX771	BOX771_E	12	82	36	4	4.878	11.111
BOX771	BOX771_E	13	79	30	1	1.266	3.333
BOX771	BOX771_E	14	82	25	3	3.659	12
BOX771	BOX771_E	15	83	19	2	2.41	10.526
BOX771	BOX771_E	16	81	20	3	3.704	15
BOX771	BOX771_E	17	81	17	2	2.469	11.765
BOX771	BOX771_E	18	79	13	3	3.797	23.077
BOX771	BOX771_E	19	78	11	3	3.846	27.273
BOX771	BOX771_E	20	78	11	2	2.564	18.182
BOX771	BOX771_E	21	79	9	1	1.266	11.111
BOX771	BOX771_E	22	80	9	1	1.25	11.111
BOX771	BOX771_E	23	82	9	1	1.22	11.111
BOX771	BOX771_E	24	86	8	1	1.163	12.5
BOX771	BOX771_E	25	83	8	1	1.205	12.5
BOX771	BOX771_E	30	81	7	1	1.235	14.286
BOX771	BOX771_E	35	72	4	0	0	0
BOX771	BOX771_E	40	63	4	0	0	0
BOX771	BOX771_E	45	56	4	0	0	0
BOX771	BOX771_E	50	55	4	1	1.818	25
BOX771	BOX771_F	1	683	665	131	19.18	19.699
BOX771	BOX771_F	2	771	926	192	24.903	20.734
BOX771	BOX771_F	3	803	981	197	24.533	20.082
BOX771	BOX771_F	4	852	945	213	25	22.54
BOX771	BOX771_F	5	873	889	203	23.253	22.835
BOX771	BOX771_F	6	880	813	197	22.386	24.231
BOX771	BOX771_F	7	887	744	185	20.857	24.866
BOX771	BOX771_F	8	902	670	166	18.404	24.776
BOX771	BOX771_F	9	906	587	152	16.777	25.894
BOX771	BOX771_F	10	914	519	129	14.114	24.855
BOX771	BOX771_F	11	922	482	123	13.341	25.519
BOX771	BOX771_F	12	914	436	108	11.816	24.771
BOX771	BOX771_F	13	919	387	89	9.684	22.997
BOX771	BOX771_F	14	911	346	83	9.111	23.988
BOX771	BOX771_F	15	890	301	77	8.652	25.581
BOX771	BOX771_F	16	881	261	59	6.697	22.605
BOX771	BOX771_F	17	875	238	61	6.971	25.63
BOX771	BOX771_F	18	863	220	52	6.025	23.636
BOX771	BOX771_F	19	841	196	45	5.351	22.959
BOX771	BOX771_F	20	825	173	41	4.97	23.699
BOX771	BOX771_F	21	800	168	40	5	23.81
BOX771	BOX771_F	22	780	149	38	4.872	25.503
BOX771	BOX771_F	23	764	129	33	4.319	25.581
BOX771	BOX771_F	24	734	119	28	3.815	23.529
BOX771	BOX771_F	25	713	111	24	3.366	21.622
BOX771	BOX771_F	30	629	69	9	1.431	13.043
BOX771	BOX771_F	35	566	51	5	0.883	9.804
BOX771	BOX771_F	40	502	42	6	1.195	14.286
BOX771	BOX771_F	45	439	32	2	0.456	6.25
BOX771	BOX771_F	50	402	24	3	0.746	12.5

## Sheet: Figure 3G epi
genotype	animal_num	threshold	ch1_spots	ch2_spots	coloc_spots	ch1_percent	ch2_percent
BOX770	BOX770_A	1	327	421	109	33.333	25.891
BOX770	BOX770_A	2	374	595	150	40.107	25.21
BOX770	BOX770_A	3	427	676	188	44.028	27.811
BOX770	BOX770_A	4	490	654	219	44.694	33.486
BOX770	BOX770_A	5	543	598	226	41.621	37.793
BOX770	BOX770_A	6	594	539	232	39.057	43.043
BOX770	BOX770_A	7	641	483	226	35.257	46.791
BOX770	BOX770_A	8	661	437	222	33.585	50.801
BOX770	BOX770_A	9	678	393	209	30.826	53.181
BOX770	BOX770_A	10	711	334	193	27.145	57.784
BOX770	BOX770_A	11	722	298	183	25.346	61.409
BOX770	BOX770_A	12	726	256	175	24.105	68.359
BOX770	BOX770_A	13	725	221	156	21.517	70.588
BOX770	BOX770_A	14	719	189	135	18.776	71.429
BOX770	BOX770_A	15	721	165	123	17.06	74.545
BOX770	BOX770_A	16	722	144	105	14.543	72.917
BOX770	BOX770_A	17	717	132	99	13.808	75
BOX770	BOX770_A	18	718	122	98	13.649	80.328
BOX770	BOX770_A	19	717	111	89	12.413	80.18
BOX770	BOX770_A	20	710	98	80	11.268	81.633
BOX770	BOX770_A	21	703	92	76	10.811	82.609
BOX770	BOX770_A	22	693	87	73	10.534	83.908
BOX770	BOX770_A	23	690	76	67	9.71	88.158
BOX770	BOX770_A	24	688	65	60	8.721	92.308
BOX770	BOX770_A	25	669	60	55	8.221	91.667
BOX770	BOX770_A	30	608	34	28	4.605	82.353
BOX770	BOX770_A	35	569	18	17	2.988	94.444
BOX770	BOX770_A	40	499	8	8	1.603	100
BOX770	BOX770_A	45	455	6	6	1.319	100
BOX770	BOX770_A	50	416	3	3	0.721	100
BOX770	BOX770_B	1	865	1182	359	41.503	30.372
BOX770	BOX770_B	2	978	1176	390	39.877	33.163
BOX770	BOX770_B	3	1072	981	382	35.634	38.94
BOX770	BOX770_B	4	1127	864	379	33.629	43.866
BOX770	BOX770_B	5	1171	740	350	29.889	47.297
BOX770	BOX770_B	6	1196	643	333	27.843	51.788
BOX770	BOX770_B	7	1198	552	312	26.043	56.522
BOX770	BOX770_B	8	1186	477	293	24.705	61.426
BOX770	BOX770_B	9	1166	425	275	23.585	64.706
BOX770	BOX770_B	10	1155	382	268	23.203	70.157
BOX770	BOX770_B	11	1134	325	239	21.076	73.538
BOX770	BOX770_B	12	1101	291	222	20.163	76.289
BOX770	BOX770_B	13	1065	257	204	19.155	79.377
BOX770	BOX770_B	14	1017	233	188	18.486	80.687
BOX770	BOX770_B	15	989	210	177	17.897	84.286
BOX770	BOX770_B	16	974	181	160	16.427	88.398
BOX770	BOX770_B	17	937	157	137	14.621	87.261
BOX770	BOX770_B	18	905	138	121	13.37	87.681
BOX770	BOX770_B	19	883	130	113	12.797	86.923
BOX770	BOX770_B	20	850	119	104	12.235	87.395
BOX770	BOX770_B	21	826	108	95	11.501	87.963
BOX770	BOX770_B	22	805	98	88	10.932	89.796
BOX770	BOX770_B	23	775	90	82	10.581	91.111
BOX770	BOX770_B	24	754	84	77	10.212	91.667
BOX770	BOX770_B	25	727	81	73	10.041	90.123
BOX770	BOX770_B	30	626	56	55	8.786	98.214
BOX770	BOX770_B	35	558	35	35	6.272	100
BOX770	BOX770_B	40	480	21	21	4.375	100
BOX770	BOX770_B	45	405	14	14	3.457	100
BOX770	BOX770_B	50	357	10	10	2.801	100
BOX770	BOX770_C	1	896	1151	297	33.147	25.804
BOX770	BOX770_C	2	1087	1622	471	43.33	29.038
BOX770	BOX770_C	3	1264	1715	583	46.123	33.994
BOX770	BOX770_C	4	1381	1571	595	43.085	37.874
BOX770	BOX770_C	5	1500	1436	625	41.667	43.524
BOX770	BOX770_C	6	1573	1263	598	38.017	47.348
BOX770	BOX770_C	7	1583	1103	566	35.755	51.315
BOX770	BOX770_C	8	1598	958	531	33.229	55.428
BOX770	BOX770_C	9	1592	852	510	32.035	59.859
BOX770	BOX770_C	10	1559	769	473	30.34	61.508
BOX770	BOX770_C	11	1538	681	444	28.869	65.198
BOX770	BOX770_C	12	1545	612	426	27.573	69.608
BOX770	BOX770_C	13	1531	535	399	26.061	74.579
BOX770	BOX770_C	14	1490	489	372	24.966	76.074
BOX770	BOX770_C	15	1463	431	338	23.103	78.422
BOX770	BOX770_C	16	1436	391	316	22.006	80.818
BOX770	BOX770_C	17	1404	342	284	20.228	83.041
BOX770	BOX770_C	18	1381	309	261	18.899	84.466
BOX770	BOX770_C	19	1349	272	235	17.42	86.397
BOX770	BOX770_C	20	1306	256	223	17.075	87.109
BOX770	BOX770_C	21	1280	230	204	15.938	88.696
BOX770	BOX770_C	22	1262	208	188	14.897	90.385
BOX770	BOX770_C	23	1236	199	181	14.644	90.955
BOX770	BOX770_C	24	1206	185	171	14.179	92.432
BOX770	BOX770_C	25	1165	166	153	13.133	92.169
BOX770	BOX770_C	30	1038	113	103	9.923	91.15
BOX770	BOX770_C	35	925	68	65	7.027	95.588
BOX770	BOX770_C	40	806	48	46	5.707	95.833
BOX770	BOX770_C	45	730	36	36	4.932	100
BOX770	BOX770_C	50	643	26	26	4.044	100
BOX771	BOX771_A	1	344	512	113	32.849	22.07
BOX771	BOX771_A	2	436	426	112	25.688	26.291
BOX771	BOX771_A	3	449	368	103	22.94	27.989
BOX771	BOX771_A	4	448	276	64	14.286	23.188
BOX771	BOX771_A	5	409	223	51	12.469	22.87
BOX771	BOX771_A	6	383	170	40	10.444	23.529
BOX771	BOX771_A	7	352	116	26	7.386	22.414
BOX771	BOX771_A	8	322	84	23	7.143	27.381
BOX771	BOX771_A	9	295	58	19	6.441	32.759
BOX771	BOX771_A	10	274	44	13	4.745	29.545
BOX771	BOX771_A	11	264	34	9	3.409	26.471
BOX771	BOX771_A	12	243	28	6	2.469	21.429
BOX771	BOX771_A	13	227	30	6	2.643	20
BOX771	BOX771_A	14	220	25	5	2.273	20
BOX771	BOX771_A	15	219	21	1	0.457	4.762
BOX771	BOX771_A	16	214	24	1	0.467	4.167
BOX771	BOX771_A	17	215	22	1	0.465	4.545
BOX771	BOX771_A	18	208	20	1	0.481	5
BOX771	BOX771_A	19	204	18	2	0.98	11.111
BOX771	BOX771_A	20	197	17	3	1.523	17.647
BOX771	BOX771_A	21	190	19	5	2.632	26.316
BOX771	BOX771_A	22	183	17	3	1.639	17.647
BOX771	BOX771_A	23	172	15	2	1.163	13.333
BOX771	BOX771_A	24	169	9	0	0	0
BOX771	BOX771_A	25	165	5	0	0	0
BOX771	BOX771_A	30	141	1	0	0	0
BOX771	BOX771_A	35	130	0	0	0	NaN
BOX771	BOX771_A	40	127	0	0	0	NaN
BOX771	BOX771_A	45	120	0	0	0	NaN
BOX771	BOX771_A	50	109	0	0	0	NaN
BOX771	BOX771_B	1	970	952	205	21.134	21.534
BOX771	BOX771_B	2	1221	1714	479	39.23	27.946
BOX771	BOX771_B	3	1346	1801	599	44.502	33.259
BOX771	BOX771_B	4	1354	1419	465	34.343	32.77
BOX771	BOX771_B	5	1301	931	302	23.213	32.438
BOX771	BOX771_B	6	1199	579	187	15.596	32.297
BOX771	BOX771_B	7	1101	335	105	9.537	31.343
BOX771	BOX771_B	8	1022	189	50	4.892	26.455
BOX771	BOX771_B	9	953	119	32	3.358	26.891
BOX771	BOX771_B	10	878	73	19	2.164	26.027
BOX771	BOX771_B	11	820	50	11	1.341	22
BOX771	BOX771_B	12	765	38	12	1.569	31.579
BOX771	BOX771_B	13	723	26	7	0.968	26.923
BOX771	BOX771_B	14	698	19	2	0.287	10.526
BOX771	BOX771_B	15	674	15	3	0.445	20
BOX771	BOX771_B	16	653	13	3	0.459	23.077
BOX771	BOX771_B	17	622	12	2	0.322	16.667
BOX771	BOX771_B	18	604	9	2	0.331	22.222
BOX771	BOX771_B	19	582	7	1	0.172	14.286
BOX771	BOX771_B	20	551	7	1	0.181	14.286
BOX771	BOX771_B	21	537	4	1	0.186	25
BOX771	BOX771_B	22	515	2	1	0.194	50
BOX771	BOX771_B	23	494	0	0	0	NaN
BOX771	BOX771_B	24	478	0	0	0	NaN
BOX771	BOX771_B	25	468	0	0	0	NaN
BOX771	BOX771_B	30	422	0	0	0	NaN
BOX771	BOX771_B	35	383	0	0	0	NaN
BOX771	BOX771_B	40	348	0	0	0	NaN
BOX771	BOX771_B	45	320	0	0	0	NaN
BOX771	BOX771_B	50	301	0	0	0	NaN
BOX771	BOX771_C	1	674	1664	330	48.961	19.832
BOX771	BOX771_C	2	856	987	250	29.206	25.329
BOX771	BOX771_C	3	945	317	83	8.783	26.183
BOX771	BOX771_C	4	917	153	45	4.907	29.412
BOX771	BOX771_C	5	904	76	26	2.876	34.211
BOX771	BOX771_C	6	883	38	12	1.359	31.579
BOX771	BOX771_C	7	858	25	8	0.932	32
BOX771	BOX771_C	8	839	11	6	0.715	54.545
BOX771	BOX771_C	9	821	6	6	0.731	100
BOX771	BOX771_C	10	798	4	4	0.501	100
BOX771	BOX771_C	11	786	2	2	0.254	100
BOX771	BOX771_C	12	764	1	1	0.131	100
BOX771	BOX771_C	13	759	0	0	0	NaN
BOX771	BOX771_C	14	737	0	0	0	NaN
BOX771	BOX771_C	15	720	0	0	0	NaN
BOX771	BOX771_C	16	702	0	0	0	NaN
BOX771	BOX771_C	17	692	0	0	0	NaN
BOX771	BOX771_C	18	673	0	0	0	NaN
BOX771	BOX771_C	19	660	0	0	0	NaN
BOX771	BOX771_C	20	646	0	0	0	NaN
BOX771	BOX771_C	21	641	0	0	0	NaN
BOX771	BOX771_C	22	626	0	0	0	NaN
BOX771	BOX771_C	23	606	0	0	0	NaN
BOX771	BOX771_C	24	601	0	0	0	NaN
BOX771	BOX771_C	25	590	0	0	0	NaN
BOX771	BOX771_C	30	531	0	0	0	NaN
BOX771	BOX771_C	35	474	0	0	0	NaN
BOX771	BOX771_C	40	420	0	0	0	NaN
BOX771	BOX771_C	45	371	0	0	0	NaN
BOX771	BOX771_C	50	339	0	0	0	NaN
BOX771	BOX771_D	1	551	1878	280	50.817	14.909
BOX771	BOX771_D	2	1005	1323	350	34.826	26.455
BOX771	BOX771_D	3	1178	456	153	12.988	33.553
BOX771	BOX771_D	4	1187	109	44	3.707	40.367
BOX771	BOX771_D	5	1101	27	8	0.727	29.63
BOX771	BOX771_D	6	960	5	2	0.208	40
BOX771	BOX771_D	7	866	4	0	0	0
BOX771	BOX771_D	8	770	2	0	0	0
BOX771	BOX771_D	9	660	1	0	0	0
BOX771	BOX771_D	10	569	1	0	0	0
BOX771	BOX771_D	11	500	1	0	0	0
BOX771	BOX771_D	12	440	0	0	0	NaN
BOX771	BOX771_D	13	382	0	0	0	NaN
BOX771	BOX771_D	14	337	0	0	0	NaN
BOX771	BOX771_D	15	290	0	0	0	NaN
BOX771	BOX771_D	16	251	0	0	0	NaN
BOX771	BOX771_D	17	222	0	0	0	NaN
BOX771	BOX771_D	18	200	0	0	0	NaN
BOX771	BOX771_D	19	180	0	0	0	NaN
BOX771	BOX771_D	20	158	0	0	0	NaN
BOX771	BOX771_D	21	143	0	0	0	NaN
BOX771	BOX771_D	22	129	0	0	0	NaN
BOX771	BOX771_D	23	115	0	0	0	NaN
BOX771	BOX771_D	24	106	0	0	0	NaN
BOX771	BOX771_D	25	101	0	0	0	NaN
BOX771	BOX771_D	30	58	0	0	0	NaN
BOX771	BOX771_D	35	38	0	0	0	NaN
BOX771	BOX771_D	40	21	0	0	0	NaN
BOX771	BOX771_D	45	14	0	0	0	NaN
BOX771	BOX771_D	50	8	0	0	0	NaN

## Sheet: Figure 3J
genotype	animal_num	threshold	ch1_spots	ch2_spots	coloc_spots	ch1_percent	ch2_percent
BOX839	BOX839_A	1	1920	2784	896	46.667	32.184
BOX839	BOX839_A	2	1752	1817	544	31.05	29.939
BOX839	BOX839_A	3	1339	1021	290	21.658	28.404
BOX839	BOX839_A	4	1124	741	231	20.552	31.174
BOX839	BOX839_A	5	1024	638	196	19.141	30.721
BOX839	BOX839_A	6	974	584	202	20.739	34.589
BOX839	BOX839_A	7	948	557	195	20.57	35.009
BOX839	BOX839_A	8	932	515	187	20.064	36.311
BOX839	BOX839_A	9	926	494	189	20.41	38.259
BOX839	BOX839_A	10	927	471	182	19.633	38.641
BOX839	BOX839_A	11	932	434	180	19.313	41.475
BOX839	BOX839_A	12	928	398	173	18.642	43.467
BOX839	BOX839_A	13	927	366	167	18.015	45.628
BOX839	BOX839_A	14	924	337	163	17.641	48.368
BOX839	BOX839_A	15	912	312	160	17.544	51.282
BOX839	BOX839_A	16	920	291	155	16.848	53.265
BOX839	BOX839_A	17	914	274	151	16.521	55.109
BOX839	BOX839_A	18	924	256	148	16.017	57.812
BOX839	BOX839_A	19	931	241	146	15.682	60.581
BOX839	BOX839_A	20	942	227	145	15.393	63.877
BOX839	BOX839_A	21	944	212	142	15.042	66.981
BOX839	BOX839_A	22	935	203	140	14.973	68.966
BOX839	BOX839_A	23	936	195	138	14.744	70.769
BOX839	BOX839_A	24	926	186	135	14.579	72.581
BOX839	BOX839_A	25	933	180	132	14.148	73.333
BOX839	BOX839_A	30	902	156	118	13.082	75.641
BOX839	BOX839_A	35	880	145	110	12.5	75.862
BOX839	BOX839_A	40	853	128	101	11.841	78.906
BOX839	BOX839_A	45	829	121	99	11.942	81.818
BOX839	BOX839_A	50	778	111	91	11.697	81.982
BOX839	BOX839_B	1	971	959	496	51.081	51.721
BOX839	BOX839_B	2	949	783	441	46.47	56.322
BOX839	BOX839_B	3	722	530	320	44.321	60.377
BOX839	BOX839_B	4	599	435	279	46.578	64.138
BOX839	BOX839_B	5	529	377	251	47.448	66.578
BOX839	BOX839_B	6	466	352	231	49.571	65.625
BOX839	BOX839_B	7	447	333	229	51.23	68.769
BOX839	BOX839_B	8	413	329	230	55.69	69.909
BOX839	BOX839_B	9	406	316	232	57.143	73.418
BOX839	BOX839_B	10	398	307	234	58.794	76.221
BOX839	BOX839_B	11	385	304	230	59.74	75.658
BOX839	BOX839_B	12	377	301	232	61.538	77.076
BOX839	BOX839_B	13	368	302	230	62.5	76.159
BOX839	BOX839_B	14	355	297	228	64.225	76.768
BOX839	BOX839_B	15	347	294	225	64.841	76.531
BOX839	BOX839_B	16	340	296	224	65.882	75.676
BOX839	BOX839_B	17	328	297	223	67.988	75.084
BOX839	BOX839_B	18	321	297	226	70.405	76.094
BOX839	BOX839_B	19	315	295	230	73.016	77.966
BOX839	BOX839_B	20	308	294	227	73.701	77.211
BOX839	BOX839_B	21	306	289	227	74.183	78.547
BOX839	BOX839_B	22	302	289	226	74.834	78.201
BOX839	BOX839_B	23	297	287	223	75.084	77.7
BOX839	BOX839_B	24	289	286	219	75.779	76.573
BOX839	BOX839_B	25	290	286	223	76.897	77.972
BOX839	BOX839_B	30	272	275	216	79.412	78.545
BOX839	BOX839_B	35	257	264	212	82.49	80.303
BOX839	BOX839_B	40	258	258	217	84.109	84.109
BOX839	BOX839_B	45	258	259	219	84.884	84.556
BOX839	BOX839_B	50	257	257	222	86.381	86.381
BOX839	BOX839_C	1	425	410	221	52	53.902
BOX839	BOX839_C	2	337	340	200	59.347	58.824
BOX839	BOX839_C	3	283	264	184	65.018	69.697
BOX839	BOX839_C	4	269	253	192	71.375	75.889
BOX839	BOX839_C	5	270	243	197	72.963	81.07
BOX839	BOX839_C	6	269	238	199	73.978	83.613
BOX839	BOX839_C	7	265	231	193	72.83	83.55
BOX839	BOX839_C	8	268	234	199	74.254	85.043
BOX839	BOX839_C	9	267	234	202	75.655	86.325
BOX839	BOX839_C	10	267	237	207	77.528	87.342
BOX839	BOX839_C	11	271	241	214	78.967	88.797
BOX839	BOX839_C	12	277	244	216	77.978	88.525
BOX839	BOX839_C	13	278	244	220	79.137	90.164
BOX839	BOX839_C	14	276	245	223	80.797	91.02
BOX839	BOX839_C	15	280	248	225	80.357	90.726
BOX839	BOX839_C	16	281	248	230	81.851	92.742
BOX839	BOX839_C	17	280	248	231	82.5	93.145
BOX839	BOX839_C	18	277	245	226	81.588	92.245
BOX839	BOX839_C	19	281	250	228	81.139	91.2
BOX839	BOX839_C	20	282	251	231	81.915	92.032
BOX839	BOX839_C	21	282	252	230	81.56	91.27
BOX839	BOX839_C	22	279	250	226	81.004	90.4
BOX839	BOX839_C	23	278	250	227	81.655	90.8
BOX839	BOX839_C	24	278	245	224	80.576	91.429
BOX839	BOX839_C	25	279	247	223	79.928	90.283
BOX839	BOX839_C	30	276	244	225	81.522	92.213
BOX839	BOX839_C	35	271	243	221	81.55	90.947
BOX839	BOX839_C	40	266	242	218	81.955	90.083
BOX839	BOX839_C	45	261	239	216	82.759	90.377
BOX839	BOX839_C	50	254	239	213	83.858	89.121
BOX839	BOX839_D	1	966	1311	492	50.932	37.529
BOX839	BOX839_D	2	727	638	191	26.272	29.937
BOX839	BOX839_D	3	441	255	67	15.193	26.275
BOX839	BOX839_D	4	343	138	32	9.329	23.188
BOX839	BOX839_D	5	304	90	15	4.934	16.667
BOX839	BOX839_D	6	297	65	9	3.03	13.846
BOX839	BOX839_D	7	298	50	11	3.691	22
BOX839	BOX839_D	8	295	44	13	4.407	29.545
BOX839	BOX839_D	9	294	33	13	4.422	39.394
BOX839	BOX839_D	10	296	29	15	5.068	51.724
BOX839	BOX839_D	11	298	26	15	5.034	57.692
BOX839	BOX839_D	12	298	22	11	3.691	50
BOX839	BOX839_D	13	298	20	12	4.027	60
BOX839	BOX839_D	14	298	17	9	3.02	52.941
BOX839	BOX839_D	15	300	14	8	2.667	57.143
BOX839	BOX839_D	16	297	13	9	3.03	69.231
BOX839	BOX839_D	17	292	11	7	2.397	63.636
BOX839	BOX839_D	18	290	10	6	2.069	60
BOX839	BOX839_D	19	293	9	5	1.706	55.556
BOX839	BOX839_D	20	293	9	5	1.706	55.556
BOX839	BOX839_D	21	293	9	5	1.706	55.556
BOX839	BOX839_D	22	287	9	5	1.742	55.556
BOX839	BOX839_D	23	285	10	5	1.754	50
BOX839	BOX839_D	24	287	8	5	1.742	62.5
BOX839	BOX839_D	25	288	8	6	2.083	75
BOX839	BOX839_D	30	279	9	5	1.792	55.556
BOX839	BOX839_D	35	260	9	4	1.538	44.444
BOX839	BOX839_D	40	246	9	4	1.626	44.444
BOX839	BOX839_D	45	233	10	5	2.146	50
BOX839	BOX839_D	50	225	19	7	3.111	36.842
BOX839	BOX839_E	1	3844	3321	1453	37.799	43.752
BOX839	BOX839_E	2	3089	3086	1094	35.416	35.45
BOX839	BOX839_E	3	1555	2492	567	36.463	22.753
BOX839	BOX839_E	4	930	1912	326	35.054	17.05
BOX839	BOX839_E	5	701	1371	230	32.81	16.776
BOX839	BOX839_E	6	626	1063	196	31.31	18.438
BOX839	BOX839_E	7	585	823	179	30.598	21.75
BOX839	BOX839_E	8	559	630	145	25.939	23.016
BOX839	BOX839_E	9	542	516	133	24.539	25.775
BOX839	BOX839_E	10	518	452	127	24.517	28.097
BOX839	BOX839_E	11	496	398	118	23.79	29.648
BOX839	BOX839_E	12	468	350	107	22.863	30.571
BOX839	BOX839_E	13	436	313	96	22.018	30.671
BOX839	BOX839_E	14	425	278	94	22.118	33.813
BOX839	BOX839_E	15	408	260	89	21.814	34.231
BOX839	BOX839_E	16	401	247	87	21.696	35.223
BOX839	BOX839_E	17	388	246	89	22.938	36.179
BOX839	BOX839_E	18	369	230	79	21.409	34.348
BOX839	BOX839_E	19	355	220	74	20.845	33.636
BOX839	BOX839_E	20	345	209	76	22.029	36.364
BOX839	BOX839_E	21	332	202	73	21.988	36.139
BOX839	BOX839_E	22	311	198	70	22.508	35.354
BOX839	BOX839_E	23	304	191	69	22.697	36.126
BOX839	BOX839_E	24	296	187	71	23.986	37.968
BOX839	BOX839_E	25	282	184	72	25.532	39.13
BOX839	BOX839_E	30	248	163	62	25	38.037
BOX839	BOX839_E	35	216	149	60	27.778	40.268
BOX839	BOX839_E	40	196	148	59	30.102	39.865
BOX839	BOX839_E	45	184	147	60	32.609	40.816
BOX839	BOX839_E	50	175	144	57	32.571	39.583
BOX839	BOX839_F	1	1626	2286	801	49.262	35.039
BOX839	BOX839_F	2	1408	1588	552	39.205	34.761
BOX839	BOX839_F	3	1098	857	360	32.787	42.007
BOX839	BOX839_F	4	928	640	324	34.914	50.625
BOX839	BOX839_F	5	855	539	295	34.503	54.731
BOX839	BOX839_F	6	816	482	287	35.172	59.544
BOX839	BOX839_F	7	794	456	281	35.39	61.623
BOX839	BOX839_F	8	753	425	262	34.794	61.647
BOX839	BOX839_F	9	723	389	236	32.642	60.668
BOX839	BOX839_F	10	712	368	228	32.022	61.957
BOX839	BOX839_F	11	704	334	210	29.83	62.874
BOX839	BOX839_F	12	672	310	200	29.762	64.516
BOX839	BOX839_F	13	652	296	189	28.988	63.851
BOX839	BOX839_F	14	648	281	183	28.241	65.125
BOX839	BOX839_F	15	625	271	173	27.68	63.838
BOX839	BOX839_F	16	614	264	169	27.524	64.015
BOX839	BOX839_F	17	602	258	161	26.744	62.403
BOX839	BOX839_F	18	585	248	158	27.009	63.71
BOX839	BOX839_F	19	584	235	149	25.514	63.404
BOX839	BOX839_F	20	580	221	141	24.31	63.801
BOX839	BOX839_F	21	573	212	139	24.258	65.566
BOX839	BOX839_F	22	569	205	135	23.726	65.854
BOX839	BOX839_F	23	562	200	133	23.665	66.5
BOX839	BOX839_F	24	556	189	126	22.662	66.667
BOX839	BOX839_F	25	545	190	125	22.936	65.789
BOX839	BOX839_F	30	519	167	112	21.58	67.066
BOX839	BOX839_F	35	499	149	100	20.04	67.114
BOX839	BOX839_F	40	484	130	88	18.182	67.692
BOX839	BOX839_F	45	472	118	83	17.585	70.339
BOX839	BOX839_F	50	467	110	75	16.06	68.182
BOX839	BOX839_G	1	887	969	444	50.056	45.82
BOX839	BOX839_G	2	957	720	344	35.946	47.778
BOX839	BOX839_G	3	751	476	256	34.088	53.782
BOX839	BOX839_G	4	586	370	219	37.372	59.189
BOX839	BOX839_G	5	480	325	204	42.5	62.769
BOX839	BOX839_G	6	421	308	201	47.743	65.26
BOX839	BOX839_G	7	386	295	205	53.109	69.492
BOX839	BOX839_G	8	357	288	202	56.583	70.139
BOX839	BOX839_G	9	328	283	201	61.28	71.025
BOX839	BOX839_G	10	304	264	196	64.474	74.242
BOX839	BOX839_G	11	288	255	194	67.361	76.078
BOX839	BOX839_G	12	268	243	183	68.284	75.309
BOX839	BOX839_G	13	255	239	180	70.588	75.314
BOX839	BOX839_G	14	237	227	173	72.996	76.211
BOX839	BOX839_G	15	224	215	170	75.893	79.07
BOX839	BOX839_G	16	218	206	166	76.147	80.583
BOX839	BOX839_G	17	213	204	167	78.404	81.863
BOX839	BOX839_G	18	210	195	161	76.667	82.564
BOX839	BOX839_G	19	207	190	157	75.845	82.632
BOX839	BOX839_G	20	200	187	155	77.5	82.888
BOX839	BOX839_G	21	194	185	151	77.835	81.622
BOX839	BOX839_G	22	188	185	148	78.723	80
BOX839	BOX839_G	23	182	181	147	80.769	81.215
BOX839	BOX839_G	24	177	179	146	82.486	81.564
BOX839	BOX839_G	25	174	174	145	83.333	83.333
BOX839	BOX839_G	30	158	173	142	89.873	82.081
BOX839	BOX839_G	35	153	168	136	88.889	80.952
BOX839	BOX839_G	40	147	167	131	89.116	78.443
BOX839	BOX839_G	45	142	163	127	89.437	77.914
BOX839	BOX839_G	50	140	162	125	89.286	77.16
BOX840	BOX840_A	1	2999	3234	1295	43.181	40.043
BOX840	BOX840_A	2	2214	1949	629	28.41	32.273
BOX840	BOX840_A	3	1137	942	225	19.789	23.885
BOX840	BOX840_A	4	691	629	115	16.643	18.283
BOX840	BOX840_A	5	532	534	100	18.797	18.727
BOX840	BOX840_A	6	465	458	83	17.849	18.122
BOX840	BOX840_A	7	451	417	71	15.743	17.026
BOX840	BOX840_A	8	433	383	63	14.55	16.449
BOX840	BOX840_A	9	417	343	54	12.95	15.743
BOX840	BOX840_A	10	399	327	51	12.782	15.596
BOX840	BOX840_A	11	376	313	40	10.638	12.78
BOX840	BOX840_A	12	365	291	33	9.041	11.34
BOX840	BOX840_A	13	347	273	34	9.798	12.454
BOX840	BOX840_A	14	325	257	30	9.231	11.673
BOX840	BOX840_A	15	315	256	25	7.937	9.766
BOX840	BOX840_A	16	307	252	24	7.818	9.524
BOX840	BOX840_A	17	282	242	18	6.383	7.438
BOX840	BOX840_A	18	271	238	16	5.904	6.723
BOX840	BOX840_A	19	268	230	11	4.104	4.783
BOX840	BOX840_A	20	262	227	9	3.435	3.965
BOX840	BOX840_A	21	252	226	8	3.175	3.54
BOX840	BOX840_A	22	242	223	6	2.479	2.691
BOX840	BOX840_A	23	235	221	4	1.702	1.81
BOX840	BOX840_A	24	225	216	1	0.444	0.463
BOX840	BOX840_A	25	213	216	1	0.469	0.463
BOX840	BOX840_A	30	186	216	1	0.538	0.463
BOX840	BOX840_A	35	168	214	1	0.595	0.467
BOX840	BOX840_A	40	155	210	1	0.645	0.476
BOX840	BOX840_A	45	149	207	1	0.671	0.483
BOX840	BOX840_A	50	143	202	1	0.699	0.495
BOX840	BOX840_B	1	4252	5282	2137	50.259	40.458
BOX840	BOX840_B	2	3640	2265	860	23.626	37.969
BOX840	BOX840_B	3	1933	619	144	7.45	23.263
BOX840	BOX840_B	4	1023	280	56	5.474	20
BOX840	BOX840_B	5	639	193	36	5.634	18.653
BOX840	BOX840_B	6	478	155	25	5.23	16.129
BOX840	BOX840_B	7	407	125	13	3.194	10.4
BOX840	BOX840_B	8	377	118	6	1.592	5.085
BOX840	BOX840_B	9	360	98	4	1.111	4.082
BOX840	BOX840_B	10	364	90	6	1.648	6.667
BOX840	BOX840_B	11	363	84	5	1.377	5.952
BOX840	BOX840_B	12	353	72	5	1.416	6.944
BOX840	BOX840_B	13	353	71	7	1.983	9.859
BOX840	BOX840_B	14	351	63	6	1.709	9.524
BOX840	BOX840_B	15	339	60	6	1.77	10
BOX840	BOX840_B	16	334	61	6	1.796	9.836
BOX840	BOX840_B	17	329	60	5	1.52	8.333
BOX840	BOX840_B	18	325	54	4	1.231	7.407
BOX840	BOX840_B	19	318	51	5	1.572	9.804
BOX840	BOX840_B	20	318	50	6	1.887	12
BOX840	BOX840_B	21	309	44	6	1.942	13.636
BOX840	BOX840_B	22	307	44	8	2.606	18.182
BOX840	BOX840_B	23	302	41	8	2.649	19.512
BOX840	BOX840_B	24	297	40	8	2.694	20
BOX840	BOX840_B	25	291	36	5	1.718	13.889
BOX840	BOX840_B	30	263	31	8	3.042	25.806
BOX840	BOX840_B	35	243	27	6	2.469	22.222
BOX840	BOX840_B	40	225	25	2	0.889	8
BOX840	BOX840_B	45	211	24	2	0.948	8.333
BOX840	BOX840_B	50	194	22	2	1.031	9.091
BOX840	BOX840_C	1	3808	3984	1713	44.984	42.997
BOX840	BOX840_C	2	3067	2012	780	25.432	38.767
BOX840	BOX840_C	3	1686	764	236	13.998	30.89
BOX840	BOX840_C	4	975	403	115	11.795	28.536
BOX840	BOX840_C	5	692	312	90	13.006	28.846
BOX840	BOX840_C	6	567	287	83	14.638	28.92
BOX840	BOX840_C	7	516	283	81	15.698	28.622
BOX840	BOX840_C	8	472	262	78	16.525	29.771
BOX840	BOX840_C	9	455	249	68	14.945	27.309
BOX840	BOX840_C	10	433	238	60	13.857	25.21
BOX840	BOX840_C	11	407	224	62	15.233	27.679
BOX840	BOX840_C	12	386	219	57	14.767	26.027
BOX840	BOX840_C	13	373	206	52	13.941	25.243
BOX840	BOX840_C	14	351	200	44	12.536	22
BOX840	BOX840_C	15	344	190	37	10.756	19.474
BOX840	BOX840_C	16	334	176	30	8.982	17.045
BOX840	BOX840_C	17	324	167	28	8.642	16.766
BOX840	BOX840_C	18	308	160	26	8.442	16.25
BOX840	BOX840_C	19	300	155	26	8.667	16.774
BOX840	BOX840_C	20	293	145	26	8.874	17.931
BOX840	BOX840_C	21	292	140	25	8.562	17.857
BOX840	BOX840_C	22	288	124	16	5.556	12.903
BOX840	BOX840_C	23	285	119	16	5.614	13.445
BOX840	BOX840_C	24	278	109	11	3.957	10.092
BOX840	BOX840_C	25	274	105	12	4.38	11.429
BOX840	BOX840_C	30	249	95	7	2.811	7.368
BOX840	BOX840_C	35	223	88	5	2.242	5.682
BOX840	BOX840_C	40	214	72	5	2.336	6.944
BOX840	BOX840_C	45	199	66	5	2.513	7.576
BOX840	BOX840_C	50	185	60	4	2.162	6.667
BOX840	BOX840_D	1	4318	5421	2274	52.663	41.948
BOX840	BOX840_D	2	3517	1892	744	21.154	39.323
BOX840	BOX840_D	3	1731	356	117	6.759	32.865
BOX840	BOX840_D	4	887	123	29	3.269	23.577
BOX840	BOX840_D	5	595	73	16	2.689	21.918
BOX840	BOX840_D	6	473	51	10	2.114	19.608
BOX840	BOX840_D	7	397	38	11	2.771	28.947
BOX840	BOX840_D	8	355	29	4	1.127	13.793
BOX840	BOX840_D	9	319	21	2	0.627	9.524
BOX840	BOX840_D	10	300	16	1	0.333	6.25
BOX840	BOX840_D	11	281	15	1	0.356	6.667
BOX840	BOX840_D	12	266	12	2	0.752	16.667
BOX840	BOX840_D	13	257	9	1	0.389	11.111
BOX840	BOX840_D	14	248	9	0	0	0
BOX840	BOX840_D	15	239	7	1	0.418	14.286
BOX840	BOX840_D	16	234	6	1	0.427	16.667
BOX840	BOX840_D	17	214	6	0	0	0
BOX840	BOX840_D	18	205	6	0	0	0
BOX840	BOX840_D	19	204	4	0	0	0
BOX840	BOX840_D	20	198	4	0	0	0
BOX840	BOX840_D	21	191	5	0	0	0
BOX840	BOX840_D	22	184	4	0	0	0
BOX840	BOX840_D	23	179	4	0	0	0
BOX840	BOX840_D	24	175	4	0	0	0
BOX840	BOX840_D	25	172	4	0	0	0
BOX840	BOX840_D	30	145	6	0	0	0
BOX840	BOX840_D	35	124	6	0	0	0
BOX840	BOX840_D	40	108	6	0	0	0
BOX840	BOX840_D	45	98	4	0	0	0
BOX840	BOX840_D	50	87	3	0	0	0
BOX840	BOX840_E	1	3024	3386	1436	47.487	42.41
BOX840	BOX840_E	2	1906	1995	584	30.64	29.273
BOX840	BOX840_E	3	741	693	117	15.789	16.883
BOX840	BOX840_E	4	391	301	41	10.486	13.621
BOX840	BOX840_E	5	294	206	22	7.483	10.68
BOX840	BOX840_E	6	259	179	20	7.722	11.173
BOX840	BOX840_E	7	243	156	20	8.23	12.821
BOX840	BOX840_E	8	230	132	20	8.696	15.152
BOX840	BOX840_E	9	218	116	19	8.716	16.379
BOX840	BOX840_E	10	209	106	17	8.134	16.038
BOX840	BOX840_E	11	199	92	13	6.533	14.13
BOX840	BOX840_E	12	187	84	12	6.417	14.286
BOX840	BOX840_E	13	184	75	8	4.348	10.667
BOX840	BOX840_E	14	184	69	5	2.717	7.246
BOX840	BOX840_E	15	182	60	5	2.747	8.333
BOX840	BOX840_E	16	173	60	4	2.312	6.667
BOX840	BOX840_E	17	172	58	3	1.744	5.172
BOX840	BOX840_E	18	168	56	3	1.786	5.357
BOX840	BOX840_E	19	165	55	3	1.818	5.455
BOX840	BOX840_E	20	160	55	3	1.875	5.455
BOX840	BOX840_E	21	151	54	2	1.325	3.704
BOX840	BOX840_E	22	147	52	2	1.361	3.846
BOX840	BOX840_E	23	143	53	3	2.098	5.66
BOX840	BOX840_E	24	137	55	3	2.19	5.455
BOX840	BOX840_E	25	132	54	3	2.273	5.556
BOX840	BOX840_E	30	104	57	2	1.923	3.509
BOX840	BOX840_E	35	84	52	0	0	0
BOX840	BOX840_E	40	70	47	0	0	0
BOX840	BOX840_E	45	53	45	0	0	0
BOX840	BOX840_E	50	41	47	0	0	0

## Sheet: Figure 6C
genotype	animal_num	threshold	ch1_spots	ch2_spots	coloc_spots	ch1_percent	ch2_percent
BOX766_EPI	BOX766_EPI_A	1	2836	1871	990	34.908	52.913
BOX766_EPI	BOX766_EPI_A	2	2311	1780	869	37.603	48.82
BOX766_EPI	BOX766_EPI_A	3	1048	1249	469	44.752	37.55
BOX766_EPI	BOX766_EPI_A	4	497	1008	336	67.606	33.333
BOX766_EPI	BOX766_EPI_A	5	302	841	236	78.146	28.062
BOX766_EPI	BOX766_EPI_A	6	216	717	183	84.722	25.523
BOX766_EPI	BOX766_EPI_A	7	168	625	146	86.905	23.36
BOX766_EPI	BOX766_EPI_A	8	125	562	113	90.4	20.107
BOX766_EPI	BOX766_EPI_A	9	93	506	86	92.473	16.996
BOX766_EPI	BOX766_EPI_A	10	71	471	66	92.958	14.013
BOX766_EPI	BOX766_EPI_A	11	54	423	50	92.593	11.82
BOX766_EPI	BOX766_EPI_A	12	47	394	44	93.617	11.168
BOX766_EPI	BOX766_EPI_A	13	37	366	35	94.595	9.563
BOX766_EPI	BOX766_EPI_A	14	28	339	26	92.857	7.67
BOX766_EPI	BOX766_EPI_A	15	24	308	23	95.833	7.468
BOX766_EPI	BOX766_EPI_A	16	19	286	17	89.474	5.944
BOX766_EPI	BOX766_EPI_A	17	15	269	14	93.333	5.204
BOX766_EPI	BOX766_EPI_A	18	14	247	13	92.857	5.263
BOX766_EPI	BOX766_EPI_A	19	10	225	9	90	4
BOX766_EPI	BOX766_EPI_A	20	9	206	8	88.889	3.883
BOX766_EPI	BOX766_EPI_A	21	8	188	7	87.5	3.723
BOX766_EPI	BOX766_EPI_A	22	7	181	6	85.714	3.315
BOX766_EPI	BOX766_EPI_A	23	6	163	6	100	3.681
BOX766_EPI	BOX766_EPI_A	24	6	159	6	100	3.774
BOX766_EPI	BOX766_EPI_A	25	5	150	5	100	3.333
BOX766_EPI	BOX766_EPI_A	30	1	110	1	100	0.909
BOX766_EPI	BOX766_EPI_A	35	1	85	1	100	1.176
BOX766_EPI	BOX766_EPI_A	40	0	68	0	NaN	0
BOX766_EPI	BOX766_EPI_A	45	0	53	0	NaN	0
BOX766_EPI	BOX766_EPI_A	50	0	50	0	NaN	0
BOX766_EPI	BOX766_EPI_B	1	1795	1592	781	43.51	49.058
BOX766_EPI	BOX766_EPI_B	2	1563	1326	696	44.53	52.489
BOX766_EPI	BOX766_EPI_B	3	1023	915	527	51.515	57.596
BOX766_EPI	BOX766_EPI_B	4	720	714	479	66.528	67.087
BOX766_EPI	BOX766_EPI_B	5	591	644	461	78.003	71.584
BOX766_EPI	BOX766_EPI_B	6	493	567	409	82.961	72.134
BOX766_EPI	BOX766_EPI_B	7	442	523	380	85.973	72.658
BOX766_EPI	BOX766_EPI_B	8	404	487	352	87.129	72.279
BOX766_EPI	BOX766_EPI_B	9	367	474	333	90.736	70.253
BOX766_EPI	BOX766_EPI_B	10	339	449	315	92.92	70.156
BOX766_EPI	BOX766_EPI_B	11	321	424	304	94.704	71.698
BOX766_EPI	BOX766_EPI_B	12	299	398	281	93.98	70.603
BOX766_EPI	BOX766_EPI_B	13	287	383	272	94.774	71.018
BOX766_EPI	BOX766_EPI_B	14	268	367	256	95.522	69.755
BOX766_EPI	BOX766_EPI_B	15	247	339	237	95.951	69.912
BOX766_EPI	BOX766_EPI_B	16	243	323	232	95.473	71.827
BOX766_EPI	BOX766_EPI_B	17	232	305	219	94.397	71.803
BOX766_EPI	BOX766_EPI_B	18	219	295	206	94.064	69.831
BOX766_EPI	BOX766_EPI_B	19	200	278	188	94	67.626
BOX766_EPI	BOX766_EPI_B	20	187	269	180	96.257	66.914
BOX766_EPI	BOX766_EPI_B	21	176	254	168	95.455	66.142
BOX766_EPI	BOX766_EPI_B	22	169	245	162	95.858	66.122
BOX766_EPI	BOX766_EPI_B	23	164	237	158	96.341	66.667
BOX766_EPI	BOX766_EPI_B	24	155	225	150	96.774	66.667
BOX766_EPI	BOX766_EPI_B	25	148	220	143	96.622	65
BOX766_EPI	BOX766_EPI_B	30	122	181	115	94.262	63.536
BOX766_EPI	BOX766_EPI_B	35	104	159	98	94.231	61.635
BOX766_EPI	BOX766_EPI_B	40	83	131	77	92.771	58.779
BOX766_EPI	BOX766_EPI_B	45	67	113	65	97.015	57.522
BOX766_EPI	BOX766_EPI_B	50	60	95	57	95	60
BOX766_INT	BOX766_INT_A	1	2600	2507	1107	42.577	44.156
BOX766_INT	BOX766_INT_A	2	2490	2200	1045	41.968	47.5
BOX766_INT	BOX766_INT_A	3	1642	1407	702	42.753	49.893
BOX766_INT	BOX766_INT_A	4	1091	987	579	53.071	58.663
BOX766_INT	BOX766_INT_A	5	831	768	500	60.168	65.104
BOX766_INT	BOX766_INT_A	6	698	632	449	64.327	71.044
BOX766_INT	BOX766_INT_A	7	624	559	423	67.788	75.671
BOX766_INT	BOX766_INT_A	8	550	517	400	72.727	77.369
BOX766_INT	BOX766_INT_A	9	496	477	378	76.21	79.245
BOX766_INT	BOX766_INT_A	10	463	450	366	79.05	81.333
BOX766_INT	BOX766_INT_A	11	429	423	348	81.119	82.27
BOX766_INT	BOX766_INT_A	12	416	399	342	82.212	85.714
BOX766_INT	BOX766_INT_A	13	394	381	317	80.457	83.202
BOX766_INT	BOX766_INT_A	14	371	359	300	80.863	83.565
BOX766_INT	BOX766_INT_A	15	355	345	289	81.408	83.768
BOX766_INT	BOX766_INT_A	16	338	334	279	82.544	83.533
BOX766_INT	BOX766_INT_A	17	327	323	270	82.569	83.591
BOX766_INT	BOX766_INT_A	18	310	307	254	81.935	82.736
BOX766_INT	BOX766_INT_A	19	297	290	243	81.818	83.793
BOX766_INT	BOX766_INT_A	20	288	284	237	82.292	83.451
BOX766_INT	BOX766_INT_A	21	282	275	230	81.56	83.636
BOX766_INT	BOX766_INT_A	22	274	260	221	80.657	85
BOX766_INT	BOX766_INT_A	23	265	254	213	80.377	83.858
BOX766_INT	BOX766_INT_A	24	258	249	206	79.845	82.731
BOX766_INT	BOX766_INT_A	25	246	239	201	81.707	84.1
BOX766_INT	BOX766_INT_A	30	209	186	162	77.512	87.097
BOX766_INT	BOX766_INT_A	35	179	167	141	78.771	84.431
BOX766_INT	BOX766_INT_A	40	159	142	121	76.101	85.211
BOX766_INT	BOX766_INT_A	45	134	113	100	74.627	88.496
BOX766_INT	BOX766_INT_A	50	124	104	92	74.194	88.462
BOX766_INT	BOX766_INT_B	1	2712	2242	993	36.615	44.291
BOX766_INT	BOX766_INT_B	2	2871	2268	1104	38.454	48.677
BOX766_INT	BOX766_INT_B	3	2141	1909	856	39.981	44.84
BOX766_INT	BOX766_INT_B	4	1598	1565	705	44.118	45.048
BOX766_INT	BOX766_INT_B	5	1275	1368	646	50.667	47.222
BOX766_INT	BOX766_INT_B	6	1092	1186	580	53.114	48.904
BOX766_INT	BOX766_INT_B	7	944	1086	534	56.568	49.171
BOX766_INT	BOX766_INT_B	8	845	987	491	58.107	49.747
BOX766_INT	BOX766_INT_B	9	766	903	462	60.313	51.163
BOX766_INT	BOX766_INT_B	10	708	831	433	61.158	52.106
BOX766_INT	BOX766_INT_B	11	656	785	421	64.177	53.631
BOX766_INT	BOX766_INT_B	12	623	739	410	65.811	55.48
BOX766_INT	BOX766_INT_B	13	591	707	394	66.667	55.728
BOX766_INT	BOX766_INT_B	14	559	685	384	68.694	56.058
BOX766_INT	BOX766_INT_B	15	537	656	376	70.019	57.317
BOX766_INT	BOX766_INT_B	16	515	625	369	71.65	59.04
BOX766_INT	BOX766_INT_B	17	494	614	362	73.279	58.958
BOX766_INT	BOX766_INT_B	18	482	593	354	73.444	59.696
BOX766_INT	BOX766_INT_B	19	472	579	348	73.729	60.104
BOX766_INT	BOX766_INT_B	20	454	567	340	74.89	59.965
BOX766_INT	BOX766_INT_B	21	443	553	334	75.395	60.398
BOX766_INT	BOX766_INT_B	22	428	545	328	76.636	60.183
BOX766_INT	BOX766_INT_B	23	423	531	325	76.832	61.205
BOX766_INT	BOX766_INT_B	24	417	511	322	77.218	63.014
BOX766_INT	BOX766_INT_B	25	408	506	325	79.657	64.229
BOX766_INT	BOX766_INT_B	30	374	460	287	76.738	62.391
BOX766_INT	BOX766_INT_B	35	339	423	279	82.301	65.957
BOX766_INT	BOX766_INT_B	40	311	379	256	82.315	67.546
BOX766_INT	BOX766_INT_B	45	292	360	241	82.534	66.944
BOX766_INT	BOX766_INT_B	50	283	332	234	82.686	70.482
BOX786_INT	BOX786_INT_A	1	5662	4332	1981	34.988	45.729
BOX786_INT	BOX786_INT_A	2	4550	2176	798	17.538	36.673
BOX786_INT	BOX786_INT_A	3	1767	1339	214	12.111	15.982
BOX786_INT	BOX786_INT_A	4	666	1063	72	10.811	6.773
BOX786_INT	BOX786_INT_A	5	378	934	54	14.286	5.782
BOX786_INT	BOX786_INT_A	6	274	848	35	12.774	4.127
BOX786_INT	BOX786_INT_A	7	213	777	23	10.798	2.96
BOX786_INT	BOX786_INT_A	8	180	720	18	10	2.5
BOX786_INT	BOX786_INT_A	9	146	653	14	9.589	2.144
BOX786_INT	BOX786_INT_A	10	119	608	9	7.563	1.48
BOX786_INT	BOX786_INT_A	11	107	583	6	5.607	1.029
BOX786_INT	BOX786_INT_A	12	93	557	7	7.527	1.257
BOX786_INT	BOX786_INT_A	13	77	520	6	7.792	1.154
BOX786_INT	BOX786_INT_A	14	68	511	6	8.824	1.174
BOX786_INT	BOX786_INT_A	15	63	485	5	7.937	1.031
BOX786_INT	BOX786_INT_A	16	56	458	4	7.143	0.873
BOX786_INT	BOX786_INT_A	17	57	450	3	5.263	0.667
BOX786_INT	BOX786_INT_A	18	56	435	3	5.357	0.69
BOX786_INT	BOX786_INT_A	19	54	420	1	1.852	0.238
BOX786_INT	BOX786_INT_A	20	43	406	1	2.326	0.246
BOX786_INT	BOX786_INT_A	21	35	397	1	2.857	0.252
BOX786_INT	BOX786_INT_A	22	25	386	1	4	0.259
BOX786_INT	BOX786_INT_A	23	20	374	1	5	0.267
BOX786_INT	BOX786_INT_A	24	18	368	1	5.556	0.272
BOX786_INT	BOX786_INT_A	25	13	357	0	0	0
BOX786_INT	BOX786_INT_A	30	3	319	0	0	0
BOX786_INT	BOX786_INT_A	35	0	275	0	NaN	0
BOX786_INT	BOX786_INT_A	40	0	251	0	NaN	0
BOX786_INT	BOX786_INT_A	45	0	226	0	NaN	0
BOX786_INT	BOX786_INT_A	50	0	198	0	NaN	0
BOX786_INT	BOX786_INT_B	1	6722	4746	2169	32.267	45.702
BOX786_INT	BOX786_INT_B	2	3716	2566	628	16.9	24.474
BOX786_INT	BOX786_INT_B	3	1395	1775	184	13.19	10.366
BOX786_INT	BOX786_INT_B	4	785	1458	96	12.229	6.584
BOX786_INT	BOX786_INT_B	5	586	1249	65	11.092	5.204
BOX786_INT	BOX786_INT_B	6	464	1149	36	7.759	3.133
BOX786_INT	BOX786_INT_B	7	411	1044	29	7.056	2.778
BOX786_INT	BOX786_INT_B	8	356	992	21	5.899	2.117
BOX786_INT	BOX786_INT_B	9	309	944	19	6.149	2.013
BOX786_INT	BOX786_INT_B	10	272	907	14	5.147	1.544
BOX786_INT	BOX786_INT_B	11	249	873	15	6.024	1.718
BOX786_INT	BOX786_INT_B	12	200	836	11	5.5	1.316
BOX786_INT	BOX786_INT_B	13	152	802	5	3.289	0.623
BOX786_INT	BOX786_INT_B	14	126	774	2	1.587	0.258
BOX786_INT	BOX786_INT_B	15	85	754	2	2.353	0.265
BOX786_INT	BOX786_INT_B	16	64	737	1	1.562	0.136
BOX786_INT	BOX786_INT_B	17	40	723	1	2.5	0.138
BOX786_INT	BOX786_INT_B	18	27	703	0	0	0
BOX786_INT	BOX786_INT_B	19	18	699	0	0	0
BOX786_INT	BOX786_INT_B	20	11	682	0	0	0
BOX786_INT	BOX786_INT_B	21	4	660	0	0	0
BOX786_INT	BOX786_INT_B	22	2	639	0	0	0
BOX786_INT	BOX786_INT_B	23	2	634	0	0	0
BOX786_INT	BOX786_INT_B	24	2	630	0	0	0
BOX786_INT	BOX786_INT_B	25	2	622	0	0	0
BOX786_INT	BOX786_INT_B	30	2	578	0	0	0
BOX786_INT	BOX786_INT_B	35	1	506	0	0	0
BOX786_INT	BOX786_INT_B	40	0	465	0	NaN	0
BOX786_INT	BOX786_INT_B	45	0	429	0	NaN	0
BOX786_INT	BOX786_INT_B	50	0	398	0	NaN	0

## Sheet: Figure S2A
genotype	animal_num	threshold	ch1_spots	ch2_spots	coloc_spots	ch1_percent	ch2_percent
BOX760	BOX760_A	1	1120	1318	672	60	50.986
BOX760	BOX760_A	2	1079	1098	578	53.568	52.641
BOX760	BOX760_A	3	993	966	554	55.791	57.35
BOX760	BOX760_A	4	943	849	528	55.992	62.191
BOX760	BOX760_A	5	934	773	508	54.39	65.718
BOX760	BOX760_A	6	951	688	473	49.737	68.75
BOX760	BOX760_A	7	945	603	445	47.09	73.798
BOX760	BOX760_A	8	935	536	424	45.348	79.104
BOX760	BOX760_A	9	896	487	388	43.304	79.671
BOX760	BOX760_A	10	870	458	370	42.529	80.786
BOX760	BOX760_A	11	840	419	345	41.071	82.339
BOX760	BOX760_A	12	811	401	336	41.43	83.791
BOX760	BOX760_A	13	785	380	320	40.764	84.211
BOX760	BOX760_A	14	767	368	306	39.896	83.152
BOX760	BOX760_A	15	741	352	295	39.811	83.807
BOX760	BOX760_A	16	715	339	282	39.441	83.186
BOX760	BOX760_A	17	690	323	273	39.565	84.52
BOX760	BOX760_A	18	670	309	263	39.254	85.113
BOX760	BOX760_A	19	654	300	260	39.755	86.667
BOX760	BOX760_A	20	634	291	254	40.063	87.285
BOX760	BOX760_A	21	624	282	250	40.064	88.652
BOX760	BOX760_A	22	607	269	237	39.044	88.104
BOX760	BOX760_A	23	591	262	230	38.917	87.786
BOX760	BOX760_A	24	579	258	226	39.033	87.597
BOX760	BOX760_A	25	564	252	222	39.362	88.095
BOX760	BOX760_A	30	516	215	194	37.597	90.233
BOX760	BOX760_A	35	482	182	166	34.44	91.209
BOX760	BOX760_A	40	437	161	146	33.41	90.683
BOX760	BOX760_A	45	411	143	132	32.117	92.308
BOX760	BOX760_A	50	382	131	121	31.675	92.366
BOX760	BOX760_B	1	981	1267	577	58.818	45.541
BOX760	BOX760_B	2	995	1108	578	58.09	52.166
BOX760	BOX760_B	3	919	948	502	54.625	52.954
BOX760	BOX760_B	4	875	875	479	54.743	54.743
BOX760	BOX760_B	5	856	827	465	54.322	56.227
BOX760	BOX760_B	6	859	781	471	54.831	60.307
BOX760	BOX760_B	7	857	732	458	53.442	62.568
BOX760	BOX760_B	8	860	668	444	51.628	66.467
BOX760	BOX760_B	9	860	597	413	48.023	69.179
BOX760	BOX760_B	10	852	549	393	46.127	71.585
BOX760	BOX760_B	11	847	505	378	44.628	74.851
BOX760	BOX760_B	12	836	475	362	43.301	76.211
BOX760	BOX760_B	13	842	450	351	41.686	78
BOX760	BOX760_B	14	838	422	339	40.453	80.332
BOX760	BOX760_B	15	832	399	328	39.423	82.206
BOX760	BOX760_B	16	821	376	307	37.393	81.649
BOX760	BOX760_B	17	819	360	294	35.897	81.667
BOX760	BOX760_B	18	803	331	274	34.122	82.779
BOX760	BOX760_B	19	790	312	266	33.671	85.256
BOX760	BOX760_B	20	779	300	263	33.761	87.667
BOX760	BOX760_B	21	765	279	245	32.026	87.814
BOX760	BOX760_B	22	753	269	235	31.208	87.361
BOX760	BOX760_B	23	741	259	227	30.634	87.645
BOX760	BOX760_B	24	730	247	215	29.452	87.045
BOX760	BOX760_B	25	713	239	211	29.593	88.285
BOX760	BOX760_B	30	657	210	190	28.919	90.476
BOX760	BOX760_B	35	590	180	162	27.458	90
BOX760	BOX760_B	40	535	152	140	26.168	92.105
BOX760	BOX760_B	45	501	129	118	23.553	91.473
BOX760	BOX760_B	50	469	116	104	22.175	89.655
BOX760	BOX760_C	1	446	690	235	52.691	34.058
BOX760	BOX760_C	2	545	804	280	51.376	34.826
BOX760	BOX760_C	3	600	643	250	41.667	38.88
BOX760	BOX760_C	4	647	510	222	34.312	43.529
BOX760	BOX760_C	5	693	407	198	28.571	48.649
BOX760	BOX760_C	6	701	321	160	22.825	49.844
BOX760	BOX760_C	7	699	248	124	17.74	50
BOX760	BOX760_C	8	685	196	102	14.891	52.041
BOX760	BOX760_C	9	642	144	78	12.15	54.167
BOX760	BOX760_C	10	596	115	63	10.57	54.783
BOX760	BOX760_C	11	562	100	60	10.676	60
BOX760	BOX760_C	12	545	82	56	10.275	68.293
BOX760	BOX760_C	13	522	70	51	9.77	72.857
BOX760	BOX760_C	14	491	66	48	9.776	72.727
BOX760	BOX760_C	15	459	62	46	10.022	74.194
BOX760	BOX760_C	16	432	51	40	9.259	78.431
BOX760	BOX760_C	17	405	47	40	9.877	85.106
BOX760	BOX760_C	18	386	42	36	9.326	85.714
BOX760	BOX760_C	19	365	41	35	9.589	85.366
BOX760	BOX760_C	20	340	40	33	9.706	82.5
BOX760	BOX760_C	21	319	40	34	10.658	85
BOX760	BOX760_C	22	298	36	31	10.403	86.111
BOX760	BOX760_C	23	280	34	29	10.357	85.294
BOX760	BOX760_C	24	265	33	28	10.566	84.848
BOX760	BOX760_C	25	248	32	27	10.887	84.375
BOX760	BOX760_C	30	187	23	21	11.23	91.304
BOX760	BOX760_C	35	144	19	17	11.806	89.474
BOX760	BOX760_C	40	111	18	16	14.414	88.889
BOX760	BOX760_C	45	90	15	13	14.444	86.667
BOX760	BOX760_C	50	82	12	10	12.195	83.333
BOX760	BOX760_D	1	902	1094	373	41.353	34.095
BOX760	BOX760_D	2	1171	1197	525	44.833	43.86
BOX760	BOX760_D	3	1068	853	376	35.206	44.08
BOX760	BOX760_D	4	838	544	232	27.685	42.647
BOX760	BOX760_D	5	648	350	175	27.006	50
BOX760	BOX760_D	6	520	282	158	30.385	56.028
BOX760	BOX760_D	7	447	242	145	32.438	59.917
BOX760	BOX760_D	8	389	224	132	33.933	58.929
BOX760	BOX760_D	9	359	208	124	34.54	59.615
BOX760	BOX760_D	10	325	189	111	34.154	58.73
BOX760	BOX760_D	11	297	171	102	34.343	59.649
BOX760	BOX760_D	12	283	159	96	33.922	60.377
BOX760	BOX760_D	13	260	147	98	37.692	66.667
BOX760	BOX760_D	14	253	140	97	38.34	69.286
BOX760	BOX760_D	15	248	131	92	37.097	70.229
BOX760	BOX760_D	16	236	128	88	37.288	68.75
BOX760	BOX760_D	17	232	119	82	35.345	68.908
BOX760	BOX760_D	18	225	112	78	34.667	69.643
BOX760	BOX760_D	19	221	104	75	33.937	72.115
BOX760	BOX760_D	20	202	100	74	36.634	74
BOX760	BOX760_D	21	195	94	73	37.436	77.66
BOX760	BOX760_D	22	184	93	73	39.674	78.495
BOX760	BOX760_D	23	178	92	73	41.011	79.348
BOX760	BOX760_D	24	172	87	70	40.698	80.46
BOX760	BOX760_D	25	166	85	69	41.566	81.176
BOX760	BOX760_D	30	139	73	63	45.324	86.301
BOX760	BOX760_D	35	117	62	56	47.863	90.323
BOX760	BOX760_D	40	107	55	51	47.664	92.727
BOX760	BOX760_D	45	97	51	46	47.423	90.196
BOX760	BOX760_D	50	95	43	41	43.158	95.349
BOX761	BOX761_A	1	2047	2451	929	45.383	37.903
BOX761	BOX761_A	2	2436	2699	1174	48.194	43.498
BOX761	BOX761_A	3	1896	1734	685	36.129	39.504
BOX761	BOX761_A	4	1312	1081	453	34.527	41.906
BOX761	BOX761_A	5	1012	735	326	32.213	44.354
BOX761	BOX761_A	6	824	526	259	31.432	49.24
BOX761	BOX761_A	7	724	396	214	29.558	54.04
BOX761	BOX761_A	8	645	314	176	27.287	56.051
BOX761	BOX761_A	9	574	252	150	26.132	59.524
BOX761	BOX761_A	10	519	216	118	22.736	54.63
BOX761	BOX761_A	11	479	178	105	21.921	58.989
BOX761	BOX761_A	12	425	166	105	24.706	63.253
BOX761	BOX761_A	13	375	147	84	22.4	57.143
BOX761	BOX761_A	14	342	129	80	23.392	62.016
BOX761	BOX761_A	15	318	117	73	22.956	62.393
BOX761	BOX761_A	16	298	95	64	21.477	67.368
BOX761	BOX761_A	17	278	83	54	19.424	65.06
BOX761	BOX761_A	18	254	77	52	20.472	67.532
BOX761	BOX761_A	19	240	66	45	18.75	68.182
BOX761	BOX761_A	20	228	63	45	19.737	71.429
BOX761	BOX761_A	21	214	60	45	21.028	75
BOX761	BOX761_A	22	202	55	36	17.822	65.455
BOX761	BOX761_A	23	193	45	28	14.508	62.222
BOX761	BOX761_A	24	186	42	27	14.516	64.286
BOX761	BOX761_A	25	179	36	23	12.849	63.889
BOX761	BOX761_A	30	139	20	13	9.353	65
BOX761	BOX761_A	35	107	9	6	5.607	66.667
BOX761	BOX761_A	40	83	6	5	6.024	83.333
BOX761	BOX761_A	45	71	4	4	5.634	100
BOX761	BOX761_A	50	59	4	4	6.78	100
BOX761	BOX761_B	1	1956	2183	1021	52.198	46.77
BOX761	BOX761_B	2	1250	1173	415	33.2	35.379
BOX761	BOX761_B	3	674	527	229	33.976	43.454
BOX761	BOX761_B	4	543	440	222	40.884	50.455
BOX761	BOX761_B	5	517	428	205	39.652	47.897
BOX761	BOX761_B	6	508	361	165	32.48	45.706
BOX761	BOX761_B	7	500	299	155	31	51.839
BOX761	BOX761_B	8	467	228	124	26.552	54.386
BOX761	BOX761_B	9	425	186	98	23.059	52.688
BOX761	BOX761_B	10	407	146	81	19.902	55.479
BOX761	BOX761_B	11	397	111	72	18.136	64.865
BOX761	BOX761_B	12	371	91	58	15.633	63.736
BOX761	BOX761_B	13	339	84	56	16.519	66.667
BOX761	BOX761_B	14	318	68	43	13.522	63.235
BOX761	BOX761_B	15	289	61	42	14.533	68.852
BOX761	BOX761_B	16	286	47	34	11.888	72.34
BOX761	BOX761_B	17	273	42	31	11.355	73.81
BOX761	BOX761_B	18	254	38	29	11.417	76.316
BOX761	BOX761_B	19	245	31	24	9.796	77.419
BOX761	BOX761_B	20	235	29	22	9.362	75.862
BOX761	BOX761_B	21	215	25	22	10.233	88
BOX761	BOX761_B	22	204	20	17	8.333	85
BOX761	BOX761_B	23	196	17	15	7.653	88.235
BOX761	BOX761_B	24	187	16	14	7.487	87.5
BOX761	BOX761_B	25	177	13	12	6.78	92.308
BOX761	BOX761_B	30	145	7	6	4.138	85.714
BOX761	BOX761_B	35	120	3	2	1.667	66.667
BOX761	BOX761_B	40	98	1	0	0	0
BOX761	BOX761_B	45	88	1	0	0	0
BOX761	BOX761_B	50	71	1	0	0	0
BOX761	BOX761_C	1	1631	2083	756	46.352	36.294
BOX761	BOX761_C	2	1801	1886	689	38.257	36.532
BOX761	BOX761_C	3	1400	1209	413	29.5	34.16
BOX761	BOX761_C	4	1116	934	351	31.452	37.58
BOX761	BOX761_C	5	899	739	299	33.259	40.46
BOX761	BOX761_C	6	788	617	274	34.772	44.408
BOX761	BOX761_C	7	701	513	238	33.951	46.394
BOX761	BOX761_C	8	637	431	209	32.81	48.492
BOX761	BOX761_C	9	575	369	174	30.261	47.154
BOX761	BOX761_C	10	533	322	157	29.456	48.758
BOX761	BOX761_C	11	498	289	148	29.719	51.211
BOX761	BOX761_C	12	461	251	142	30.803	56.574
BOX761	BOX761_C	13	427	218	123	28.806	56.422
BOX761	BOX761_C	14	397	178	97	24.433	54.494
BOX761	BOX761_C	15	367	154	73	19.891	47.403
BOX761	BOX761_C	16	337	127	68	20.178	53.543
BOX761	BOX761_C	17	323	106	55	17.028	51.887
BOX761	BOX761_C	18	308	92	46	14.935	50
BOX761	BOX761_C	19	293	77	36	12.287	46.753
BOX761	BOX761_C	20	275	62	30	10.909	48.387
BOX761	BOX761_C	21	268	48	28	10.448	58.333
BOX761	BOX761_C	22	257	45	27	10.506	60
BOX761	BOX761_C	23	252	35	20	7.937	57.143
BOX761	BOX761_C	24	238	28	18	7.563	64.286
BOX761	BOX761_C	25	229	27	19	8.297	70.37
BOX761	BOX761_C	30	173	14	8	4.624	57.143
BOX761	BOX761_C	35	140	7	3	2.143	42.857
BOX761	BOX761_C	40	110	4	1	0.909	25
BOX761	BOX761_C	45	87	4	1	1.149	25
BOX761	BOX761_C	50	72	2	0	0	0
BOX761	BOX761_D	1	880	973	366	41.591	37.616
BOX761	BOX761_D	2	975	947	375	38.462	39.599
BOX761	BOX761_D	3	789	657	261	33.08	39.726
BOX761	BOX761_D	4	563	475	201	35.702	42.316
BOX761	BOX761_D	5	406	353	147	36.207	41.643
BOX761	BOX761_D	6	277	260	98	35.379	37.692
BOX761	BOX761_D	7	192	170	57	29.688	33.529
BOX761	BOX761_D	8	138	111	42	30.435	37.838
BOX761	BOX761_D	9	103	82	29	28.155	35.366
BOX761	BOX761_D	10	89	67	26	29.213	38.806
BOX761	BOX761_D	11	74	54	21	28.378	38.889
BOX761	BOX761_D	12	65	39	16	24.615	41.026
BOX761	BOX761_D	13	61	28	13	21.311	46.429
BOX761	BOX761_D	14	58	22	10	17.241	45.455
BOX761	BOX761_D	15	53	18	8	15.094	44.444
BOX761	BOX761_D	16	47	12	5	10.638	41.667
BOX761	BOX761_D	17	45	12	5	11.111	41.667
BOX761	BOX761_D	18	40	9	3	7.5	33.333
BOX761	BOX761_D	19	35	7	2	5.714	28.571
BOX761	BOX761_D	20	35	2	1	2.857	50
BOX761	BOX761_D	21	32	1	1	3.125	100
BOX761	BOX761_D	22	30	1	1	3.333	100
BOX761	BOX761_D	23	27	1	1	3.704	100
BOX761	BOX761_D	24	24	0	0	0	NaN
BOX761	BOX761_D	25	24	0	0	0	NaN
BOX761	BOX761_D	30	19	0	0	0	NaN
BOX761	BOX761_D	35	12	0	0	0	NaN
BOX761	BOX761_D	40	8	0	0	0	NaN
BOX761	BOX761_D	45	6	0	0	0	NaN
BOX761	BOX761_D	50	5	0	0	0	NaN
BOX761	BOX761_E	1	899	858	372	41.379	43.357
BOX761	BOX761_E	2	683	523	251	36.75	47.992
BOX761	BOX761_E	3	538	325	165	30.669	50.769
BOX761	BOX761_E	4	405	231	108	26.667	46.753
BOX761	BOX761_E	5	318	166	65	20.44	39.157
BOX761	BOX761_E	6	250	137	53	21.2	38.686
BOX761	BOX761_E	7	198	109	40	20.202	36.697
BOX761	BOX761_E	8	152	82	24	15.789	29.268
BOX761	BOX761_E	9	106	62	16	15.094	25.806
BOX761	BOX761_E	10	83	45	11	13.253	24.444
BOX761	BOX761_E	11	70	30	7	10	23.333
BOX761	BOX761_E	12	62	23	5	8.065	21.739
BOX761	BOX761_E	13	50	18	5	10	27.778
BOX761	BOX761_E	14	39	16	4	10.256	25
BOX761	BOX761_E	15	33	15	3	9.091	20
BOX761	BOX761_E	16	29	14	3	10.345	21.429
BOX761	BOX761_E	17	25	12	3	12	25
BOX761	BOX761_E	18	23	12	3	13.043	25
BOX761	BOX761_E	19	17	11	2	11.765	18.182
BOX761	BOX761_E	20	16	10	2	12.5	20
BOX761	BOX761_E	21	14	8	1	7.143	12.5
BOX761	BOX761_E	22	12	8	1	8.333	12.5
BOX761	BOX761_E	23	11	7	1	9.091	14.286
BOX761	BOX761_E	24	9	7	1	11.111	14.286
BOX761	BOX761_E	25	9	6	0	0	0
BOX761	BOX761_E	30	7	6	0	0	0
BOX761	BOX761_E	35	5	5	0	0	0
BOX761	BOX761_E	40	5	4	0	0	0
BOX761	BOX761_E	45	5	3	0	0	0
BOX761	BOX761_E	50	3	2	0	0	0
BOX834	BOX834_A	1	3086	3072	1034	33.506	33.659
BOX834	BOX834_A	2	3386	3704	1369	40.431	36.96
BOX834	BOX834_A	3	2530	2543	743	29.368	29.217
BOX834	BOX834_A	4	1739	1451	284	16.331	19.573
BOX834	BOX834_A	5	1264	908	134	10.601	14.758
BOX834	BOX834_A	6	981	603	70	7.136	11.609
BOX834	BOX834_A	7	830	439	40	4.819	9.112
BOX834	BOX834_A	8	729	342	37	5.075	10.819
BOX834	BOX834_A	9	675	280	31	4.593	11.071
BOX834	BOX834_A	10	634	241	29	4.574	12.033
BOX834	BOX834_A	11	597	205	26	4.355	12.683
BOX834	BOX834_A	12	574	180	17	2.962	9.444
BOX834	BOX834_A	13	551	179	15	2.722	8.38
BOX834	BOX834_A	14	539	158	15	2.783	9.494
BOX834	BOX834_A	15	535	143	15	2.804	10.49
BOX834	BOX834_A	16	528	128	11	2.083	8.594
BOX834	BOX834_A	17	523	116	9	1.721	7.759
BOX834	BOX834_A	18	522	104	8	1.533	7.692
BOX834	BOX834_A	19	510	95	8	1.569	8.421
BOX834	BOX834_A	20	506	89	7	1.383	7.865
BOX834	BOX834_A	21	502	77	5	0.996	6.494
BOX834	BOX834_A	22	497	69	5	1.006	7.246
BOX834	BOX834_A	23	492	69	5	1.016	7.246
BOX834	BOX834_A	24	484	61	5	1.033	8.197
BOX834	BOX834_A	25	477	56	3	0.629	5.357
BOX834	BOX834_A	30	461	26	2	0.434	7.692
BOX834	BOX834_A	35	441	19	1	0.227	5.263
BOX834	BOX834_A	40	421	15	0	0	0
BOX834	BOX834_A	45	404	15	0	0	0
BOX834	BOX834_A	50	382	14	0	0	0
BOX834	BOX834_B	1	2556	2241	987	38.615	44.043
BOX834	BOX834_B	2	2152	2837	1041	48.374	36.694
BOX834	BOX834_B	3	1069	1770	357	33.396	20.169
BOX834	BOX834_B	4	569	839	110	19.332	13.111
BOX834	BOX834_B	5	344	393	30	8.721	7.634
BOX834	BOX834_B	6	253	203	8	3.162	3.941
BOX834	BOX834_B	7	203	139	5	2.463	3.597
BOX834	BOX834_B	8	170	92	4	2.353	4.348
BOX834	BOX834_B	9	155	72	3	1.935	4.167
BOX834	BOX834_B	10	137	52	2	1.46	3.846
BOX834	BOX834_B	11	131	38	3	2.29	7.895
BOX834	BOX834_B	12	128	27	3	2.344	11.111
BOX834	BOX834_B	13	119	21	2	1.681	9.524
BOX834	BOX834_B	14	112	18	1	0.893	5.556
BOX834	BOX834_B	15	107	15	1	0.935	6.667
BOX834	BOX834_B	16	101	13	1	0.99	7.692
BOX834	BOX834_B	17	95	11	0	0	0
BOX834	BOX834_B	18	87	10	0	0	0
BOX834	BOX834_B	19	84	6	0	0	0
BOX834	BOX834_B	20	81	5	0	0	0
BOX834	BOX834_B	21	78	4	0	0	0
BOX834	BOX834_B	22	78	2	0	0	0
BOX834	BOX834_B	23	77	2	0	0	0
BOX834	BOX834_B	24	74	2	0	0	0
BOX834	BOX834_B	25	72	2	0	0	0
BOX834	BOX834_B	30	63	2	0	0	0
BOX834	BOX834_B	35	56	0	0	0	NaN
BOX834	BOX834_B	40	49	0	0	0	NaN
BOX834	BOX834_B	45	38	0	0	0	NaN
BOX834	BOX834_B	50	33	0	0	0	NaN
BOX834	BOX834_C	1	1249	1248	437	34.988	35.016
BOX834	BOX834_C	2	895	1479	365	40.782	24.679
BOX834	BOX834_C	3	482	873	134	27.801	15.349
BOX834	BOX834_C	4	356	445	54	15.169	12.135
BOX834	BOX834_C	5	308	216	11	3.571	5.093
BOX834	BOX834_C	6	272	147	7	2.574	4.762
BOX834	BOX834_C	7	247	115	4	1.619	3.478
BOX834	BOX834_C	8	231	96	2	0.866	2.083
BOX834	BOX834_C	9	209	91	1	0.478	1.099
BOX834	BOX834_C	10	203	83	1	0.493	1.205
BOX834	BOX834_C	11	194	72	0	0	0
BOX834	BOX834_C	12	185	67	0	0	0
BOX834	BOX834_C	13	180	63	0	0	0
BOX834	BOX834_C	14	175	61	0	0	0
BOX834	BOX834_C	15	170	58	0	0	0
BOX834	BOX834_C	16	167	53	0	0	0
BOX834	BOX834_C	17	165	52	1	0.606	1.923
BOX834	BOX834_C	18	164	52	0	0	0
BOX834	BOX834_C	19	162	47	0	0	0
BOX834	BOX834_C	20	162	50	0	0	0
BOX834	BOX834_C	21	160	44	0	0	0
BOX834	BOX834_C	22	161	45	0	0	0
BOX834	BOX834_C	23	159	43	1	0.629	2.326
BOX834	BOX834_C	24	161	41	1	0.621	2.439
BOX834	BOX834_C	25	157	42	1	0.637	2.381
BOX834	BOX834_C	30	146	32	0	0	0
BOX834	BOX834_C	35	143	24	0	0	0
BOX834	BOX834_C	40	142	22	0	0	0
BOX834	BOX834_C	45	136	13	0	0	0
BOX834	BOX834_C	50	131	10	0	0	0
BOX834	BOX834_D	1	565	1347	202	35.752	14.996
BOX834	BOX834_D	2	722	1748	331	45.845	18.936
BOX834	BOX834_D	3	825	1322	314	38.061	23.752
BOX834	BOX834_D	4	864	824	211	24.421	25.607
BOX834	BOX834_D	5	839	511	117	13.945	22.896
BOX834	BOX834_D	6	869	338	77	8.861	22.781
BOX834	BOX834_D	7	858	234	42	4.895	17.949
BOX834	BOX834_D	8	836	181	29	3.469	16.022
BOX834	BOX834_D	9	828	153	22	2.657	14.379
BOX834	BOX834_D	10	815	121	13	1.595	10.744
BOX834	BOX834_D	11	792	117	13	1.641	11.111
BOX834	BOX834_D	12	783	102	11	1.405	10.784
BOX834	BOX834_D	13	751	87	13	1.731	14.943
BOX834	BOX834_D	14	709	75	13	1.834	17.333
BOX834	BOX834_D	15	679	62	6	0.884	9.677
BOX834	BOX834_D	16	664	48	4	0.602	8.333
BOX834	BOX834_D	17	621	35	4	0.644	11.429
BOX834	BOX834_D	18	605	34	3	0.496	8.824
BOX834	BOX834_D	19	565	27	3	0.531	11.111
BOX834	BOX834_D	20	535	19	2	0.374	10.526
BOX834	BOX834_D	21	512	18	2	0.391	11.111
BOX834	BOX834_D	22	483	17	1	0.207	5.882
BOX834	BOX834_D	23	458	14	0	0	0
BOX834	BOX834_D	24	435	9	0	0	0
BOX834	BOX834_D	25	416	8	0	0	0
BOX834	BOX834_D	30	311	2	0	0	0
BOX834	BOX834_D	35	228	0	0	0	NaN
BOX834	BOX834_D	40	187	0	0	0	NaN
BOX834	BOX834_D	45	158	0	0	0	NaN
BOX834	BOX834_D	50	146	0	0	0	NaN
BOX834	BOX834_E	1	892	892	249	27.915	27.915
BOX834	BOX834_E	2	822	1328	363	44.161	27.334
BOX834	BOX834_E	3	599	1022	214	35.726	20.939
BOX834	BOX834_E	4	413	617	101	24.455	16.37
BOX834	BOX834_E	5	332	354	49	14.759	13.842
BOX834	BOX834_E	6	310	189	21	6.774	11.111
BOX834	BOX834_E	7	296	134	12	4.054	8.955
BOX834	BOX834_E	8	280	99	8	2.857	8.081
BOX834	BOX834_E	9	275	71	6	2.182	8.451
BOX834	BOX834_E	10	276	54	4	1.449	7.407
BOX834	BOX834_E	11	266	46	2	0.752	4.348
BOX834	BOX834_E	12	261	42	2	0.766	4.762
BOX834	BOX834_E	13	255	34	1	0.392	2.941
BOX834	BOX834_E	14	254	28	1	0.394	3.571
BOX834	BOX834_E	15	245	26	1	0.408	3.846
BOX834	BOX834_E	16	234	25	1	0.427	4
BOX834	BOX834_E	17	226	25	1	0.442	4
BOX834	BOX834_E	18	219	24	2	0.913	8.333
BOX834	BOX834_E	19	211	21	2	0.948	9.524
BOX834	BOX834_E	20	208	21	2	0.962	9.524
BOX834	BOX834_E	21	205	20	1	0.488	5
BOX834	BOX834_E	22	199	17	1	0.503	5.882
BOX834	BOX834_E	23	192	16	1	0.521	6.25
BOX834	BOX834_E	24	185	16	1	0.541	6.25
BOX834	BOX834_E	25	180	14	1	0.556	7.143
BOX834	BOX834_E	30	153	13	1	0.654	7.692
BOX834	BOX834_E	35	127	9	1	0.787	11.111
BOX834	BOX834_E	40	115	5	1	0.87	20
BOX834	BOX834_E	45	103	3	0	0	0
BOX834	BOX834_E	50	98	2	0	0	0
BOX759	BOX759_A	1	929	902	479	51.561	53.104
BOX759	BOX759_A	2	1036	819	526	50.772	64.225
BOX759	BOX759_A	3	957	707	505	52.769	71.429
BOX759	BOX759_A	4	892	672	496	55.605	73.81
BOX759	BOX759_A	5	855	617	483	56.491	78.282
BOX759	BOX759_A	6	788	581	466	59.137	80.207
BOX759	BOX759_A	7	754	561	461	61.141	82.175
BOX759	BOX759_A	8	734	534	454	61.853	85.019
BOX759	BOX759_A	9	711	514	439	61.744	85.409
BOX759	BOX759_A	10	695	497	437	62.878	87.928
BOX759	BOX759_A	11	679	466	409	60.236	87.768
BOX759	BOX759_A	12	665	444	395	59.398	88.964
BOX759	BOX759_A	13	654	424	382	58.41	90.094
BOX759	BOX759_A	14	637	397	364	57.143	91.688
BOX759	BOX759_A	15	630	387	359	56.984	92.765
BOX759	BOX759_A	16	627	368	342	54.545	92.935
BOX759	BOX759_A	17	612	349	323	52.778	92.55
BOX759	BOX759_A	18	607	329	307	50.577	93.313
BOX759	BOX759_A	19	599	310	292	48.748	94.194
BOX759	BOX759_A	20	585	301	283	48.376	94.02
BOX759	BOX759_A	21	579	282	265	45.769	93.972
BOX759	BOX759_A	22	569	267	249	43.761	93.258
BOX759	BOX759_A	23	559	256	239	42.755	93.359
BOX759	BOX759_A	24	557	239	225	40.395	94.142
BOX759	BOX759_A	25	550	228	215	39.091	94.298
BOX759	BOX759_A	30	516	180	172	33.333	95.556
BOX759	BOX759_A	35	482	141	136	28.216	96.454
BOX759	BOX759_A	40	457	117	112	24.508	95.726
BOX759	BOX759_A	45	438	95	92	21.005	96.842
BOX759	BOX759_A	50	410	75	73	17.805	97.333
BOX759	BOX759_B	1	1042	1000	461	44.242	46.1
BOX759	BOX759_B	2	1235	1218	618	50.04	50.739
BOX759	BOX759_B	3	1293	1178	688	53.21	58.404
BOX759	BOX759_B	4	1265	1106	722	57.075	65.28
BOX759	BOX759_B	5	1229	1025	718	58.421	70.049
BOX759	BOX759_B	6	1195	980	732	61.255	74.694
BOX759	BOX759_B	7	1124	942	710	63.167	75.372
BOX759	BOX759_B	8	1090	887	705	64.679	79.481
BOX759	BOX759_B	9	1069	856	708	66.23	82.71
BOX759	BOX759_B	10	1062	810	688	64.783	84.938
BOX759	BOX759_B	11	1049	770	668	63.68	86.753
BOX759	BOX759_B	12	1037	737	648	62.488	87.924
BOX759	BOX759_B	13	1013	692	619	61.106	89.451
BOX759	BOX759_B	14	1005	674	615	61.194	91.246
BOX759	BOX759_B	15	1006	646	594	59.046	91.95
BOX759	BOX759_B	16	1000	612	570	57	93.137
BOX759	BOX759_B	17	980	584	553	56.429	94.692
BOX759	BOX759_B	18	969	552	528	54.489	95.652
BOX759	BOX759_B	19	950	534	513	54	96.067
BOX759	BOX759_B	20	939	516	498	53.035	96.512
BOX759	BOX759_B	21	926	496	479	51.728	96.573
BOX759	BOX759_B	22	917	474	458	49.945	96.624
BOX759	BOX759_B	23	898	443	429	47.773	96.84
BOX759	BOX759_B	24	889	414	402	45.219	97.101
BOX759	BOX759_B	25	881	402	391	44.381	97.264
BOX759	BOX759_B	30	821	326	319	38.855	97.853
BOX759	BOX759_B	35	764	254	252	32.984	99.213
BOX759	BOX759_B	40	719	206	205	28.512	99.515
BOX759	BOX759_B	45	671	174	173	25.782	99.425
BOX759	BOX759_B	50	620	136	135	21.774	99.265
BOX759	BOX759_C	1	432	427	152	35.185	35.597
BOX759	BOX759_C	2	574	559	236	41.115	42.218
BOX759	BOX759_C	3	616	568	266	43.182	46.831
BOX759	BOX759_C	4	578	541	261	45.156	48.244
BOX759	BOX759_C	5	517	493	253	48.936	51.318
BOX759	BOX759_C	6	496	442	242	48.79	54.751
BOX759	BOX759_C	7	464	400	247	53.233	61.75
BOX759	BOX759_C	8	435	377	237	54.483	62.865
BOX759	BOX759_C	9	418	338	216	51.675	63.905
BOX759	BOX759_C	10	400	309	199	49.75	64.401
BOX759	BOX759_C	11	387	281	185	47.804	65.836
BOX759	BOX759_C	12	361	243	170	47.091	69.959
BOX759	BOX759_C	13	344	227	160	46.512	70.485
BOX759	BOX759_C	14	330	211	148	44.848	70.142
BOX759	BOX759_C	15	306	203	141	46.078	69.458
BOX759	BOX759_C	16	290	190	133	45.862	70
BOX759	BOX759_C	17	272	174	119	43.75	68.391
BOX759	BOX759_C	18	258	163	111	43.023	68.098
BOX759	BOX759_C	19	246	158	109	44.309	68.987
BOX759	BOX759_C	20	234	148	104	44.444	70.27
BOX759	BOX759_C	21	220	137	99	45	72.263
BOX759	BOX759_C	22	203	130	97	47.783	74.615
BOX759	BOX759_C	23	196	127	94	47.959	74.016
BOX759	BOX759_C	24	184	117	91	49.457	77.778
BOX759	BOX759_C	25	179	109	86	48.045	78.899
BOX759	BOX759_C	30	146	85	65	44.521	76.471
BOX759	BOX759_C	35	120	59	46	38.333	77.966
BOX759	BOX759_C	40	103	52	44	42.718	84.615
BOX759	BOX759_C	45	85	45	38	44.706	84.444
BOX759	BOX759_C	50	67	42	35	52.239	83.333
BOX759	BOX759_D	1	437	450	206	47.14	45.778
BOX759	BOX759_D	2	523	523	266	50.86	50.86
BOX759	BOX759_D	3	480	428	234	48.75	54.673
BOX759	BOX759_D	4	469	372	231	49.254	62.097
BOX759	BOX759_D	5	412	338	233	56.553	68.935
BOX759	BOX759_D	6	368	308	219	59.511	71.104
BOX759	BOX759_D	7	329	297	205	62.31	69.024
BOX759	BOX759_D	8	306	295	207	67.647	70.169
BOX759	BOX759_D	9	297	280	201	67.677	71.786
BOX759	BOX759_D	10	284	268	198	69.718	73.881
BOX759	BOX759_D	11	277	253	193	69.675	76.285
BOX759	BOX759_D	12	277	246	194	70.036	78.862
BOX759	BOX759_D	13	274	248	200	72.993	80.645
BOX759	BOX759_D	14	268	238	197	73.507	82.773
BOX759	BOX759_D	15	259	230	187	72.201	81.304
BOX759	BOX759_D	16	250	225	185	74	82.222
BOX759	BOX759_D	17	249	221	181	72.691	81.9
BOX759	BOX759_D	18	245	214	180	73.469	84.112
BOX759	BOX759_D	19	235	211	178	75.745	84.36
BOX759	BOX759_D	20	233	202	173	74.249	85.644
BOX759	BOX759_D	21	224	195	169	75.446	86.667
BOX759	BOX759_D	22	221	188	167	75.566	88.83
BOX759	BOX759_D	23	216	180	160	74.074	88.889
BOX759	BOX759_D	24	209	168	151	72.249	89.881
BOX759	BOX759_D	25	209	160	146	69.856	91.25
BOX759	BOX759_D	30	197	136	125	63.452	91.912
BOX759	BOX759_D	35	185	113	105	56.757	92.92
BOX759	BOX759_D	40	159	105	97	61.006	92.381
BOX759	BOX759_D	45	135	88	82	60.741	93.182
BOX759	BOX759_D	50	117	81	74	63.248	91.358
BOX759	BOX759_E	1	68	83	30	44.118	36.145
BOX759	BOX759_E	2	91	103	44	48.352	42.718
BOX759	BOX759_E	3	105	134	60	57.143	44.776
BOX759	BOX759_E	4	116	143	76	65.517	53.147
BOX759	BOX759_E	5	121	134	78	64.463	58.209
BOX759	BOX759_E	6	131	122	79	60.305	64.754
BOX759	BOX759_E	7	131	112	69	52.672	61.607
BOX759	BOX759_E	8	131	94	66	50.382	70.213
BOX759	BOX759_E	9	129	82	61	47.287	74.39
BOX759	BOX759_E	10	125	68	54	43.2	79.412
BOX759	BOX759_E	11	121	63	49	40.496	77.778
BOX759	BOX759_E	12	105	56	45	42.857	80.357
BOX759	BOX759_E	13	97	53	41	42.268	77.358
BOX759	BOX759_E	14	88	47	39	44.318	82.979
BOX759	BOX759_E	15	84	43	37	44.048	86.047
BOX759	BOX759_E	16	79	42	37	46.835	88.095
BOX759	BOX759_E	17	76	38	34	44.737	89.474
BOX759	BOX759_E	18	74	36	33	44.595	91.667
BOX759	BOX759_E	19	74	36	30	40.541	83.333
BOX759	BOX759_E	20	68	33	28	41.176	84.848
BOX759	BOX759_E	21	65	33	27	41.538	81.818
BOX759	BOX759_E	22	62	33	28	45.161	84.848
BOX759	BOX759_E	23	58	31	26	44.828	83.871
BOX759	BOX759_E	24	57	29	26	45.614	89.655
BOX759	BOX759_E	25	55	27	23	41.818	85.185
BOX759	BOX759_E	30	48	20	19	39.583	95
BOX759	BOX759_E	35	44	15	15	34.091	100
BOX759	BOX759_E	40	40	13	13	32.5	100
BOX759	BOX759_E	45	35	13	13	37.143	100
BOX759	BOX759_E	50	32	12	12	37.5	100

## Sheet: Figure S2B
genotype	animal_num	threshold	ch1_spots	ch2_spots	coloc_spots	ch1_percent	ch2_percent
BOX831	BOX831_A	1	2418	2846	1104	45.658	38.791
BOX831	BOX831_A	2	2401	1706	687	28.613	40.27
BOX831	BOX831_A	3	1775	1006	363	20.451	36.083
BOX831	BOX831_A	4	1232	768	299	24.269	38.932
BOX831	BOX831_A	5	993	696	289	29.104	41.523
BOX831	BOX831_A	6	890	666	298	33.483	44.745
BOX831	BOX831_A	7	841	654	318	37.812	48.624
BOX831	BOX831_A	8	821	646	331	40.317	51.238
BOX831	BOX831_A	9	780	630	338	43.333	53.651
BOX831	BOX831_A	10	766	630	347	45.3	55.079
BOX831	BOX831_A	11	743	623	353	47.51	56.661
BOX831	BOX831_A	12	708	621	352	49.718	56.683
BOX831	BOX831_A	13	702	623	364	51.852	58.427
BOX831	BOX831_A	14	687	617	370	53.857	59.968
BOX831	BOX831_A	15	673	613	370	54.978	60.359
BOX831	BOX831_A	16	667	611	370	55.472	60.556
BOX831	BOX831_A	17	645	604	366	56.744	60.596
BOX831	BOX831_A	18	634	602	362	57.098	60.133
BOX831	BOX831_A	19	606	606	362	59.736	59.736
BOX831	BOX831_A	20	603	591	365	60.531	61.76
BOX831	BOX831_A	21	593	583	360	60.708	61.75
BOX831	BOX831_A	22	586	581	356	60.751	61.274
BOX831	BOX831_A	23	565	577	346	61.239	59.965
BOX831	BOX831_A	24	558	567	339	60.753	59.788
BOX831	BOX831_A	25	550	550	331	60.182	60.182
BOX831	BOX831_A	30	505	532	323	63.96	60.714
BOX831	BOX831_A	35	451	490	285	63.193	58.163
BOX831	BOX831_A	40	396	456	253	63.889	55.482
BOX831	BOX831_A	45	363	438	234	64.463	53.425
BOX831	BOX831_A	50	336	420	224	66.667	53.333
BOX831	BOX831_B	1	2062	2940	1030	49.952	35.034
BOX831	BOX831_B	2	2051	1596	614	29.937	38.471
BOX831	BOX831_B	3	1597	792	306	19.161	38.636
BOX831	BOX831_B	4	1273	530	218	17.125	41.132
BOX831	BOX831_B	5	1052	434	187	17.776	43.088
BOX831	BOX831_B	6	938	372	165	17.591	44.355
BOX831	BOX831_B	7	852	323	147	17.254	45.511
BOX831	BOX831_B	8	816	299	148	18.137	49.498
BOX831	BOX831_B	9	796	291	148	18.593	50.859
BOX831	BOX831_B	10	775	267	136	17.548	50.936
BOX831	BOX831_B	11	771	259	135	17.51	52.124
BOX831	BOX831_B	12	757	259	137	18.098	52.896
BOX831	BOX831_B	13	730	251	130	17.808	51.793
BOX831	BOX831_B	14	718	246	126	17.549	51.22
BOX831	BOX831_B	15	702	246	128	18.234	52.033
BOX831	BOX831_B	16	695	245	129	18.561	52.653
BOX831	BOX831_B	17	679	247	128	18.851	51.822
BOX831	BOX831_B	18	672	237	120	17.857	50.633
BOX831	BOX831_B	19	671	235	121	18.033	51.489
BOX831	BOX831_B	20	662	231	115	17.372	49.784
BOX831	BOX831_B	21	651	228	114	17.512	50
BOX831	BOX831_B	22	645	225	113	17.519	50.222
BOX831	BOX831_B	23	641	233	113	17.629	48.498
BOX831	BOX831_B	24	628	237	113	17.994	47.679
BOX831	BOX831_B	25	618	235	111	17.961	47.234
BOX831	BOX831_B	30	552	244	105	19.022	43.033
BOX831	BOX831_B	35	517	225	90	17.408	40
BOX831	BOX831_B	40	485	223	79	16.289	35.426
BOX831	BOX831_B	45	446	225	76	17.04	33.778
BOX831	BOX831_B	50	413	218	74	17.918	33.945
BOX831	BOX831_C	1	3269	3696	1700	52.004	45.996
BOX831	BOX831_C	2	2998	1646	804	26.818	48.846
BOX831	BOX831_C	3	1779	685	332	18.662	48.467
BOX831	BOX831_C	4	1043	483	250	23.969	51.76
BOX831	BOX831_C	5	747	412	227	30.388	55.097
BOX831	BOX831_C	6	613	372	213	34.747	57.258
BOX831	BOX831_C	7	577	350	226	39.168	64.571
BOX831	BOX831_C	8	536	329	224	41.791	68.085
BOX831	BOX831_C	9	517	316	218	42.166	68.987
BOX831	BOX831_C	10	495	302	215	43.434	71.192
BOX831	BOX831_C	11	481	292	217	45.114	74.315
BOX831	BOX831_C	12	469	292	215	45.842	73.63
BOX831	BOX831_C	13	453	290	213	47.02	73.448
BOX831	BOX831_C	14	447	289	208	46.532	71.972
BOX831	BOX831_C	15	430	277	201	46.744	72.563
BOX831	BOX831_C	16	417	268	185	44.365	69.03
BOX831	BOX831_C	17	404	263	180	44.554	68.441
BOX831	BOX831_C	18	393	255	169	43.003	66.275
BOX831	BOX831_C	19	393	240	169	43.003	70.417
BOX831	BOX831_C	20	388	241	168	43.299	69.71
BOX831	BOX831_C	21	371	229	162	43.666	70.742
BOX831	BOX831_C	22	368	223	160	43.478	71.749
BOX831	BOX831_C	23	363	213	156	42.975	73.239
BOX831	BOX831_C	24	356	202	150	42.135	74.257
BOX831	BOX831_C	25	348	199	148	42.529	74.372
BOX831	BOX831_C	30	315	168	121	38.413	72.024
BOX831	BOX831_C	35	264	138	100	37.879	72.464
BOX831	BOX831_C	40	248	128	91	36.694	71.094
BOX831	BOX831_C	45	226	130	86	38.053	66.154
BOX831	BOX831_C	50	207	124	79	38.164	63.71
BOX831	BOX831_D	1	3549	4455	1873	52.775	42.043
BOX831	BOX831_D	2	3537	2186	975	27.566	44.602
BOX831	BOX831_D	3	2383	833	383	16.072	45.978
BOX831	BOX831_D	4	1543	552	279	18.082	50.543
BOX831	BOX831_D	5	1106	472	258	23.327	54.661
BOX831	BOX831_D	6	885	434	239	27.006	55.069
BOX831	BOX831_D	7	765	399	219	28.627	54.887
BOX831	BOX831_D	8	688	360	207	30.087	57.5
BOX831	BOX831_D	9	652	348	199	30.521	57.184
BOX831	BOX831_D	10	621	334	198	31.884	59.281
BOX831	BOX831_D	11	598	310	193	32.274	62.258
BOX831	BOX831_D	12	583	300	191	32.762	63.667
BOX831	BOX831_D	13	564	279	180	31.915	64.516
BOX831	BOX831_D	14	547	268	178	32.541	66.418
BOX831	BOX831_D	15	534	266	176	32.959	66.165
BOX831	BOX831_D	16	517	259	172	33.269	66.409
BOX831	BOX831_D	17	502	251	175	34.861	69.721
BOX831	BOX831_D	18	500	250	171	34.2	68.4
BOX831	BOX831_D	19	504	245	172	34.127	70.204
BOX831	BOX831_D	20	497	236	166	33.4	70.339
BOX831	BOX831_D	21	481	228	161	33.472	70.614
BOX831	BOX831_D	22	469	222	152	32.409	68.468
BOX831	BOX831_D	23	455	217	150	32.967	69.124
BOX831	BOX831_D	24	445	208	147	33.034	70.673
BOX831	BOX831_D	25	439	195	135	30.752	69.231
BOX831	BOX831_D	30	398	180	129	32.412	71.667
BOX831	BOX831_D	35	370	150	117	31.622	78
BOX831	BOX831_D	40	338	141	107	31.657	75.887
BOX831	BOX831_D	45	315	130	97	30.794	74.615
BOX831	BOX831_D	50	277	129	99	35.74	76.744
BOX831	BOX831_E	1	2616	3137	1435	54.855	45.744
BOX831	BOX831_E	2	2241	1546	634	28.291	41.009
BOX831	BOX831_E	3	1221	585	254	20.803	43.419
BOX831	BOX831_E	4	735	373	194	26.395	52.011
BOX831	BOX831_E	5	547	302	176	32.176	58.278
BOX831	BOX831_E	6	466	275	169	36.266	61.455
BOX831	BOX831_E	7	418	252	164	39.234	65.079
BOX831	BOX831_E	8	381	254	169	44.357	66.535
BOX831	BOX831_E	9	374	242	167	44.652	69.008
BOX831	BOX831_E	10	356	231	160	44.944	69.264
BOX831	BOX831_E	11	353	228	167	47.309	73.246
BOX831	BOX831_E	12	335	216	165	49.254	76.389
BOX831	BOX831_E	13	317	209	159	50.158	76.077
BOX831	BOX831_E	14	314	206	158	50.318	76.699
BOX831	BOX831_E	15	306	202	159	51.961	78.713
BOX831	BOX831_E	16	297	203	158	53.199	77.833
BOX831	BOX831_E	17	281	205	153	54.448	74.634
BOX831	BOX831_E	18	275	198	151	54.909	76.263
BOX831	BOX831_E	19	276	188	150	54.348	79.787
BOX831	BOX831_E	20	267	187	148	55.431	79.144
BOX831	BOX831_E	21	262	185	142	54.198	76.757
BOX831	BOX831_E	22	250	182	138	55.2	75.824
BOX831	BOX831_E	23	245	181	138	56.327	76.243
BOX831	BOX831_E	24	243	180	133	54.733	73.889
BOX831	BOX831_E	25	238	177	129	54.202	72.881
BOX831	BOX831_E	30	215	164	123	57.209	75
BOX831	BOX831_E	35	197	159	112	56.853	70.44
BOX831	BOX831_E	40	183	158	109	59.563	68.987
BOX831	BOX831_E	45	176	156	104	59.091	66.667
BOX831	BOX831_E	50	172	147	101	58.721	68.707
BOX831	BOX831_F	1	1529	2335	813	53.172	34.818
BOX831	BOX831_F	2	1826	1378	561	30.723	40.711
BOX831	BOX831_F	3	1655	672	280	16.918	41.667
BOX831	BOX831_F	4	1271	420	193	15.185	45.952
BOX831	BOX831_F	5	946	344	176	18.605	51.163
BOX831	BOX831_F	6	766	310	165	21.54	53.226
BOX831	BOX831_F	7	654	279	156	23.853	55.914
BOX831	BOX831_F	8	573	256	152	26.527	59.375
BOX831	BOX831_F	9	528	240	152	28.788	63.333
BOX831	BOX831_F	10	500	236	151	30.2	63.983
BOX831	BOX831_F	11	479	217	145	30.271	66.82
BOX831	BOX831_F	12	465	208	150	32.258	72.115
BOX831	BOX831_F	13	447	203	146	32.662	71.921
BOX831	BOX831_F	14	439	199	143	32.574	71.859
BOX831	BOX831_F	15	430	191	141	32.791	73.822
BOX831	BOX831_F	16	424	195	139	32.783	71.282
BOX831	BOX831_F	17	412	192	139	33.738	72.396
BOX831	BOX831_F	18	396	187	140	35.354	74.866
BOX831	BOX831_F	19	395	183	136	34.43	74.317
BOX831	BOX831_F	20	384	184	135	35.156	73.37
BOX831	BOX831_F	21	379	177	132	34.828	74.576
BOX831	BOX831_F	22	371	176	131	35.31	74.432
BOX831	BOX831_F	23	367	174	129	35.15	74.138
BOX831	BOX831_F	24	361	170	127	35.18	74.706
BOX831	BOX831_F	25	347	167	124	35.735	74.251
BOX831	BOX831_F	30	333	157	115	34.535	73.248
BOX831	BOX831_F	35	312	152	109	34.936	71.711
BOX831	BOX831_F	40	305	152	104	34.098	68.421
BOX831	BOX831_F	45	284	142	99	34.859	69.718
BOX831	BOX831_F	50	265	142	92	34.717	64.789
BOX836	BOX836_A	1	1082	1309	498	46.026	38.044
BOX836	BOX836_A	2	718	579	154	21.448	26.598
BOX836	BOX836_A	3	344	184	25	7.267	13.587
BOX836	BOX836_A	4	254	76	7	2.756	9.211
BOX836	BOX836_A	5	255	58	3	1.176	5.172
BOX836	BOX836_A	6	215	48	3	1.395	6.25
BOX836	BOX836_A	7	189	43	3	1.587	6.977
BOX836	BOX836_A	8	157	42	1	0.637	2.381
BOX836	BOX836_A	9	137	38	1	0.73	2.632
BOX836	BOX836_A	10	121	37	2	1.653	5.405
BOX836	BOX836_A	11	112	35	3	2.679	8.571
BOX836	BOX836_A	12	107	31	3	2.804	9.677
BOX836	BOX836_A	13	102	23	3	2.941	13.043
BOX836	BOX836_A	14	100	21	3	3	14.286
BOX836	BOX836_A	15	97	16	2	2.062	12.5
BOX836	BOX836_A	16	92	15	1	1.087	6.667
BOX836	BOX836_A	17	90	14	2	2.222	14.286
BOX836	BOX836_A	18	88	13	2	2.273	15.385
BOX836	BOX836_A	19	85	12	2	2.353	16.667
BOX836	BOX836_A	20	82	13	2	2.439	15.385
BOX836	BOX836_A	21	79	13	2	2.532	15.385
BOX836	BOX836_A	22	79	12	2	2.532	16.667
BOX836	BOX836_A	23	76	12	1	1.316	8.333
BOX836	BOX836_A	24	71	13	1	1.408	7.692
BOX836	BOX836_A	25	69	13	1	1.449	7.692
BOX836	BOX836_A	30	53	8	0	0	0
BOX836	BOX836_A	35	43	8	0	0	0
BOX836	BOX836_A	40	38	7	0	0	0
BOX836	BOX836_A	45	31	6	0	0	0
BOX836	BOX836_A	50	24	5	0	0	0
BOX836	BOX836_B	1	1341	1491	659	49.142	44.199
BOX836	BOX836_B	2	659	492	112	16.995	22.764
BOX836	BOX836_B	3	254	123	18	7.087	14.634
BOX836	BOX836_B	4	154	68	9	5.844	13.235
BOX836	BOX836_B	5	115	65	4	3.478	6.154
BOX836	BOX836_B	6	109	59	4	3.67	6.78
BOX836	BOX836_B	7	112	57	2	1.786	3.509
BOX836	BOX836_B	8	112	49	2	1.786	4.082
BOX836	BOX836_B	9	108	42	1	0.926	2.381
BOX836	BOX836_B	10	106	38	0	0	0
BOX836	BOX836_B	11	103	35	0	0	0
BOX836	BOX836_B	12	102	32	0	0	0
BOX836	BOX836_B	13	103	25	0	0	0
BOX836	BOX836_B	14	103	20	0	0	0
BOX836	BOX836_B	15	105	22	0	0	0
BOX836	BOX836_B	16	104	20	0	0	0
BOX836	BOX836_B	17	101	19	1	0.99	5.263
BOX836	BOX836_B	18	97	14	1	1.031	7.143
BOX836	BOX836_B	19	92	14	1	1.087	7.143
BOX836	BOX836_B	20	90	11	1	1.111	9.091
BOX836	BOX836_B	21	87	10	1	1.149	10
BOX836	BOX836_B	22	86	9	1	1.163	11.111
BOX836	BOX836_B	23	87	9	1	1.149	11.111
BOX836	BOX836_B	24	86	9	1	1.163	11.111
BOX836	BOX836_B	25	83	7	1	1.205	14.286
BOX836	BOX836_B	30	76	8	1	1.316	12.5
BOX836	BOX836_B	35	70	8	0	0	0
BOX836	BOX836_B	40	69	14	0	0	0
BOX836	BOX836_B	45	66	16	0	0	0
BOX836	BOX836_B	50	63	14	0	0	0
BOX836	BOX836_C	1	4099	5500	1750	42.693	31.818
BOX836	BOX836_C	2	3454	2637	797	23.075	30.224
BOX836	BOX836_C	3	2113	890	165	7.809	18.539
BOX836	BOX836_C	4	1517	489	57	3.757	11.656
BOX836	BOX836_C	5	1318	383	35	2.656	9.138
BOX836	BOX836_C	6	1222	332	29	2.373	8.735
BOX836	BOX836_C	7	1170	303	26	2.222	8.581
BOX836	BOX836_C	8	1116	293	24	2.151	8.191
BOX836	BOX836_C	9	1039	265	22	2.117	8.302
BOX836	BOX836_C	10	947	258	24	2.534	9.302
BOX836	BOX836_C	11	893	257	20	2.24	7.782
BOX836	BOX836_C	12	863	240	15	1.738	6.25
BOX836	BOX836_C	13	813	232	13	1.599	5.603
BOX836	BOX836_C	14	783	219	15	1.916	6.849
BOX836	BOX836_C	15	765	210	16	2.092	7.619
BOX836	BOX836_C	16	749	194	15	2.003	7.732
BOX836	BOX836_C	17	744	191	17	2.285	8.901
BOX836	BOX836_C	18	739	183	18	2.436	9.836
BOX836	BOX836_C	19	733	177	17	2.319	9.605
BOX836	BOX836_C	20	727	166	17	2.338	10.241
BOX836	BOX836_C	21	717	157	16	2.232	10.191
BOX836	BOX836_C	22	701	146	13	1.854	8.904
BOX836	BOX836_C	23	697	142	14	2.009	9.859
BOX836	BOX836_C	24	683	132	14	2.05	10.606
BOX836	BOX836_C	25	673	123	12	1.783	9.756
BOX836	BOX836_C	30	633	101	10	1.58	9.901
BOX836	BOX836_C	35	592	94	6	1.014	6.383
BOX836	BOX836_C	40	569	85	6	1.054	7.059
BOX836	BOX836_C	45	535	76	5	0.935	6.579
BOX836	BOX836_C	50	500	72	5	1	6.944
BOX836	BOX836_D	1	2230	3122	806	36.143	25.817
BOX836	BOX836_D	2	1941	2013	496	25.554	24.64
BOX836	BOX836_D	3	1420	927	181	12.746	19.525
BOX836	BOX836_D	4	1088	529	96	8.824	18.147
BOX836	BOX836_D	5	930	394	68	7.312	17.259
BOX836	BOX836_D	6	880	330	57	6.477	17.273
BOX836	BOX836_D	7	858	295	45	5.245	15.254
BOX836	BOX836_D	8	829	274	41	4.946	14.964
BOX836	BOX836_D	9	826	253	39	4.722	15.415
BOX836	BOX836_D	10	810	232	35	4.321	15.086
BOX836	BOX836_D	11	794	212	36	4.534	16.981
BOX836	BOX836_D	12	797	191	30	3.764	15.707
BOX836	BOX836_D	13	801	176	26	3.246	14.773
BOX836	BOX836_D	14	796	162	20	2.513	12.346
BOX836	BOX836_D	15	795	152	17	2.138	11.184
BOX836	BOX836_D	16	792	142	17	2.146	11.972
BOX836	BOX836_D	17	796	134	16	2.01	11.94
BOX836	BOX836_D	18	807	121	15	1.859	12.397
BOX836	BOX836_D	19	798	119	13	1.629	10.924
BOX836	BOX836_D	20	795	111	13	1.635	11.712
BOX836	BOX836_D	21	793	107	12	1.513	11.215
BOX836	BOX836_D	22	785	102	13	1.656	12.745
BOX836	BOX836_D	23	782	100	12	1.535	12
BOX836	BOX836_D	24	771	99	11	1.427	11.111
BOX836	BOX836_D	25	763	89	11	1.442	12.36
BOX836	BOX836_D	30	725	90	12	1.655	13.333
BOX836	BOX836_D	35	692	87	11	1.59	12.644
BOX836	BOX836_D	40	679	78	11	1.62	14.103
BOX836	BOX836_D	45	661	71	9	1.362	12.676
BOX836	BOX836_D	50	641	68	10	1.56	14.706

## Sheet: Figure S2C
genotype	animal_num	threshold	ch1_spots	ch2_spots	coloc_spots	ch1_percent	ch2_percent
BOX787	BOX787_A	1	1138	1294	446	39.192	34.467
BOX787	BOX787_A	2	1013	1500	456	45.015	30.4
BOX787	BOX787_A	3	652	945	218	33.436	23.069
BOX787	BOX787_A	4	440	495	104	23.636	21.01
BOX787	BOX787_A	5	324	262	38	11.728	14.504
BOX787	BOX787_A	6	264	153	19	7.197	12.418
BOX787	BOX787_A	7	248	102	10	4.032	9.804
BOX787	BOX787_A	8	235	78	9	3.83	11.538
BOX787	BOX787_A	9	221	60	6	2.715	10
BOX787	BOX787_A	10	217	47	5	2.304	10.638
BOX787	BOX787_A	11	209	34	3	1.435	8.824
BOX787	BOX787_A	12	201	29	1	0.498	3.448
BOX787	BOX787_A	13	196	19	0	0	0
BOX787	BOX787_A	14	198	12	0	0	0
BOX787	BOX787_A	15	189	10	0	0	0
BOX787	BOX787_A	16	185	9	0	0	0
BOX787	BOX787_A	17	178	9	1	0.562	11.111
BOX787	BOX787_A	18	177	8	1	0.565	12.5
BOX787	BOX787_A	19	173	5	1	0.578	20
BOX787	BOX787_A	20	170	5	1	0.588	20
BOX787	BOX787_A	21	164	6	1	0.61	16.667
BOX787	BOX787_A	22	164	5	1	0.61	20
BOX787	BOX787_A	23	159	4	1	0.629	25
BOX787	BOX787_A	24	155	4	1	0.645	25
BOX787	BOX787_A	25	150	3	1	0.667	33.333
BOX787	BOX787_A	30	138	2	0	0	0
BOX787	BOX787_A	35	123	2	0	0	0
BOX787	BOX787_A	40	108	1	0	0	0
BOX787	BOX787_A	45	102	0	0	0	NaN
BOX787	BOX787_A	50	91	0	0	0	NaN
BOX787	BOX787_B	1	750	1080	279	37.2	25.833
BOX787	BOX787_B	2	757	1052	257	33.95	24.43
BOX787	BOX787_B	3	694	657	163	23.487	24.81
BOX787	BOX787_B	4	596	391	77	12.919	19.693
BOX787	BOX787_B	5	536	232	56	10.448	24.138
BOX787	BOX787_B	6	483	185	41	8.489	22.162
BOX787	BOX787_B	7	448	165	32	7.143	19.394
BOX787	BOX787_B	8	412	147	23	5.583	15.646
BOX787	BOX787_B	9	390	132	23	5.897	17.424
BOX787	BOX787_B	10	368	120	22	5.978	18.333
BOX787	BOX787_B	11	353	116	18	5.099	15.517
BOX787	BOX787_B	12	336	102	15	4.464	14.706
BOX787	BOX787_B	13	328	95	14	4.268	14.737
BOX787	BOX787_B	14	315	88	9	2.857	10.227
BOX787	BOX787_B	15	307	83	9	2.932	10.843
BOX787	BOX787_B	16	299	79	8	2.676	10.127
BOX787	BOX787_B	17	289	73	7	2.422	9.589
BOX787	BOX787_B	18	281	69	9	3.203	13.043
BOX787	BOX787_B	19	274	73	7	2.555	9.589
BOX787	BOX787_B	20	266	64	5	1.88	7.812
BOX787	BOX787_B	21	259	60	5	1.931	8.333
BOX787	BOX787_B	22	259	57	4	1.544	7.018
BOX787	BOX787_B	23	255	50	2	0.784	4
BOX787	BOX787_B	24	256	43	2	0.781	4.651
BOX787	BOX787_B	25	251	43	2	0.797	4.651
BOX787	BOX787_B	30	239	32	1	0.418	3.125
BOX787	BOX787_B	35	236	21	1	0.424	4.762
BOX787	BOX787_B	40	226	9	0	0	0
BOX787	BOX787_B	45	225	6	0	0	0
BOX787	BOX787_B	50	223	4	0	0	0
BOX787	BOX787_C	1	1056	1358	379	35.89	27.909
BOX787	BOX787_C	2	980	1454	389	39.694	26.754
BOX787	BOX787_C	3	706	851	174	24.646	20.447
BOX787	BOX787_C	4	509	423	68	13.36	16.076
BOX787	BOX787_C	5	421	221	25	5.938	11.312
BOX787	BOX787_C	6	394	132	18	4.569	13.636
BOX787	BOX787_C	7	383	99	13	3.394	13.131
BOX787	BOX787_C	8	360	88	12	3.333	13.636
BOX787	BOX787_C	9	348	77	10	2.874	12.987
BOX787	BOX787_C	10	333	69	8	2.402	11.594
BOX787	BOX787_C	11	322	67	8	2.484	11.94
BOX787	BOX787_C	12	319	69	9	2.821	13.043
BOX787	BOX787_C	13	313	70	10	3.195	14.286
BOX787	BOX787_C	14	305	63	9	2.951	14.286
BOX787	BOX787_C	15	302	55	6	1.987	10.909
BOX787	BOX787_C	16	301	49	4	1.329	8.163
BOX787	BOX787_C	17	297	46	3	1.01	6.522
BOX787	BOX787_C	18	298	45	2	0.671	4.444
BOX787	BOX787_C	19	299	45	3	1.003	6.667
BOX787	BOX787_C	20	296	40	2	0.676	5
BOX787	BOX787_C	21	292	34	1	0.342	2.941
BOX787	BOX787_C	22	291	32	1	0.344	3.125
BOX787	BOX787_C	23	290	31	1	0.345	3.226
BOX787	BOX787_C	24	285	27	0	0	0
BOX787	BOX787_C	25	282	24	0	0	0
BOX787	BOX787_C	30	267	16	0	0	0
BOX787	BOX787_C	35	258	17	1	0.388	5.882
BOX787	BOX787_C	40	246	15	1	0.407	6.667
BOX787	BOX787_C	45	235	10	0	0	0
BOX787	BOX787_C	50	232	5	0	0	0
BOX787	BOX787_D	1	2126	2782	844	39.699	30.338
BOX787	BOX787_D	2	2047	2242	645	31.51	28.769
BOX787	BOX787_D	3	1502	1055	230	15.313	21.801
BOX787	BOX787_D	4	1140	498	90	7.895	18.072
BOX787	BOX787_D	5	902	298	50	5.543	16.779
BOX787	BOX787_D	6	754	222	30	3.979	13.514
BOX787	BOX787_D	7	668	165	14	2.096	8.485
BOX787	BOX787_D	8	622	137	13	2.09	9.489
BOX787	BOX787_D	9	569	132	16	2.812	12.121
BOX787	BOX787_D	10	544	123	10	1.838	8.13
BOX787	BOX787_D	11	522	107	10	1.916	9.346
BOX787	BOX787_D	12	509	97	8	1.572	8.247
BOX787	BOX787_D	13	499	83	7	1.403	8.434
BOX787	BOX787_D	14	491	70	7	1.426	10
BOX787	BOX787_D	15	488	62	6	1.23	9.677
BOX787	BOX787_D	16	489	61	6	1.227	9.836
BOX787	BOX787_D	17	484	56	5	1.033	8.929
BOX787	BOX787_D	18	479	56	6	1.253	10.714
BOX787	BOX787_D	19	471	45	5	1.062	11.111
BOX787	BOX787_D	20	468	44	4	0.855	9.091
BOX787	BOX787_D	21	469	44	4	0.853	9.091
BOX787	BOX787_D	22	468	37	5	1.068	13.514
BOX787	BOX787_D	23	468	37	4	0.855	10.811
BOX787	BOX787_D	24	468	33	2	0.427	6.061
BOX787	BOX787_D	25	461	25	1	0.217	4
BOX787	BOX787_D	30	449	15	0	0	0
BOX787	BOX787_D	35	433	16	2	0.462	12.5
BOX787	BOX787_D	40	417	11	0	0	0
BOX787	BOX787_D	45	410	11	1	0.244	9.091
BOX787	BOX787_D	50	405	7	0	0	0
BOX763	BOX763_A	1	1152	1650	462	40.104	28
BOX763	BOX763_A	2	1322	2048	605	45.764	29.541
BOX763	BOX763_A	3	1058	1309	340	32.136	25.974
BOX763	BOX763_A	4	814	616	147	18.059	23.864
BOX763	BOX763_A	5	661	264	53	8.018	20.076
BOX763	BOX763_A	6	553	128	17	3.074	13.281
BOX763	BOX763_A	7	494	70	5	1.012	7.143
BOX763	BOX763_A	8	467	51	5	1.071	9.804
BOX763	BOX763_A	9	434	37	4	0.922	10.811
BOX763	BOX763_A	10	417	33	5	1.199	15.152
BOX763	BOX763_A	11	389	27	2	0.514	7.407
BOX763	BOX763_A	12	364	20	1	0.275	5
BOX763	BOX763_A	13	348	16	2	0.575	12.5
BOX763	BOX763_A	14	330	15	2	0.606	13.333
BOX763	BOX763_A	15	309	15	2	0.647	13.333
BOX763	BOX763_A	16	294	12	1	0.34	8.333
BOX763	BOX763_A	17	280	10	1	0.357	10
BOX763	BOX763_A	18	267	7	0	0	0
BOX763	BOX763_A	19	253	6	0	0	0
BOX763	BOX763_A	20	240	6	0	0	0
BOX763	BOX763_A	21	233	6	0	0	0
BOX763	BOX763_A	22	221	6	0	0	0
BOX763	BOX763_A	23	211	6	0	0	0
BOX763	BOX763_A	24	202	6	0	0	0
BOX763	BOX763_A	25	189	4	0	0	0
BOX763	BOX763_A	30	137	2	0	0	0
BOX763	BOX763_A	35	115	1	0	0	0
BOX763	BOX763_A	40	91	1	0	0	0
BOX763	BOX763_A	45	76	1	0	0	0
BOX763	BOX763_A	50	57	1	0	0	0
BOX763	BOX763_B	1	324	552	138	42.593	25
BOX763	BOX763_B	2	325	574	140	43.077	24.39
BOX763	BOX763_B	3	322	372	89	27.64	23.925
BOX763	BOX763_B	4	322	189	51	15.839	26.984
BOX763	BOX763_B	5	337	112	33	9.792	29.464
BOX763	BOX763_B	6	336	75	25	7.44	33.333
BOX763	BOX763_B	7	327	54	20	6.116	37.037
BOX763	BOX763_B	8	316	55	18	5.696	32.727
BOX763	BOX763_B	9	304	45	12	3.947	26.667
BOX763	BOX763_B	10	294	40	9	3.061	22.5
BOX763	BOX763_B	11	286	35	10	3.497	28.571
BOX763	BOX763_B	12	266	34	10	3.759	29.412
BOX763	BOX763_B	13	261	35	11	4.215	31.429
BOX763	BOX763_B	14	250	36	11	4.4	30.556
BOX763	BOX763_B	15	231	32	9	3.896	28.125
BOX763	BOX763_B	16	224	28	8	3.571	28.571
BOX763	BOX763_B	17	216	24	6	2.778	25
BOX763	BOX763_B	18	204	20	6	2.941	30
BOX763	BOX763_B	19	194	20	5	2.577	25
BOX763	BOX763_B	20	189	17	3	1.587	17.647
BOX763	BOX763_B	21	181	15	4	2.21	26.667
BOX763	BOX763_B	22	173	14	2	1.156	14.286
BOX763	BOX763_B	23	163	13	2	1.227	15.385
BOX763	BOX763_B	24	155	13	2	1.29	15.385
BOX763	BOX763_B	25	149	13	2	1.342	15.385
BOX763	BOX763_B	30	105	11	1	0.952	9.091
BOX763	BOX763_B	35	78	9	0	0	0
BOX763	BOX763_B	40	62	8	0	0	0
BOX763	BOX763_B	45	51	8	0	0	0
BOX763	BOX763_B	50	40	8	0	0	0
BOX763	BOX763_C	1	681	1296	242	35.536	18.673
BOX763	BOX763_C	2	762	1533	292	38.32	19.048
BOX763	BOX763_C	3	771	1109	224	29.053	20.198
BOX763	BOX763_C	4	740	711	142	19.189	19.972
BOX763	BOX763_C	5	699	400	93	13.305	23.25
BOX763	BOX763_C	6	692	258	57	8.237	22.093
BOX763	BOX763_C	7	663	207	51	7.692	24.638
BOX763	BOX763_C	8	660	167	42	6.364	25.15
BOX763	BOX763_C	9	626	149	32	5.112	21.477
BOX763	BOX763_C	10	610	123	27	4.426	21.951
BOX763	BOX763_C	11	573	106	25	4.363	23.585
BOX763	BOX763_C	12	546	98	24	4.396	24.49
BOX763	BOX763_C	13	513	86	20	3.899	23.256
BOX763	BOX763_C	14	482	83	17	3.527	20.482
BOX763	BOX763_C	15	463	75	15	3.24	20
BOX763	BOX763_C	16	441	71	17	3.855	23.944
BOX763	BOX763_C	17	427	65	14	3.279	21.538
BOX763	BOX763_C	18	399	63	9	2.256	14.286
BOX763	BOX763_C	19	377	57	8	2.122	14.035
BOX763	BOX763_C	20	363	53	6	1.653	11.321
BOX763	BOX763_C	21	351	52	5	1.425	9.615
BOX763	BOX763_C	22	325	48	3	0.923	6.25
BOX763	BOX763_C	23	306	44	2	0.654	4.545
BOX763	BOX763_C	24	289	42	1	0.346	2.381
BOX763	BOX763_C	25	280	40	1	0.357	2.5
BOX763	BOX763_C	30	249	37	1	0.402	2.703
BOX763	BOX763_C	35	211	35	1	0.474	2.857
BOX763	BOX763_C	40	178	29	1	0.562	3.448
BOX763	BOX763_C	45	153	30	1	0.654	3.333
BOX763	BOX763_C	50	138	31	1	0.725	3.226
BOX764	BOX764_A	1	1947	2845	820	42.116	28.822
BOX764	BOX764_A	2	1793	1892	456	25.432	24.101
BOX764	BOX764_A	3	1550	933	229	14.774	24.544
BOX764	BOX764_A	4	1446	511	152	10.512	29.746
BOX764	BOX764_A	5	1464	292	78	5.328	26.712
BOX764	BOX764_A	6	1488	172	43	2.89	25
BOX764	BOX764_A	7	1509	125	31	2.054	24.8
BOX764	BOX764_A	8	1540	96	26	1.688	27.083
BOX764	BOX764_A	9	1551	70	14	0.903	20
BOX764	BOX764_A	10	1546	56	9	0.582	16.071
BOX764	BOX764_A	11	1544	41	9	0.583	21.951
BOX764	BOX764_A	12	1534	35	8	0.522	22.857
BOX764	BOX764_A	13	1533	25	5	0.326	20
BOX764	BOX764_A	14	1508	23	6	0.398	26.087
BOX764	BOX764_A	15	1475	19	3	0.203	15.789
BOX764	BOX764_A	16	1452	17	2	0.138	11.765
BOX764	BOX764_A	17	1413	15	3	0.212	20
BOX764	BOX764_A	18	1395	13	3	0.215	23.077
BOX764	BOX764_A	19	1367	14	3	0.219	21.429
BOX764	BOX764_A	20	1341	15	3	0.224	20
BOX764	BOX764_A	21	1318	14	3	0.228	21.429
BOX764	BOX764_A	22	1291	14	3	0.232	21.429
BOX764	BOX764_A	23	1258	13	3	0.238	23.077
BOX764	BOX764_A	24	1227	12	3	0.244	25
BOX764	BOX764_A	25	1190	12	3	0.252	25
BOX764	BOX764_A	30	1035	10	3	0.29	30
BOX764	BOX764_A	35	921	9	3	0.326	33.333
BOX764	BOX764_A	40	821	7	2	0.244	28.571
BOX764	BOX764_A	45	742	5	2	0.27	40
BOX764	BOX764_A	50	681	7	4	0.587	57.143
BOX764	BOX764_B	1	830	1068	343	41.325	32.116
BOX764	BOX764_B	2	820	869	296	36.098	34.062
BOX764	BOX764_B	3	586	361	99	16.894	27.424
BOX764	BOX764_B	4	439	143	28	6.378	19.58
BOX764	BOX764_B	5	344	81	12	3.488	14.815
BOX764	BOX764_B	6	292	53	6	2.055	11.321
BOX764	BOX764_B	7	267	47	6	2.247	12.766
BOX764	BOX764_B	8	245	39	7	2.857	17.949
BOX764	BOX764_B	9	228	33	5	2.193	15.152
BOX764	BOX764_B	10	214	27	2	0.935	7.407
BOX764	BOX764_B	11	204	24	1	0.49	4.167
BOX764	BOX764_B	12	200	24	0	0	0
BOX764	BOX764_B	13	192	26	0	0	0
BOX764	BOX764_B	14	192	20	0	0	0
BOX764	BOX764_B	15	179	20	0	0	0
BOX764	BOX764_B	16	176	20	0	0	0
BOX764	BOX764_B	17	166	19	0	0	0
BOX764	BOX764_B	18	153	20	0	0	0
BOX764	BOX764_B	19	150	16	0	0	0
BOX764	BOX764_B	20	150	14	0	0	0
BOX764	BOX764_B	21	140	14	0	0	0
BOX764	BOX764_B	22	136	14	0	0	0
BOX764	BOX764_B	23	131	11	0	0	0
BOX764	BOX764_B	24	129	12	0	0	0
BOX764	BOX764_B	25	123	12	0	0	0
BOX764	BOX764_B	30	105	12	0	0	0
BOX764	BOX764_B	35	89	8	0	0	0
BOX764	BOX764_B	40	81	6	0	0	0
BOX764	BOX764_B	45	76	4	0	0	0
BOX764	BOX764_B	50	72	4	0	0	0
BOX764	BOX764_C	1	951	934	288	30.284	30.835
BOX764	BOX764_C	2	1109	1175	407	36.7	34.638
BOX764	BOX764_C	3	1035	995	304	29.372	30.553
BOX764	BOX764_C	4	911	725	221	24.259	30.483
BOX764	BOX764_C	5	798	496	138	17.293	27.823
BOX764	BOX764_C	6	758	341	87	11.478	25.513
BOX764	BOX764_C	7	732	251	60	8.197	23.904
BOX764	BOX764_C	8	725	199	50	6.897	25.126
BOX764	BOX764_C	9	720	167	45	6.25	26.946
BOX764	BOX764_C	10	717	148	35	4.881	23.649
BOX764	BOX764_C	11	707	123	33	4.668	26.829
BOX764	BOX764_C	12	697	117	30	4.304	25.641
BOX764	BOX764_C	13	686	109	28	4.082	25.688
BOX764	BOX764_C	14	674	103	24	3.561	23.301
BOX764	BOX764_C	15	643	110	31	4.821	28.182
BOX764	BOX764_C	16	630	114	38	6.032	33.333
BOX764	BOX764_C	17	624	115	40	6.41	34.783
BOX764	BOX764_C	18	609	122	38	6.24	31.148
BOX764	BOX764_C	19	600	126	36	6	28.571
BOX764	BOX764_C	20	593	124	40	6.745	32.258
BOX764	BOX764_C	21	576	125	39	6.771	31.2
BOX764	BOX764_C	22	571	123	40	7.005	32.52
BOX764	BOX764_C	23	553	123	37	6.691	30.081
BOX764	BOX764_C	24	553	121	43	7.776	35.537
BOX764	BOX764_C	25	544	111	40	7.353	36.036
BOX764	BOX764_C	30	492	88	27	5.488	30.682
BOX764	BOX764_C	35	443	61	14	3.16	22.951
BOX764	BOX764_C	40	401	38	5	1.247	13.158
BOX764	BOX764_C	45	355	33	4	1.127	12.121
BOX764	BOX764_C	50	340	29	2	0.588	6.897
BOX764	BOX764_D	1	549	655	211	38.434	32.214
BOX764	BOX764_D	2	372	472	96	25.806	20.339
BOX764	BOX764_D	3	302	201	40	13.245	19.9
BOX764	BOX764_D	4	299	111	20	6.689	18.018
BOX764	BOX764_D	5	278	78	13	4.676	16.667
BOX764	BOX764_D	6	266	65	12	4.511	18.462
BOX764	BOX764_D	7	262	51	7	2.672	13.725
BOX764	BOX764_D	8	249	50	5	2.008	10
BOX764	BOX764_D	9	235	41	5	2.128	12.195
BOX764	BOX764_D	10	224	31	5	2.232	16.129
BOX764	BOX764_D	11	211	28	4	1.896	14.286
BOX764	BOX764_D	12	202	25	3	1.485	12
BOX764	BOX764_D	13	188	24	2	1.064	8.333
BOX764	BOX764_D	14	182	23	2	1.099	8.696
BOX764	BOX764_D	15	175	21	2	1.143	9.524
BOX764	BOX764_D	16	167	16	1	0.599	6.25
BOX764	BOX764_D	17	163	12	1	0.613	8.333
BOX764	BOX764_D	18	160	12	1	0.625	8.333
BOX764	BOX764_D	19	155	11	1	0.645	9.091
BOX764	BOX764_D	20	151	8	1	0.662	12.5
BOX764	BOX764_D	21	151	8	1	0.662	12.5
BOX764	BOX764_D	22	148	6	1	0.676	16.667
BOX764	BOX764_D	23	147	5	1	0.68	20
BOX764	BOX764_D	24	142	5	0	0	0
BOX764	BOX764_D	25	139	3	0	0	0
BOX764	BOX764_D	30	127	4	0	0	0
BOX764	BOX764_D	35	122	4	0	0	0
BOX764	BOX764_D	40	121	4	0	0	0
BOX764	BOX764_D	45	118	3	0	0	0
BOX764	BOX764_D	50	114	2	0	0	0
BOX764	BOX764_E	1	1740	1510	529	30.402	35.033
BOX764	BOX764_E	2	940	719	163	17.34	22.67
BOX764	BOX764_E	3	649	384	78	12.018	20.312
BOX764	BOX764_E	4	522	312	50	9.579	16.026
BOX764	BOX764_E	5	417	253	32	7.674	12.648
BOX764	BOX764_E	6	357	199	22	6.162	11.055
BOX764	BOX764_E	7	328	152	11	3.354	7.237
BOX764	BOX764_E	8	310	128	7	2.258	5.469
BOX764	BOX764_E	9	299	104	6	2.007	5.769
BOX764	BOX764_E	10	299	86	5	1.672	5.814
BOX764	BOX764_E	11	288	79	5	1.736	6.329
BOX764	BOX764_E	12	285	72	6	2.105	8.333
BOX764	BOX764_E	13	272	63	5	1.838	7.937
BOX764	BOX764_E	14	270	56	4	1.481	7.143
BOX764	BOX764_E	15	271	53	3	1.107	5.66
BOX764	BOX764_E	16	268	49	3	1.119	6.122
BOX764	BOX764_E	17	263	46	3	1.141	6.522
BOX764	BOX764_E	18	262	44	3	1.145	6.818
BOX764	BOX764_E	19	259	43	2	0.772	4.651
BOX764	BOX764_E	20	260	43	2	0.769	4.651
BOX764	BOX764_E	21	255	44	2	0.784	4.545
BOX764	BOX764_E	22	248	44	3	1.21	6.818
BOX764	BOX764_E	23	250	47	3	1.2	6.383
BOX764	BOX764_E	24	247	47	3	1.215	6.383
BOX764	BOX764_E	25	243	42	3	1.235	7.143
BOX764	BOX764_E	30	226	43	2	0.885	4.651
BOX764	BOX764_E	35	214	27	3	1.402	11.111
BOX764	BOX764_E	40	193	23	1	0.518	4.348
BOX764	BOX764_E	45	183	26	1	0.546	3.846
BOX764	BOX764_E	50	177	23	1	0.565	4.348

## Sheet: Figure S2D
genotype	animal_num	threshold	ch1_spots	ch2_spots	coloc_spots	ch1_percent	ch2_percent
BOX835	BOX835_A	1	804	420	147	18.284	35
BOX835	BOX835_A	2	885	672	237	26.78	35.268
BOX835	BOX835_A	3	668	783	220	32.934	28.097
BOX835	BOX835_A	4	503	765	166	33.002	21.699
BOX835	BOX835_A	5	371	701	118	31.806	16.833
BOX835	BOX835_A	6	313	595	81	25.879	13.613
BOX835	BOX835_A	7	262	485	60	22.901	12.371
BOX835	BOX835_A	8	240	378	45	18.75	11.905
BOX835	BOX835_A	9	226	303	37	16.372	12.211
BOX835	BOX835_A	10	217	241	24	11.06	9.959
BOX835	BOX835_A	11	200	187	17	8.5	9.091
BOX835	BOX835_A	12	195	162	14	7.179	8.642
BOX835	BOX835_A	13	189	137	11	5.82	8.029
BOX835	BOX835_A	14	185	115	10	5.405	8.696
BOX835	BOX835_A	15	182	93	7	3.846	7.527
BOX835	BOX835_A	16	181	82	7	3.867	8.537
BOX835	BOX835_A	17	175	69	6	3.429	8.696
BOX835	BOX835_A	18	176	57	3	1.705	5.263
BOX835	BOX835_A	19	176	45	2	1.136	4.444
BOX835	BOX835_A	20	173	41	2	1.156	4.878
BOX835	BOX835_A	21	169	34	2	1.183	5.882
BOX835	BOX835_A	22	166	28	3	1.807	10.714
BOX835	BOX835_A	23	164	22	2	1.22	9.091
BOX835	BOX835_A	24	163	14	1	0.613	7.143
BOX835	BOX835_A	25	161	13	1	0.621	7.692
BOX835	BOX835_A	30	149	5	1	0.671	20
BOX835	BOX835_A	35	140	2	1	0.714	50
BOX835	BOX835_A	40	127	2	1	0.787	50
BOX835	BOX835_A	45	115	1	1	0.87	100
BOX835	BOX835_A	50	104	1	1	0.962	100
BOX835	BOX835_B	1	1424	738	262	18.399	35.501
BOX835	BOX835_B	2	1614	1114	453	28.067	40.664
BOX835	BOX835_B	3	1035	1229	273	26.377	22.213
BOX835	BOX835_B	4	637	1139	155	24.333	13.608
BOX835	BOX835_B	5	434	950	89	20.507	9.368
BOX835	BOX835_B	6	331	788	51	15.408	6.472
BOX835	BOX835_B	7	284	673	40	14.085	5.944
BOX835	BOX835_B	8	250	555	34	13.6	6.126
BOX835	BOX835_B	9	230	462	27	11.739	5.844
BOX835	BOX835_B	10	213	393	25	11.737	6.361
BOX835	BOX835_B	11	205	338	16	7.805	4.734
BOX835	BOX835_B	12	197	300	14	7.107	4.667
BOX835	BOX835_B	13	193	257	11	5.699	4.28
BOX835	BOX835_B	14	186	237	9	4.839	3.797
BOX835	BOX835_B	15	179	228	5	2.793	2.193
BOX835	BOX835_B	16	176	217	5	2.841	2.304
BOX835	BOX835_B	17	174	197	2	1.149	1.015
BOX835	BOX835_B	18	172	179	3	1.744	1.676
BOX835	BOX835_B	19	168	158	2	1.19	1.266
BOX835	BOX835_B	20	162	141	3	1.852	2.128
BOX835	BOX835_B	21	156	134	3	1.923	2.239
BOX835	BOX835_B	22	149	120	3	2.013	2.5
BOX835	BOX835_B	23	146	110	3	2.055	2.727
BOX835	BOX835_B	24	144	99	2	1.389	2.02
BOX835	BOX835_B	25	141	78	1	0.709	1.282
BOX835	BOX835_B	30	130	36	0	0	0
BOX835	BOX835_B	35	120	15	0	0	0
BOX835	BOX835_B	40	111	7	0	0	0
BOX835	BOX835_B	45	108	6	0	0	0
BOX835	BOX835_B	50	101	3	0	0	0
BOX835	BOX835_C	1	853	540	129	15.123	23.889
BOX835	BOX835_C	2	891	763	197	22.11	25.819
BOX835	BOX835_C	3	840	938	218	25.952	23.241
BOX835	BOX835_C	4	756	1001	214	28.307	21.379
BOX835	BOX835_C	5	663	932	190	28.658	20.386
BOX835	BOX835_C	6	594	856	166	27.946	19.393
BOX835	BOX835_C	7	555	741	136	24.505	18.354
BOX835	BOX835_C	8	525	650	115	21.905	17.692
BOX835	BOX835_C	9	499	548	91	18.236	16.606
BOX835	BOX835_C	10	493	479	70	14.199	14.614
BOX835	BOX835_C	11	473	423	57	12.051	13.475
BOX835	BOX835_C	12	460	359	44	9.565	12.256
BOX835	BOX835_C	13	449	290	37	8.241	12.759
BOX835	BOX835_C	14	446	254	31	6.951	12.205
BOX835	BOX835_C	15	441	223	23	5.215	10.314
BOX835	BOX835_C	16	437	209	18	4.119	8.612
BOX835	BOX835_C	17	434	185	16	3.687	8.649
BOX835	BOX835_C	18	429	159	17	3.963	10.692
BOX835	BOX835_C	19	428	145	12	2.804	8.276
BOX835	BOX835_C	20	430	131	12	2.791	9.16
BOX835	BOX835_C	21	430	119	11	2.558	9.244
BOX835	BOX835_C	22	428	108	12	2.804	11.111
BOX835	BOX835_C	23	429	87	9	2.098	10.345
BOX835	BOX835_C	24	425	80	8	1.882	10
BOX835	BOX835_C	25	429	69	10	2.331	14.493
BOX835	BOX835_C	30	428	31	3	0.701	9.677
BOX835	BOX835_C	35	419	25	3	0.716	12
BOX835	BOX835_C	40	423	15	3	0.709	20
BOX835	BOX835_C	45	424	13	3	0.708	23.077
BOX835	BOX835_C	50	423	7	2	0.473	28.571
BOX835	BOX835_D	1	235	170	51	21.702	30
BOX835	BOX835_D	2	217	231	65	29.954	28.139
BOX835	BOX835_D	3	158	242	47	29.747	19.421
BOX835	BOX835_D	4	136	214	36	26.471	16.822
BOX835	BOX835_D	5	109	185	29	26.606	15.676
BOX835	BOX835_D	6	102	149	23	22.549	15.436
BOX835	BOX835_D	7	88	119	17	19.318	14.286
BOX835	BOX835_D	8	85	97	16	18.824	16.495
BOX835	BOX835_D	9	79	90	14	17.722	15.556
BOX835	BOX835_D	10	77	79	9	11.688	11.392
BOX835	BOX835_D	11	76	66	8	10.526	12.121
BOX835	BOX835_D	12	77	55	9	11.688	16.364
BOX835	BOX835_D	13	75	44	6	8	13.636
BOX835	BOX835_D	14	76	37	4	5.263	10.811
BOX835	BOX835_D	15	73	29	4	5.479	13.793
BOX835	BOX835_D	16	76	26	4	5.263	15.385
BOX835	BOX835_D	17	72	19	1	1.389	5.263
BOX835	BOX835_D	18	72	18	1	1.389	5.556
BOX835	BOX835_D	19	73	15	1	1.37	6.667
BOX835	BOX835_D	20	70	14	1	1.429	7.143
BOX835	BOX835_D	21	70	10	1	1.429	10
BOX835	BOX835_D	22	71	7	0	0	0
BOX835	BOX835_D	23	71	6	0	0	0
BOX835	BOX835_D	24	72	5	0	0	0
BOX835	BOX835_D	25	73	4	0	0	0
BOX835	BOX835_D	30	74	3	0	0	0
BOX835	BOX835_D	35	74	2	0	0	0
BOX835	BOX835_D	40	73	1	0	0	0
BOX835	BOX835_D	45	72	0	0	0	NaN
BOX835	BOX835_D	50	69	0	0	0	NaN
BOX835	BOX835_E	1	977	1865	450	46.059	24.129
BOX835	BOX835_E	2	1305	1271	365	27.969	28.718
BOX835	BOX835_E	3	1296	539	146	11.265	27.087
BOX835	BOX835_E	4	1095	212	51	4.658	24.057
BOX835	BOX835_E	5	886	119	31	3.499	26.05
BOX835	BOX835_E	6	734	84	20	2.725	23.81
BOX835	BOX835_E	7	647	63	15	2.318	23.81
BOX835	BOX835_E	8	574	52	10	1.742	19.231
BOX835	BOX835_E	9	537	44	9	1.676	20.455
BOX835	BOX835_E	10	494	33	9	1.822	27.273
BOX835	BOX835_E	11	481	31	7	1.455	22.581
BOX835	BOX835_E	12	462	20	4	0.866	20
BOX835	BOX835_E	13	460	13	4	0.87	30.769
BOX835	BOX835_E	14	450	11	4	0.889	36.364
BOX835	BOX835_E	15	434	8	4	0.922	50
BOX835	BOX835_E	16	433	8	4	0.924	50
BOX835	BOX835_E	17	423	6	2	0.473	33.333
BOX835	BOX835_E	18	412	5	1	0.243	20
BOX835	BOX835_E	19	399	5	1	0.251	20
BOX835	BOX835_E	20	393	4	0	0	0
BOX835	BOX835_E	21	389	1	0	0	0
BOX835	BOX835_E	22	380	1	0	0	0
BOX835	BOX835_E	23	376	1	0	0	0
BOX835	BOX835_E	24	370	1	0	0	0
BOX835	BOX835_E	25	368	1	0	0	0
BOX835	BOX835_E	30	345	0	0	0	NaN
BOX835	BOX835_E	35	316	0	0	0	NaN
BOX835	BOX835_E	40	292	0	0	0	NaN
BOX835	BOX835_E	45	266	0	0	0	NaN
BOX835	BOX835_E	50	253	0	0	0	NaN
BOX762	BOX762_A	1	2668	2437	974	36.507	39.967
BOX762	BOX762_A	2	2128	1354	444	20.865	32.792
BOX762	BOX762_A	3	1251	855	189	15.108	22.105
BOX762	BOX762_A	4	854	569	104	12.178	18.278
BOX762	BOX762_A	5	653	388	62	9.495	15.979
BOX762	BOX762_A	6	569	270	42	7.381	15.556
BOX762	BOX762_A	7	489	167	28	5.726	16.766
BOX762	BOX762_A	8	446	109	17	3.812	15.596
BOX762	BOX762_A	9	409	83	8	1.956	9.639
BOX762	BOX762_A	10	385	57	6	1.558	10.526
BOX762	BOX762_A	11	352	43	6	1.705	13.953
BOX762	BOX762_A	12	327	29	3	0.917	10.345
BOX762	BOX762_A	13	315	21	1	0.317	4.762
BOX762	BOX762_A	14	302	15	1	0.331	6.667
BOX762	BOX762_A	15	289	14	1	0.346	7.143
BOX762	BOX762_A	16	273	9	1	0.366	11.111
BOX762	BOX762_A	17	264	6	1	0.379	16.667
BOX762	BOX762_A	18	256	6	1	0.391	16.667
BOX762	BOX762_A	19	248	4	0	0	0
BOX762	BOX762_A	20	243	3	0	0	0
BOX762	BOX762_A	21	236	1	0	0	0
BOX762	BOX762_A	22	227	1	0	0	0
BOX762	BOX762_A	23	223	1	0	0	0
BOX762	BOX762_A	24	216	1	0	0	0
BOX762	BOX762_A	25	208	0	0	0	NaN
BOX762	BOX762_A	30	173	0	0	0	NaN
BOX762	BOX762_A	35	153	0	0	0	NaN
BOX762	BOX762_A	40	136	0	0	0	NaN
BOX762	BOX762_A	45	119	0	0	0	NaN
BOX762	BOX762_A	50	116	0	0	0	NaN
BOX762	BOX762_B	1	631	389	117	18.542	30.077
BOX762	BOX762_B	2	665	506	154	23.158	30.435
BOX762	BOX762_B	3	583	534	153	26.244	28.652
BOX762	BOX762_B	4	454	525	133	29.295	25.333
BOX762	BOX762_B	5	354	467	96	27.119	20.557
BOX762	BOX762_B	6	289	396	72	24.913	18.182
BOX762	BOX762_B	7	261	347	68	26.054	19.597
BOX762	BOX762_B	8	236	297	61	25.847	20.539
BOX762	BOX762_B	9	215	265	51	23.721	19.245
BOX762	BOX762_B	10	209	226	41	19.617	18.142
BOX762	BOX762_B	11	203	197	41	20.197	20.812
BOX762	BOX762_B	12	199	165	34	17.085	20.606
BOX762	BOX762_B	13	196	138	30	15.306	21.739
BOX762	BOX762_B	14	195	108	24	12.308	22.222
BOX762	BOX762_B	15	193	77	16	8.29	20.779
BOX762	BOX762_B	16	187	60	11	5.882	18.333
BOX762	BOX762_B	17	182	48	10	5.495	20.833
BOX762	BOX762_B	18	174	45	8	4.598	17.778
BOX762	BOX762_B	19	169	35	7	4.142	20
BOX762	BOX762_B	20	164	32	5	3.049	15.625
BOX762	BOX762_B	21	164	31	5	3.049	16.129
BOX762	BOX762_B	22	161	27	4	2.484	14.815
BOX762	BOX762_B	23	160	28	3	1.875	10.714
BOX762	BOX762_B	24	161	22	0	0	0
BOX762	BOX762_B	25	160	19	1	0.625	5.263
BOX762	BOX762_B	30	155	16	0	0	0
BOX762	BOX762_B	35	152	10	0	0	0
BOX762	BOX762_B	40	151	5	0	0	0
BOX762	BOX762_B	45	150	3	0	0	0
BOX762	BOX762_B	50	152	1	0	0	0
BOX762	BOX762_C	1	222	312	70	31.532	22.436
BOX762	BOX762_C	2	268	345	116	43.284	33.623
BOX762	BOX762_C	3	210	270	77	36.667	28.519
BOX762	BOX762_C	4	146	184	40	27.397	21.739
BOX762	BOX762_C	5	106	102	21	19.811	20.588
BOX762	BOX762_C	6	78	69	12	15.385	17.391
BOX762	BOX762_C	7	68	44	4	5.882	9.091
BOX762	BOX762_C	8	63	36	2	3.175	5.556
BOX762	BOX762_C	9	56	29	2	3.571	6.897
BOX762	BOX762_C	10	55	24	3	5.455	12.5
BOX762	BOX762_C	11	50	21	3	6	14.286
BOX762	BOX762_C	12	45	19	4	8.889	21.053
BOX762	BOX762_C	13	48	20	4	8.333	20
BOX762	BOX762_C	14	48	18	4	8.333	22.222
BOX762	BOX762_C	15	48	16	4	8.333	25
BOX762	BOX762_C	16	52	16	4	7.692	25
BOX762	BOX762_C	17	53	16	4	7.547	25
BOX762	BOX762_C	18	52	15	4	7.692	26.667
BOX762	BOX762_C	19	53	15	3	5.66	20
BOX762	BOX762_C	20	49	15	3	6.122	20
BOX762	BOX762_C	21	46	15	2	4.348	13.333
BOX762	BOX762_C	22	43	13	1	2.326	7.692
BOX762	BOX762_C	23	42	13	1	2.381	7.692
BOX762	BOX762_C	24	38	13	1	2.632	7.692
BOX762	BOX762_C	25	38	12	1	2.632	8.333
BOX762	BOX762_C	30	31	9	0	0	0
BOX762	BOX762_C	35	29	8	1	3.448	12.5
BOX762	BOX762_C	40	27	8	1	3.704	12.5
BOX762	BOX762_C	45	29	8	2	6.897	25
BOX762	BOX762_C	50	29	8	2	6.897	25
BOX762	BOX762_D	1	1280	1233	376	29.375	30.495
BOX762	BOX762_D	2	1425	1497	467	32.772	31.196
BOX762	BOX762_D	3	1147	1283	349	30.427	27.202
BOX762	BOX762_D	4	892	1007	226	25.336	22.443
BOX762	BOX762_D	5	722	781	153	21.191	19.59
BOX762	BOX762_D	6	606	579	99	16.337	17.098
BOX762	BOX762_D	7	570	461	96	16.842	20.824
BOX762	BOX762_D	8	523	356	77	14.723	21.629
BOX762	BOX762_D	9	494	314	66	13.36	21.019
BOX762	BOX762_D	10	475	294	63	13.263	21.429
BOX762	BOX762_D	11	456	272	53	11.623	19.485
BOX762	BOX762_D	12	447	252	58	12.975	23.016
BOX762	BOX762_D	13	434	242	55	12.673	22.727
BOX762	BOX762_D	14	423	226	55	13.002	24.336
BOX762	BOX762_D	15	413	200	52	12.591	26
BOX762	BOX762_D	16	414	181	50	12.077	27.624
BOX762	BOX762_D	17	414	169	46	11.111	27.219
BOX762	BOX762_D	18	408	160	41	10.049	25.625
BOX762	BOX762_D	19	397	144	41	10.327	28.472
BOX762	BOX762_D	20	396	137	40	10.101	29.197
BOX762	BOX762_D	21	390	135	44	11.282	32.593
BOX762	BOX762_D	22	391	127	44	11.253	34.646
BOX762	BOX762_D	23	395	122	44	11.139	36.066
BOX762	BOX762_D	24	386	116	40	10.363	34.483
BOX762	BOX762_D	25	386	109	37	9.585	33.945
BOX762	BOX762_D	30	361	79	26	7.202	32.911
BOX762	BOX762_D	35	330	69	19	5.758	27.536
BOX762	BOX762_D	40	305	61	16	5.246	26.23
BOX762	BOX762_D	45	272	55	13	4.779	23.636
BOX762	BOX762_D	50	243	47	9	3.704	19.149
BOX762	BOX762_E	1	731	792	205	28.044	25.884
BOX762	BOX762_E	2	744	892	228	30.645	25.561
BOX762	BOX762_E	3	648	720	173	26.698	24.028
BOX762	BOX762_E	4	530	500	109	20.566	21.8
BOX762	BOX762_E	5	440	363	71	16.136	19.559
BOX762	BOX762_E	6	373	262	54	14.477	20.611
BOX762	BOX762_E	7	339	213	45	13.274	21.127
BOX762	BOX762_E	8	328	178	43	13.11	24.157
BOX762	BOX762_E	9	318	149	42	13.208	28.188
BOX762	BOX762_E	10	308	119	35	11.364	29.412
BOX762	BOX762_E	11	302	95	29	9.603	30.526
BOX762	BOX762_E	12	304	88	24	7.895	27.273
BOX762	BOX762_E	13	307	89	22	7.166	24.719
BOX762	BOX762_E	14	306	83	20	6.536	24.096
BOX762	BOX762_E	15	306	80	20	6.536	25
BOX762	BOX762_E	16	310	79	22	7.097	27.848
BOX762	BOX762_E	17	302	76	22	7.285	28.947
BOX762	BOX762_E	18	304	73	20	6.579	27.397
BOX762	BOX762_E	19	303	67	19	6.271	28.358
BOX762	BOX762_E	20	305	69	20	6.557	28.986
BOX762	BOX762_E	21	299	65	17	5.686	26.154
BOX762	BOX762_E	22	296	65	18	6.081	27.692
BOX762	BOX762_E	23	297	64	18	6.061	28.125
BOX762	BOX762_E	24	287	62	19	6.62	30.645
BOX762	BOX762_E	25	285	61	20	7.018	32.787
BOX762	BOX762_E	30	276	54	17	6.159	31.481
BOX762	BOX762_E	35	269	39	17	6.32	43.59
BOX762	BOX762_E	40	262	35	16	6.107	45.714
BOX762	BOX762_E	45	251	32	12	4.781	37.5
BOX762	BOX762_E	50	234	23	6	2.564	26.087

## Sheet: Figure S2E
genotype	animal_num	threshold	ch1_spots	ch2_spots	coloc_spots	ch1_percent	ch2_percent
BOX788	BOX788_A	1	781	905	176	22.535	19.448
BOX788	BOX788_A	2	896	998	257	28.683	25.752
BOX788	BOX788_A	3	974	885	253	25.975	28.588
BOX788	BOX788_A	4	1044	722	226	21.648	31.302
BOX788	BOX788_A	5	1024	586	183	17.871	31.229
BOX788	BOX788_A	6	994	450	154	15.493	34.222
BOX788	BOX788_A	7	933	337	117	12.54	34.718
BOX788	BOX788_A	8	879	253	82	9.329	32.411
BOX788	BOX788_A	9	813	207	62	7.626	29.952
BOX788	BOX788_A	10	761	168	49	6.439	29.167
BOX788	BOX788_A	11	702	147	44	6.268	29.932
BOX788	BOX788_A	12	654	125	35	5.352	28
BOX788	BOX788_A	13	613	108	26	4.241	24.074
BOX788	BOX788_A	14	567	90	18	3.175	20
BOX788	BOX788_A	15	542	83	17	3.137	20.482
BOX788	BOX788_A	16	514	77	14	2.724	18.182
BOX788	BOX788_A	17	495	71	9	1.818	12.676
BOX788	BOX788_A	18	483	66	10	2.07	15.152
BOX788	BOX788_A	19	479	54	6	1.253	11.111
BOX788	BOX788_A	20	465	43	7	1.505	16.279
BOX788	BOX788_A	21	450	38	7	1.556	18.421
BOX788	BOX788_A	22	447	37	6	1.342	16.216
BOX788	BOX788_A	23	443	29	5	1.129	17.241
BOX788	BOX788_A	24	433	27	4	0.924	14.815
BOX788	BOX788_A	25	428	21	3	0.701	14.286
BOX788	BOX788_A	30	422	13	3	0.711	23.077
BOX788	BOX788_A	35	409	5	1	0.244	20
BOX788	BOX788_A	40	395	2	1	0.253	50
BOX788	BOX788_A	45	389	0	0	0	NaN
BOX788	BOX788_A	50	382	0	0	0	NaN
BOX788	BOX788_B	1	1635	1793	355	21.713	19.799
BOX788	BOX788_B	2	1800	2077	478	26.556	23.014
BOX788	BOX788_B	3	1896	1864	449	23.681	24.088
BOX788	BOX788_B	4	1868	1513	403	21.574	26.636
BOX788	BOX788_B	5	1800	1258	326	18.111	25.914
BOX788	BOX788_B	6	1727	1011	266	15.402	26.311
BOX788	BOX788_B	7	1671	870	220	13.166	25.287
BOX788	BOX788_B	8	1615	758	192	11.889	25.33
BOX788	BOX788_B	9	1573	648	162	10.299	25
BOX788	BOX788_B	10	1514	551	140	9.247	25.408
BOX788	BOX788_B	11	1472	454	115	7.812	25.33
BOX788	BOX788_B	12	1423	389	93	6.535	23.907
BOX788	BOX788_B	13	1394	328	77	5.524	23.476
BOX788	BOX788_B	14	1358	265	61	4.492	23.019
BOX788	BOX788_B	15	1345	228	48	3.569	21.053
BOX788	BOX788_B	16	1326	175	31	2.338	17.714
BOX788	BOX788_B	17	1317	146	18	1.367	12.329
BOX788	BOX788_B	18	1298	124	19	1.464	15.323
BOX788	BOX788_B	19	1288	113	17	1.32	15.044
BOX788	BOX788_B	20	1259	109	18	1.43	16.514
BOX788	BOX788_B	21	1230	98	15	1.22	15.306
BOX788	BOX788_B	22	1214	81	12	0.988	14.815
BOX788	BOX788_B	23	1191	68	11	0.924	16.176
BOX788	BOX788_B	24	1181	61	10	0.847	16.393
BOX788	BOX788_B	25	1171	55	8	0.683	14.545
BOX788	BOX788_B	30	1138	38	6	0.527	15.789
BOX788	BOX788_B	35	1071	18	0	0	0
BOX788	BOX788_B	40	1024	10	0	0	0
BOX788	BOX788_B	45	1004	5	1	0.1	20
BOX788	BOX788_B	50	969	1	1	0.103	100
BOX788	BOX788_C	1	1951	2118	583	29.882	27.526
BOX788	BOX788_C	2	2268	2389	714	31.481	29.887
BOX788	BOX788_C	3	2274	1895	596	26.209	31.451
BOX788	BOX788_C	4	2080	1396	414	19.904	29.656
BOX788	BOX788_C	5	1830	1041	287	15.683	27.57
BOX788	BOX788_C	6	1568	795	186	11.862	23.396
BOX788	BOX788_C	7	1355	593	119	8.782	20.067
BOX788	BOX788_C	8	1183	471	85	7.185	18.047
BOX788	BOX788_C	9	1065	377	64	6.009	16.976
BOX788	BOX788_C	10	962	338	50	5.198	14.793
BOX788	BOX788_C	11	898	297	39	4.343	13.131
BOX788	BOX788_C	12	841	263	29	3.448	11.027
BOX788	BOX788_C	13	812	224	22	2.709	9.821
BOX788	BOX788_C	14	780	207	20	2.564	9.662
BOX788	BOX788_C	15	748	191	20	2.674	10.471
BOX788	BOX788_C	16	727	182	18	2.476	9.89
BOX788	BOX788_C	17	710	172	16	2.254	9.302
BOX788	BOX788_C	18	705	151	15	2.128	9.934
BOX788	BOX788_C	19	697	129	13	1.865	10.078
BOX788	BOX788_C	20	686	113	11	1.603	9.735
BOX788	BOX788_C	21	679	104	10	1.473	9.615
BOX788	BOX788_C	22	677	97	10	1.477	10.309
BOX788	BOX788_C	23	669	82	10	1.495	12.195
BOX788	BOX788_C	24	668	73	7	1.048	9.589
BOX788	BOX788_C	25	664	67	6	0.904	8.955
BOX788	BOX788_C	30	651	37	5	0.768	13.514
BOX788	BOX788_C	35	638	23	3	0.47	13.043
BOX788	BOX788_C	40	626	15	1	0.16	6.667
BOX788	BOX788_C	45	603	12	1	0.166	8.333
BOX788	BOX788_C	50	583	4	0	0	0
BOX788	BOX788_D	1	3174	3360	1073	33.806	31.935
BOX788	BOX788_D	2	3171	3245	974	30.716	30.015
BOX788	BOX788_D	3	2401	2238	525	21.866	23.458
BOX788	BOX788_D	4	1860	1554	314	16.882	20.206
BOX788	BOX788_D	5	1605	1101	188	11.713	17.075
BOX788	BOX788_D	6	1469	784	128	8.713	16.327
BOX788	BOX788_D	7	1382	578	94	6.802	16.263
BOX788	BOX788_D	8	1289	454	75	5.818	16.52
BOX788	BOX788_D	9	1216	353	56	4.605	15.864
BOX788	BOX788_D	10	1170	302	47	4.017	15.563
BOX788	BOX788_D	11	1140	261	40	3.509	15.326
BOX788	BOX788_D	12	1116	216	30	2.688	13.889
BOX788	BOX788_D	13	1094	185	24	2.194	12.973
BOX788	BOX788_D	14	1070	159	21	1.963	13.208
BOX788	BOX788_D	15	1054	145	17	1.613	11.724
BOX788	BOX788_D	16	1030	123	11	1.068	8.943
BOX788	BOX788_D	17	1016	109	10	0.984	9.174
BOX788	BOX788_D	18	999	91	7	0.701	7.692
BOX788	BOX788_D	19	990	83	6	0.606	7.229
BOX788	BOX788_D	20	977	72	5	0.512	6.944
BOX788	BOX788_D	21	964	59	3	0.311	5.085
BOX788	BOX788_D	22	949	49	4	0.421	8.163
BOX788	BOX788_D	23	935	43	3	0.321	6.977
BOX788	BOX788_D	24	933	38	3	0.322	7.895
BOX788	BOX788_D	25	923	30	3	0.325	10
BOX788	BOX788_D	30	859	20	1	0.116	5
BOX788	BOX788_D	35	808	13	0	0	0
BOX788	BOX788_D	40	777	7	0	0	0
BOX788	BOX788_D	45	735	3	0	0	0
BOX788	BOX788_D	50	694	2	0	0	0
BOX788	BOX788_E	1	871	1263	309	35.476	24.466
BOX788	BOX788_E	2	961	1178	342	35.588	29.032
BOX788	BOX788_E	3	820	687	157	19.146	22.853
BOX788	BOX788_E	4	733	448	100	13.643	22.321
BOX788	BOX788_E	5	662	309	59	8.912	19.094
BOX788	BOX788_E	6	625	236	34	5.44	14.407
BOX788	BOX788_E	7	595	182	27	4.538	14.835
BOX788	BOX788_E	8	574	155	24	4.181	15.484
BOX788	BOX788_E	9	541	138	19	3.512	13.768
BOX788	BOX788_E	10	522	120	13	2.49	10.833
BOX788	BOX788_E	11	506	107	12	2.372	11.215
BOX788	BOX788_E	12	490	98	12	2.449	12.245
BOX788	BOX788_E	13	473	87	12	2.537	13.793
BOX788	BOX788_E	14	465	78	9	1.935	11.538
BOX788	BOX788_E	15	458	76	9	1.965	11.842
BOX788	BOX788_E	16	447	71	7	1.566	9.859
BOX788	BOX788_E	17	436	65	6	1.376	9.231
BOX788	BOX788_E	18	422	57	7	1.659	12.281
BOX788	BOX788_E	19	414	52	6	1.449	11.538
BOX788	BOX788_E	20	409	45	6	1.467	13.333
BOX788	BOX788_E	21	400	37	5	1.25	13.514
BOX788	BOX788_E	22	388	28	3	0.773	10.714
BOX788	BOX788_E	23	382	24	3	0.785	12.5
BOX788	BOX788_E	24	382	21	3	0.785	14.286
BOX788	BOX788_E	25	377	16	2	0.531	12.5
BOX788	BOX788_E	30	346	11	2	0.578	18.182
BOX788	BOX788_E	35	328	9	0	0	0
BOX788	BOX788_E	40	298	7	0	0	0
BOX788	BOX788_E	45	280	4	0	0	0
BOX788	BOX788_E	50	260	2	0	0	0
BOX767	BOX767_A	1	1179	1425	426	36.132	29.895
BOX767	BOX767_A	2	1649	1514	608	36.871	40.159
BOX767	BOX767_A	3	1474	1063	417	28.29	39.229
BOX767	BOX767_A	4	1073	668	210	19.571	31.437
BOX767	BOX767_A	5	762	443	116	15.223	26.185
BOX767	BOX767_A	6	564	314	64	11.348	20.382
BOX767	BOX767_A	7	436	250	55	12.615	22
BOX767	BOX767_A	8	372	170	40	10.753	23.529
BOX767	BOX767_A	9	326	126	27	8.282	21.429
BOX767	BOX767_A	10	288	89	22	7.639	24.719
BOX767	BOX767_A	11	262	70	18	6.87	25.714
BOX767	BOX767_A	12	246	54	16	6.504	29.63
BOX767	BOX767_A	13	227	44	10	4.405	22.727
BOX767	BOX767_A	14	205	30	6	2.927	20
BOX767	BOX767_A	15	198	17	3	1.515	17.647
BOX767	BOX767_A	16	187	14	1	0.535	7.143
BOX767	BOX767_A	17	176	13	1	0.568	7.692
BOX767	BOX767_A	18	167	11	1	0.599	9.091
BOX767	BOX767_A	19	160	9	1	0.625	11.111
BOX767	BOX767_A	20	149	7	1	0.671	14.286
BOX767	BOX767_A	21	142	6	1	0.704	16.667
BOX767	BOX767_A	22	133	6	1	0.752	16.667
BOX767	BOX767_A	23	128	6	1	0.781	16.667
BOX767	BOX767_A	24	126	6	1	0.794	16.667
BOX767	BOX767_A	25	123	6	1	0.813	16.667
BOX767	BOX767_A	30	96	3	0	0	0
BOX767	BOX767_A	35	85	3	0	0	0
BOX767	BOX767_A	40	73	1	0	0	0
BOX767	BOX767_A	45	63	0	0	0	NaN
BOX767	BOX767_A	50	54	0	0	0	NaN
BOX767	BOX767_B	1	492	448	122	24.797	27.232
BOX767	BOX767_B	2	570	550	171	30	31.091
BOX767	BOX767_B	3	568	557	174	30.634	31.239
BOX767	BOX767_B	4	516	498	134	25.969	26.908
BOX767	BOX767_B	5	473	409	99	20.93	24.205
BOX767	BOX767_B	6	426	348	77	18.075	22.126
BOX767	BOX767_B	7	397	311	62	15.617	19.936
BOX767	BOX767_B	8	379	253	50	13.193	19.763
BOX767	BOX767_B	9	362	221	43	11.878	19.457
BOX767	BOX767_B	10	360	196	38	10.556	19.388
BOX767	BOX767_B	11	350	154	27	7.714	17.532
BOX767	BOX767_B	12	347	136	30	8.646	22.059
BOX767	BOX767_B	13	338	128	23	6.805	17.969
BOX767	BOX767_B	14	335	125	25	7.463	20
BOX767	BOX767_B	15	323	120	28	8.669	23.333
BOX767	BOX767_B	16	313	111	28	8.946	25.225
BOX767	BOX767_B	17	304	97	26	8.553	26.804
BOX767	BOX767_B	18	292	89	26	8.904	29.213
BOX767	BOX767_B	19	285	77	20	7.018	25.974
BOX767	BOX767_B	20	275	77	21	7.636	27.273
BOX767	BOX767_B	21	269	67	15	5.576	22.388
BOX767	BOX767_B	22	261	67	15	5.747	22.388
BOX767	BOX767_B	23	254	64	14	5.512	21.875
BOX767	BOX767_B	24	248	57	10	4.032	17.544
BOX767	BOX767_B	25	238	51	10	4.202	19.608
BOX767	BOX767_B	30	222	29	4	1.802	13.793
BOX767	BOX767_B	35	209	20	2	0.957	10
BOX767	BOX767_B	40	199	16	1	0.503	6.25
BOX767	BOX767_B	45	191	8	1	0.524	12.5
BOX767	BOX767_B	50	186	6	1	0.538	16.667
BOX767	BOX767_C	1	1059	948	259	24.457	27.321
BOX767	BOX767_C	2	1141	1214	338	29.623	27.842
BOX767	BOX767_C	3	1136	1146	329	28.961	28.709
BOX767	BOX767_C	4	1067	923	269	25.211	29.144
BOX767	BOX767_C	5	1003	742	210	20.937	28.302
BOX767	BOX767_C	6	990	605	176	17.778	29.091
BOX767	BOX767_C	7	946	484	140	14.799	28.926
BOX767	BOX767_C	8	909	387	114	12.541	29.457
BOX767	BOX767_C	9	890	310	92	10.337	29.677
BOX767	BOX767_C	10	865	273	79	9.133	28.938
BOX767	BOX767_C	11	845	236	67	7.929	28.39
BOX767	BOX767_C	12	822	206	63	7.664	30.583
BOX767	BOX767_C	13	796	183	54	6.784	29.508
BOX767	BOX767_C	14	780	165	53	6.795	32.121
BOX767	BOX767_C	15	768	152	50	6.51	32.895
BOX767	BOX767_C	16	746	134	41	5.496	30.597
BOX767	BOX767_C	17	725	125	37	5.103	29.6
BOX767	BOX767_C	18	712	116	29	4.073	25
BOX767	BOX767_C	19	696	106	25	3.592	23.585
BOX767	BOX767_C	20	679	99	25	3.682	25.253
BOX767	BOX767_C	21	666	94	24	3.604	25.532
BOX767	BOX767_C	22	653	86	20	3.063	23.256
BOX767	BOX767_C	23	644	75	17	2.64	22.667
BOX767	BOX767_C	24	622	70	13	2.09	18.571
BOX767	BOX767_C	25	604	61	12	1.987	19.672
BOX767	BOX767_C	30	535	44	7	1.308	15.909
BOX767	BOX767_C	35	481	33	2	0.416	6.061
BOX767	BOX767_C	40	442	21	1	0.226	4.762
BOX767	BOX767_C	45	407	16	1	0.246	6.25
BOX767	BOX767_C	50	372	12	1	0.269	8.333
BOX767	BOX767_D	1	1035	1368	463	44.734	33.845
BOX767	BOX767_D	2	1158	1124	363	31.347	32.295
BOX767	BOX767_D	3	854	576	173	20.258	30.035
BOX767	BOX767_D	4	618	274	69	11.165	25.182
BOX767	BOX767_D	5	472	136	42	8.898	30.882
BOX767	BOX767_D	6	417	72	27	6.475	37.5
BOX767	BOX767_D	7	385	50	21	5.455	42
BOX767	BOX767_D	8	378	52	20	5.291	38.462
BOX767	BOX767_D	9	347	41	18	5.187	43.902
BOX767	BOX767_D	10	346	35	18	5.202	51.429
BOX767	BOX767_D	11	330	35	18	5.455	51.429
BOX767	BOX767_D	12	313	31	15	4.792	48.387
BOX767	BOX767_D	13	314	30	13	4.14	43.333
BOX767	BOX767_D	14	309	23	10	3.236	43.478
BOX767	BOX767_D	15	295	18	7	2.373	38.889
BOX767	BOX767_D	16	285	17	5	1.754	29.412
BOX767	BOX767_D	17	279	15	6	2.151	40
BOX767	BOX767_D	18	274	15	7	2.555	46.667
BOX767	BOX767_D	19	266	14	9	3.383	64.286
BOX767	BOX767_D	20	256	12	8	3.125	66.667
BOX767	BOX767_D	21	246	11	8	3.252	72.727
BOX767	BOX767_D	22	236	11	5	2.119	45.455
BOX767	BOX767_D	23	233	10	5	2.146	50
BOX767	BOX767_D	24	228	11	7	3.07	63.636
BOX767	BOX767_D	25	222	11	6	2.703	54.545
BOX767	BOX767_D	30	188	2	1	0.532	50
BOX767	BOX767_D	35	167	0	0	0	NaN
BOX767	BOX767_D	40	134	0	0	0	NaN
BOX767	BOX767_D	45	121	0	0	0	NaN
BOX767	BOX767_D	50	105	0	0	0	NaN
BOX767	BOX767_E	1	709	566	195	27.504	34.452
BOX767	BOX767_E	2	867	572	227	26.182	39.685
BOX767	BOX767_E	3	650	494	169	26	34.211
BOX767	BOX767_E	4	412	399	99	24.029	24.812
BOX767	BOX767_E	5	288	316	60	20.833	18.987
BOX767	BOX767_E	6	227	256	46	20.264	17.969
BOX767	BOX767_E	7	190	239	34	17.895	14.226
BOX767	BOX767_E	8	168	217	31	18.452	14.286
BOX767	BOX767_E	9	159	190	29	18.239	15.263
BOX767	BOX767_E	10	151	171	28	18.543	16.374
BOX767	BOX767_E	11	142	150	26	18.31	17.333
BOX767	BOX767_E	12	138	121	22	15.942	18.182
BOX767	BOX767_E	13	131	99	19	14.504	19.192
BOX767	BOX767_E	14	126	82	17	13.492	20.732
BOX767	BOX767_E	15	122	66	11	9.016	16.667
BOX767	BOX767_E	16	131	56	11	8.397	19.643
BOX767	BOX767_E	17	126	45	8	6.349	17.778
BOX767	BOX767_E	18	122	35	10	8.197	28.571
BOX767	BOX767_E	19	120	32	9	7.5	28.125
BOX767	BOX767_E	20	115	25	8	6.957	32
BOX767	BOX767_E	21	113	20	7	6.195	35
BOX767	BOX767_E	22	111	21	7	6.306	33.333
BOX767	BOX767_E	23	108	22	6	5.556	27.273
BOX767	BOX767_E	24	104	20	6	5.769	30
BOX767	BOX767_E	25	98	18	6	6.122	33.333
BOX767	BOX767_E	30	84	15	8	9.524	53.333
BOX767	BOX767_E	35	74	12	6	8.108	50
BOX767	BOX767_E	40	70	8	4	5.714	50
BOX767	BOX767_E	45	66	6	3	4.545	50
BOX767	BOX767_E	50	63	3	3	4.762	100
BOX768	BOX768_A	1	498	569	128	25.703	22.496
BOX768	BOX768_A	2	564	678	193	34.22	28.466
BOX768	BOX768_A	3	574	573	152	26.481	26.527
BOX768	BOX768_A	4	551	472	121	21.96	25.636
BOX768	BOX768_A	5	499	382	80	16.032	20.942
BOX768	BOX768_A	6	466	305	58	12.446	19.016
BOX768	BOX768_A	7	457	247	52	11.379	21.053
BOX768	BOX768_A	8	439	210	40	9.112	19.048
BOX768	BOX768_A	9	418	175	36	8.612	20.571
BOX768	BOX768_A	10	411	160	34	8.273	21.25
BOX768	BOX768_A	11	399	141	29	7.268	20.567
BOX768	BOX768_A	12	395	123	26	6.582	21.138
BOX768	BOX768_A	13	392	108	23	5.867	21.296
BOX768	BOX768_A	14	391	95	19	4.859	20
BOX768	BOX768_A	15	385	84	17	4.416	20.238
BOX768	BOX768_A	16	368	76	13	3.533	17.105
BOX768	BOX768_A	17	359	72	12	3.343	16.667
BOX768	BOX768_A	18	351	62	10	2.849	16.129
BOX768	BOX768_A	19	350	57	12	3.429	21.053
BOX768	BOX768_A	20	346	49	11	3.179	22.449
BOX768	BOX768_A	21	332	46	10	3.012	21.739
BOX768	BOX768_A	22	324	43	9	2.778	20.93
BOX768	BOX768_A	23	322	38	8	2.484	21.053
BOX768	BOX768_A	24	313	34	8	2.556	23.529
BOX768	BOX768_A	25	311	33	9	2.894	27.273
BOX768	BOX768_A	30	272	28	6	2.206	21.429
BOX768	BOX768_A	35	249	21	6	2.41	28.571
BOX768	BOX768_A	40	234	17	4	1.709	23.529
BOX768	BOX768_A	45	215	15	5	2.326	33.333
BOX768	BOX768_A	50	191	8	2	1.047	25
BOX768	BOX768_B	1	1532	2042	471	30.744	23.066
BOX768	BOX768_B	2	1686	2103	561	33.274	26.676
BOX768	BOX768_B	3	1716	1619	429	25	26.498
BOX768	BOX768_B	4	1621	1220	272	16.78	22.295
BOX768	BOX768_B	5	1555	1008	233	14.984	23.115
BOX768	BOX768_B	6	1527	857	209	13.687	24.387
BOX768	BOX768_B	7	1496	725	168	11.23	23.172
BOX768	BOX768_B	8	1500	611	149	9.933	24.386
BOX768	BOX768_B	9	1496	509	117	7.821	22.986
BOX768	BOX768_B	10	1470	433	98	6.667	22.633
BOX768	BOX768_B	11	1459	385	90	6.169	23.377
BOX768	BOX768_B	12	1456	346	84	5.769	24.277
BOX768	BOX768_B	13	1419	317	76	5.356	23.975
BOX768	BOX768_B	14	1403	284	67	4.775	23.592
BOX768	BOX768_B	15	1402	260	57	4.066	21.923
BOX768	BOX768_B	16	1372	240	51	3.717	21.25
BOX768	BOX768_B	17	1357	221	49	3.611	22.172
BOX768	BOX768_B	18	1340	203	45	3.358	22.167
BOX768	BOX768_B	19	1326	186	43	3.243	23.118
BOX768	BOX768_B	20	1305	172	38	2.912	22.093
BOX768	BOX768_B	21	1299	161	40	3.079	24.845
BOX768	BOX768_B	22	1288	156	36	2.795	23.077
BOX768	BOX768_B	23	1268	145	31	2.445	21.379
BOX768	BOX768_B	24	1254	138	30	2.392	21.739
BOX768	BOX768_B	25	1243	130	27	2.172	20.769
BOX768	BOX768_B	30	1158	92	20	1.727	21.739
BOX768	BOX768_B	35	1090	62	12	1.101	19.355
BOX768	BOX768_B	40	1045	52	13	1.244	25
BOX768	BOX768_B	45	1014	33	8	0.789	24.242
BOX768	BOX768_B	50	976	23	9	0.922	39.13
BOX768	BOX768_C	1	1824	2670	732	40.132	27.416
BOX768	BOX768_C	2	1936	1925	558	28.822	28.987
BOX768	BOX768_C	3	1786	1006	257	14.39	25.547
BOX768	BOX768_C	4	1617	679	170	10.513	25.037
BOX768	BOX768_C	5	1487	523	138	9.28	26.386
BOX768	BOX768_C	6	1380	421	108	7.826	25.653
BOX768	BOX768_C	7	1320	344	88	6.667	25.581
BOX768	BOX768_C	8	1310	293	79	6.031	26.962
BOX768	BOX768_C	9	1314	271	75	5.708	27.675
BOX768	BOX768_C	10	1277	245	76	5.951	31.02
BOX768	BOX768_C	11	1255	221	72	5.737	32.579
BOX768	BOX768_C	12	1236	204	64	5.178	31.373
BOX768	BOX768_C	13	1201	185	59	4.913	31.892
BOX768	BOX768_C	14	1169	167	49	4.192	29.341
BOX768	BOX768_C	15	1167	155	46	3.942	29.677
BOX768	BOX768_C	16	1152	150	47	4.08	31.333
BOX768	BOX768_C	17	1144	136	45	3.934	33.088
BOX768	BOX768_C	18	1135	123	43	3.789	34.959
BOX768	BOX768_C	19	1130	110	39	3.451	35.455
BOX768	BOX768_C	20	1121	101	32	2.855	31.683
BOX768	BOX768_C	21	1111	90	30	2.7	33.333
BOX768	BOX768_C	22	1099	82	26	2.366	31.707
BOX768	BOX768_C	23	1093	78	27	2.47	34.615
BOX768	BOX768_C	24	1079	77	25	2.317	32.468
BOX768	BOX768_C	25	1058	70	22	2.079	31.429
BOX768	BOX768_C	30	1028	59	18	1.751	30.508
BOX768	BOX768_C	35	994	44	8	0.805	18.182
BOX768	BOX768_C	40	969	29	8	0.826	27.586
BOX768	BOX768_C	45	916	22	9	0.983	40.909
BOX768	BOX768_C	50	887	15	4	0.451	26.667
BOX768	BOX768_D	1	920	1219	390	42.391	31.993
BOX768	BOX768_D	2	795	604	174	21.887	28.808
BOX768	BOX768_D	3	584	270	75	12.842	27.778
BOX768	BOX768_D	4	488	177	59	12.09	33.333
BOX768	BOX768_D	5	429	126	42	9.79	33.333
BOX768	BOX768_D	6	407	102	36	8.845	35.294
BOX768	BOX768_D	7	395	76	26	6.582	34.211
BOX768	BOX768_D	8	372	62	21	5.645	33.871
BOX768	BOX768_D	9	356	61	21	5.899	34.426
BOX768	BOX768_D	10	347	51	18	5.187	35.294
BOX768	BOX768_D	11	335	40	12	3.582	30
BOX768	BOX768_D	12	331	35	10	3.021	28.571
BOX768	BOX768_D	13	326	31	10	3.067	32.258
BOX768	BOX768_D	14	323	27	7	2.167	25.926
BOX768	BOX768_D	15	320	25	5	1.562	20
BOX768	BOX768_D	16	317	19	3	0.946	15.789
BOX768	BOX768_D	17	308	18	4	1.299	22.222
BOX768	BOX768_D	18	305	18	4	1.311	22.222
BOX768	BOX768_D	19	302	17	4	1.325	23.529
BOX768	BOX768_D	20	299	16	3	1.003	18.75
BOX768	BOX768_D	21	298	16	3	1.007	18.75
BOX768	BOX768_D	22	296	14	3	1.014	21.429
BOX768	BOX768_D	23	295	12	2	0.678	16.667
BOX768	BOX768_D	24	296	11	2	0.676	18.182
BOX768	BOX768_D	25	291	10	3	1.031	30
BOX768	BOX768_D	30	285	5	2	0.702	40
BOX768	BOX768_D	35	272	3	0	0	0
BOX768	BOX768_D	40	269	0	0	0	NaN
BOX768	BOX768_D	45	261	0	0	0	NaN
BOX768	BOX768_D	50	253	0	0	0	NaN
BOX768	BOX768_E	1	171	328	73	42.69	22.256
BOX768	BOX768_E	2	180	300	75	41.667	25
BOX768	BOX768_E	3	198	174	41	20.707	23.563
BOX768	BOX768_E	4	207	82	24	11.594	29.268
BOX768	BOX768_E	5	212	52	15	7.075	28.846
BOX768	BOX768_E	6	218	37	11	5.046	29.73
BOX768	BOX768_E	7	227	27	7	3.084	25.926
BOX768	BOX768_E	8	228	19	4	1.754	21.053
BOX768	BOX768_E	9	230	15	3	1.304	20
BOX768	BOX768_E	10	232	11	3	1.293	27.273
BOX768	BOX768_E	11	233	8	3	1.288	37.5
BOX768	BOX768_E	12	239	6	2	0.837	33.333
BOX768	BOX768_E	13	243	5	2	0.823	40
BOX768	BOX768_E	14	237	4	2	0.844	50
BOX768	BOX768_E	15	232	4	2	0.862	50
BOX768	BOX768_E	16	227	4	2	0.881	50
BOX768	BOX768_E	17	226	3	2	0.885	66.667
BOX768	BOX768_E	18	222	3	1	0.45	33.333
BOX768	BOX768_E	19	225	3	1	0.444	33.333
BOX768	BOX768_E	20	226	2	0	0	0
BOX768	BOX768_E	21	221	2	0	0	0
BOX768	BOX768_E	22	218	2	0	0	0
BOX768	BOX768_E	23	213	1	0	0	0
BOX768	BOX768_E	24	211	1	0	0	0
BOX768	BOX768_E	25	207	1	0	0	0
BOX768	BOX768_E	30	185	0	0	0	NaN
BOX768	BOX768_E	35	170	0	0	0	NaN
BOX768	BOX768_E	40	155	0	0	0	NaN
BOX768	BOX768_E	45	136	0	0	0	NaN
BOX768	BOX768_E	50	121	0	0	0	NaN
BOX768	BOX768_F	1	575	873	175	30.435	20.046
BOX768	BOX768_F	2	586	921	174	29.693	18.893
BOX768	BOX768_F	3	540	696	124	22.963	17.816
BOX768	BOX768_F	4	463	497	95	20.518	19.115
BOX768	BOX768_F	5	454	349	78	17.181	22.35
BOX768	BOX768_F	6	433	244	44	10.162	18.033
BOX768	BOX768_F	7	435	189	30	6.897	15.873
BOX768	BOX768_F	8	429	152	23	5.361	15.132
BOX768	BOX768_F	9	438	128	19	4.338	14.844
BOX768	BOX768_F	10	455	114	21	4.615	18.421
BOX768	BOX768_F	11	456	102	20	4.386	19.608
BOX768	BOX768_F	12	462	92	21	4.545	22.826
BOX768	BOX768_F	13	472	88	19	4.025	21.591
BOX768	BOX768_F	14	466	86	20	4.292	23.256
BOX768	BOX768_F	15	471	80	20	4.246	25
BOX768	BOX768_F	16	469	76	17	3.625	22.368
BOX768	BOX768_F	17	467	78	15	3.212	19.231
BOX768	BOX768_F	18	465	73	13	2.796	17.808
BOX768	BOX768_F	19	462	68	12	2.597	17.647
BOX768	BOX768_F	20	455	64	13	2.857	20.312
BOX768	BOX768_F	21	448	64	14	3.125	21.875
BOX768	BOX768_F	22	444	64	12	2.703	18.75
BOX768	BOX768_F	23	442	64	11	2.489	17.188
BOX768	BOX768_F	24	431	64	11	2.552	17.188
BOX768	BOX768_F	25	433	61	10	2.309	16.393
BOX768	BOX768_F	30	413	49	10	2.421	20.408
BOX768	BOX768_F	35	397	46	9	2.267	19.565
BOX768	BOX768_F	40	371	38	6	1.617	15.789
BOX768	BOX768_F	45	358	34	4	1.117	11.765
BOX768	BOX768_F	50	333	33	3	0.901	9.091
BOX769	BOX769_A	1	261	539	112	42.912	20.779
BOX769	BOX769_A	2	274	366	82	29.927	22.404
BOX769	BOX769_A	3	290	142	42	14.483	29.577
BOX769	BOX769_A	4	308	52	20	6.494	38.462
BOX769	BOX769_A	5	329	21	8	2.432	38.095
BOX769	BOX769_A	6	338	14	5	1.479	35.714
BOX769	BOX769_A	7	338	6	3	0.888	50
BOX769	BOX769_A	8	334	5	4	1.198	80
BOX769	BOX769_A	9	320	4	3	0.938	75
BOX769	BOX769_A	10	318	3	2	0.629	66.667
BOX769	BOX769_A	11	319	4	3	0.94	75
BOX769	BOX769_A	12	329	5	2	0.608	40
BOX769	BOX769_A	13	327	5	2	0.612	40
BOX769	BOX769_A	14	330	5	2	0.606	40
BOX769	BOX769_A	15	325	4	2	0.615	50
BOX769	BOX769_A	16	319	3	2	0.627	66.667
BOX769	BOX769_A	17	309	3	1	0.324	33.333
BOX769	BOX769_A	18	295	3	1	0.339	33.333
BOX769	BOX769_A	19	291	5	2	0.687	40
BOX769	BOX769_A	20	283	6	3	1.06	50
BOX769	BOX769_A	21	269	6	3	1.115	50
BOX769	BOX769_A	22	263	5	3	1.141	60
BOX769	BOX769_A	23	256	5	3	1.172	60
BOX769	BOX769_A	24	245	4	3	1.224	75
BOX769	BOX769_A	25	238	6	4	1.681	66.667
BOX769	BOX769_A	30	202	6	3	1.485	50
BOX769	BOX769_A	35	169	4	2	1.183	50
BOX769	BOX769_A	40	145	3	1	0.69	33.333
BOX769	BOX769_A	45	121	2	0	0	0
BOX769	BOX769_A	50	92	1	0	0	0
BOX769	BOX769_B	1	31	107	13	41.935	12.15
BOX769	BOX769_B	2	43	115	19	44.186	16.522
BOX769	BOX769_B	3	58	37	7	12.069	18.919
BOX769	BOX769_B	4	63	13	1	1.587	7.692
BOX769	BOX769_B	5	66	3	1	1.515	33.333
BOX769	BOX769_B	6	70	2	1	1.429	50
BOX769	BOX769_B	7	75	2	1	1.333	50
BOX769	BOX769_B	8	73	2	2	2.74	100
BOX769	BOX769_B	9	78	2	2	2.564	100
BOX769	BOX769_B	10	80	2	2	2.5	100
BOX769	BOX769_B	11	75	1	1	1.333	100
BOX769	BOX769_B	12	74	1	1	1.351	100
BOX769	BOX769_B	13	68	1	1	1.471	100
BOX769	BOX769_B	14	67	1	1	1.493	100
BOX769	BOX769_B	15	64	1	1	1.562	100
BOX769	BOX769_B	16	61	1	0	0	0
BOX769	BOX769_B	17	56	1	0	0	0
BOX769	BOX769_B	18	52	1	0	0	0
BOX769	BOX769_B	19	50	1	0	0	0
BOX769	BOX769_B	20	48	1	0	0	0
BOX769	BOX769_B	21	44	1	0	0	0
BOX769	BOX769_B	22	43	1	0	0	0
BOX769	BOX769_B	23	42	1	0	0	0
BOX769	BOX769_B	24	40	1	0	0	0
BOX769	BOX769_B	25	37	1	0	0	0
BOX769	BOX769_B	30	30	0	0	0	NaN
BOX769	BOX769_B	35	23	0	0	0	NaN
BOX769	BOX769_B	40	18	0	0	0	NaN
BOX769	BOX769_B	45	11	0	0	0	NaN
BOX769	BOX769_B	50	10	0	0	0	NaN
BOX769	BOX769_C	1	228	379	79	34.649	20.844
BOX769	BOX769_C	2	311	522	126	40.514	24.138
BOX769	BOX769_C	3	356	418	101	28.371	24.163
BOX769	BOX769_C	4	365	312	84	23.014	26.923
BOX769	BOX769_C	5	346	214	54	15.607	25.234
BOX769	BOX769_C	6	337	133	35	10.386	26.316
BOX769	BOX769_C	7	312	80	23	7.372	28.75
BOX769	BOX769_C	8	290	52	14	4.828	26.923
BOX769	BOX769_C	9	286	37	12	4.196	32.432
BOX769	BOX769_C	10	269	29	10	3.717	34.483
BOX769	BOX769_C	11	261	20	6	2.299	30
BOX769	BOX769_C	12	251	13	5	1.992	38.462
BOX769	BOX769_C	13	237	7	4	1.688	57.143
BOX769	BOX769_C	14	234	5	3	1.282	60
BOX769	BOX769_C	15	226	5	3	1.327	60
BOX769	BOX769_C	16	213	4	2	0.939	50
BOX769	BOX769_C	17	200	4	2	1	50
BOX769	BOX769_C	18	191	3	2	1.047	66.667
BOX769	BOX769_C	19	183	2	1	0.546	50
BOX769	BOX769_C	20	179	2	1	0.559	50
BOX769	BOX769_C	21	171	2	1	0.585	50
BOX769	BOX769_C	22	169	2	2	1.183	100
BOX769	BOX769_C	23	163	2	2	1.227	100
BOX769	BOX769_C	24	158	2	2	1.266	100
BOX769	BOX769_C	25	148	2	2	1.351	100
BOX769	BOX769_C	30	123	1	1	0.813	100
BOX769	BOX769_C	35	105	0	0	0	NaN
BOX769	BOX769_C	40	81	0	0	0	NaN
BOX769	BOX769_C	45	66	0	0	0	NaN
BOX769	BOX769_C	50	55	0	0	0	NaN
BOX769	BOX769_D	1	130	268	47	36.154	17.537
BOX769	BOX769_D	2	155	332	57	36.774	17.169
BOX769	BOX769_D	3	157	233	39	24.841	16.738
BOX769	BOX769_D	4	170	136	23	13.529	16.912
BOX769	BOX769_D	5	178	77	12	6.742	15.584
BOX769	BOX769_D	6	177	48	8	4.52	16.667
BOX769	BOX769_D	7	182	33	8	4.396	24.242
BOX769	BOX769_D	8	180	22	8	4.444	36.364
BOX769	BOX769_D	9	177	17	7	3.955	41.176
BOX769	BOX769_D	10	178	16	5	2.809	31.25
BOX769	BOX769_D	11	171	12	4	2.339	33.333
BOX769	BOX769_D	12	165	10	5	3.03	50
BOX769	BOX769_D	13	165	7	4	2.424	57.143
BOX769	BOX769_D	14	167	7	5	2.994	71.429
BOX769	BOX769_D	15	162	7	5	3.086	71.429
BOX769	BOX769_D	16	157	4	4	2.548	100
BOX769	BOX769_D	17	150	4	4	2.667	100
BOX769	BOX769_D	18	142	4	4	2.817	100
BOX769	BOX769_D	19	131	3	3	2.29	100
BOX769	BOX769_D	20	130	3	3	2.308	100
BOX769	BOX769_D	21	131	3	3	2.29	100
BOX769	BOX769_D	22	130	3	3	2.308	100
BOX769	BOX769_D	23	122	3	3	2.459	100
BOX769	BOX769_D	24	120	3	3	2.5	100
BOX769	BOX769_D	25	114	3	3	2.632	100
BOX769	BOX769_D	30	92	1	1	1.087	100
BOX769	BOX769_D	35	71	1	0	0	0
BOX769	BOX769_D	40	57	2	0	0	0
BOX769	BOX769_D	45	47	1	0	0	0
BOX769	BOX769_D	50	42	0	0	0	NaN

## Sheet: Figure S2F
genotype	animal_num	threshold	ch1_spots	ch2_spots	coloc_spots	ch1_percent	ch2_percent
BOX789	BOX789_A	1	236	132	23	9.746	17.424
BOX789	BOX789_A	2	323	198	63	19.505	31.818
BOX789	BOX789_A	3	313	246	62	19.808	25.203
BOX789	BOX789_A	4	291	292	69	23.711	23.63
BOX789	BOX789_A	5	251	305	67	26.693	21.967
BOX789	BOX789_A	6	235	292	58	24.681	19.863
BOX789	BOX789_A	7	217	262	41	18.894	15.649
BOX789	BOX789_A	8	197	238	33	16.751	13.866
BOX789	BOX789_A	9	174	230	31	17.816	13.478
BOX789	BOX789_A	10	162	204	22	13.58	10.784
BOX789	BOX789_A	11	151	187	17	11.258	9.091
BOX789	BOX789_A	12	136	165	12	8.824	7.273
BOX789	BOX789_A	13	131	152	12	9.16	7.895
BOX789	BOX789_A	14	126	148	14	11.111	9.459
BOX789	BOX789_A	15	120	150	17	14.167	11.333
BOX789	BOX789_A	16	119	154	16	13.445	10.39
BOX789	BOX789_A	17	114	152	17	14.912	11.184
BOX789	BOX789_A	18	111	140	15	13.514	10.714
BOX789	BOX789_A	19	108	137	14	12.963	10.219
BOX789	BOX789_A	20	105	131	11	10.476	8.397
BOX789	BOX789_A	21	101	127	11	10.891	8.661
BOX789	BOX789_A	22	104	123	14	13.462	11.382
BOX789	BOX789_A	23	101	117	11	10.891	9.402
BOX789	BOX789_A	24	99	110	12	12.121	10.909
BOX789	BOX789_A	25	97	107	12	12.371	11.215
BOX789	BOX789_A	30	86	83	10	11.628	12.048
BOX789	BOX789_A	35	84	72	9	10.714	12.5
BOX789	BOX789_A	40	78	52	6	7.692	11.538
BOX789	BOX789_A	45	74	38	4	5.405	10.526
BOX789	BOX789_A	50	64	29	4	6.25	13.793
BOX789	BOX789_B	1	1304	722	159	12.193	22.022
BOX789	BOX789_B	2	1571	1078	306	19.478	28.386
BOX789	BOX789_B	3	1735	1263	391	22.536	30.958
BOX789	BOX789_B	4	1736	1374	413	23.79	30.058
BOX789	BOX789_B	5	1684	1334	395	23.456	29.61
BOX789	BOX789_B	6	1583	1214	319	20.152	26.277
BOX789	BOX789_B	7	1481	1091	270	18.231	24.748
BOX789	BOX789_B	8	1391	997	223	16.032	22.367
BOX789	BOX789_B	9	1337	929	207	15.482	22.282
BOX789	BOX789_B	10	1271	899	202	15.893	22.469
BOX789	BOX789_B	11	1238	884	192	15.509	21.719
BOX789	BOX789_B	12	1210	873	203	16.777	23.253
BOX789	BOX789_B	13	1187	889	210	17.692	23.622
BOX789	BOX789_B	14	1152	894	203	17.622	22.707
BOX789	BOX789_B	15	1151	900	203	17.637	22.556
BOX789	BOX789_B	16	1138	909	210	18.453	23.102
BOX789	BOX789_B	17	1125	936	213	18.933	22.756
BOX789	BOX789_B	18	1119	958	225	20.107	23.486
BOX789	BOX789_B	19	1114	950	222	19.928	23.368
BOX789	BOX789_B	20	1107	953	217	19.603	22.77
BOX789	BOX789_B	21	1097	944	213	19.417	22.564
BOX789	BOX789_B	22	1100	940	222	20.182	23.617
BOX789	BOX789_B	23	1097	927	222	20.237	23.948
BOX789	BOX789_B	24	1085	905	208	19.171	22.983
BOX789	BOX789_B	25	1082	893	206	19.039	23.068
BOX789	BOX789_B	30	1061	787	171	16.117	21.728
BOX789	BOX789_B	35	1010	623	126	12.475	20.225
BOX789	BOX789_B	40	968	511	92	9.504	18.004
BOX789	BOX789_B	45	925	399	69	7.459	17.293
BOX789	BOX789_B	50	866	293	45	5.196	15.358
